# Supplementary material
Source: Royal Society of Chemistry journal article supplement (doi:10.1039/d6dt00524a)
Supplement: d6dt00524a1.pdf [file d6dt00524a1.pdf]

*Supporting Information for:*

**Synthesis, Structure & Diphenylacetylene Reduction Reactivity of a Carbide-Supported Fe<sub>4</sub>Mo<sub>2</sub> Carbonyl Cluster: A Higher Fe-Valence Hydride Intermediate for Enhanced Selectivity**

Emily Dick<sup>‡</sup>, Chris Joseph<sup>‡</sup>, Vincent M. Lynch and Michael J. Rose\*

*The University of Texas at Austin; Austin, TX 78757*

| <b>Contents</b>                                                                                                                                                                                                                                                                          | <b>Page</b>    |
|------------------------------------------------------------------------------------------------------------------------------------------------------------------------------------------------------------------------------------------------------------------------------------------|----------------|
| <b>Synthetic and experimental details</b>                                                                                                                                                                                                                                                | <b>S2-3</b>    |
| <b>Figures S1-2.</b> IR and <sup>13</sup> C NMR spectra for [K(benzo-18-crown-6)] <sub>2</sub> [Fe <sub>4</sub> Mo <sub>2</sub> (μ <sub>6</sub> -C)(μ <sub>2</sub> -CO) <sub>2</sub> (CO) <sub>16</sub> ]                                                                                | <b>S4-5</b>    |
| <b>X-ray Experimental details and analysis</b>                                                                                                                                                                                                                                           | <b>S6-8</b>    |
| <b>Figures S3-4.</b> ORTEP diagrams of X-ray crystal structures for [Fe <sub>4</sub> (μ <sub>4</sub> -C)(CO) <sub>12</sub> ] <sup>2-</sup> and [K(benzo-18-c-6)] <sub>2</sub> [Fe <sub>4</sub> Mo <sub>2</sub> (μ <sub>6</sub> -C)(μ <sub>2</sub> -CO) <sub>2</sub> (CO) <sub>16</sub> ] | <b>S9</b>      |
| <b>Figures S5-6.</b> IR spectra of putative Fe <sub>4</sub> Mo <sub>2</sub> <sup>4+</sup> and H <sub>2</sub> Fe <sub>4</sub> Mo <sub>2</sub> <sup>2-</sup> clusters                                                                                                                      | <b>S10-11</b>  |
| <b>Figure S7.</b> <sup>1</sup> H NMR spectrum for putative H <sub>2</sub> Fe <sub>4</sub> Mo <sub>2</sub> <sup>2-</sup>                                                                                                                                                                  | <b>S12</b>     |
| <b>Figures S8-9.</b> <sup>13</sup> C NMR spectrum for putative Fe <sub>4</sub> Mo <sub>2</sub> <sup>4+</sup> and its reaction with DPA                                                                                                                                                   | <b>S12-13</b>  |
| <b>Figures S10-12.</b> Cyclic voltammetry for Fe <sub>4</sub> Mo <sub>2</sub>                                                                                                                                                                                                            | <b>S14-15</b>  |
| <b>Figures S13-15.</b> Cyclic voltammetry for Fe <sub>5</sub> Mo                                                                                                                                                                                                                         | <b>S15-16</b>  |
| <b>Figures S16-18.</b> Cyclic voltammetry for Fe <sub>6</sub>                                                                                                                                                                                                                            | <b>S17-18</b>  |
| <b>Figure S19.</b> Comparison of cyclic voltammetry between clusters at 100 mV/s scan rate                                                                                                                                                                                               | <b>S19</b>     |
| <b>Figure S20.</b> Comparison of cyclic voltammetry between clusters at 10 mV/s scan rate                                                                                                                                                                                                | <b>S20</b>     |
| <b>Figures S21.</b> Cyclic voltammetry control for electrolyte solution                                                                                                                                                                                                                  | <b>S20</b>     |
| <b>Figures S22-28.</b> X-ray photoelectron spectra for each cluster                                                                                                                                                                                                                      | <b>S21-24</b>  |
| <b>Table S1.</b> Crystal data and structural refinement parameters for <b>1</b>                                                                                                                                                                                                          | <b>S25</b>     |
| <b>Tables S2-6.</b> Atomic coordinates, bond lengths, angles, anisotropic displacement parameters and torsion angles for <b>1</b>                                                                                                                                                        | <b>S26-72</b>  |
| <b>Table S7.</b> Crystal data and structural refinement parameters for <b>2</b>                                                                                                                                                                                                          | <b>S73</b>     |
| <b>Tables S8-12.</b> Atomic coordinates, bond lengths, angles, anisotropic displacement parameters and torsion angles for <b>2</b>                                                                                                                                                       | <b>S74-100</b> |

## Synthetic & Experimental Details

### Reagents and Procedures

All manipulations were performed under an inert atmosphere using Schlenk line or glovebox techniques. HPLC grade solvents were purchased from EMD, Fisher, Macron, or J.T. Baker, and dried through an alumina column system (Pure Process Technology). Deuterated solvent (*d*<sup>3</sup>-acetonitrile) was purchased from Acros Organics and used as received. Diphenylacetylene, FeCl<sub>3</sub>, NEt<sub>4</sub>Br, TfOH and benzo-18-crown-6 were used as received. [Fe<sub>6</sub>(μ<sub>6</sub>-C)(μ<sub>2</sub>-CO)<sub>4</sub>(CO)<sub>12</sub>]<sup>2-</sup>,<sup>1</sup> [Fe<sub>4</sub>(μ<sub>4</sub>-C(COOMe))(CO)<sub>12</sub>]<sup>-</sup>, [Fe<sub>4</sub>(μ<sub>4</sub>-C)(CO)<sub>13</sub>], [Fe<sub>4</sub>(μ<sub>4</sub>-C)(CO)<sub>12</sub>]<sup>2-</sup> (**1**), KC<sub>8</sub>,<sup>2</sup> and Mo(chpt)(CO)<sub>3</sub> were prepared according to literature procedures.

*Caution:* Iron carbonyls are extremely toxic and potassium graphite is pyrophoric. Such materials should be handled carefully in a drybox or well-ventilated fume hood under inert atmosphere.

[K(benzo-18-crown-6)]<sub>2</sub>[Fe<sub>4</sub>Mo<sub>2</sub>(μ<sub>6</sub>-C)(μ<sub>2</sub>-CO)<sub>2</sub>(CO)<sub>16</sub>] (**2**) In an N<sub>2</sub> glovebox atmosphere, solid Mo(chpt)(CO)<sub>3</sub> (111.3 mg, 0.4090 mmol) was added into a pressure tube and charged with [K(benzo-18-crown-6)]<sub>2</sub>[Fe<sub>4</sub>(μ<sub>4</sub>-C)(CO)<sub>12</sub>] (101.1 mg, 0.0793 mmol) in 1,2-dichloroethane (5 mL) and the solution was stirred for 8 h at 80 °C. The solution was passed through a Celite filter and dried under reduced pressure. The resulting dark-brown oil was washed with pentane and Et<sub>2</sub>O and subsequently recrystallized by vapor diffusion of pentane into a DCE solution of the product. X-ray quality crystals were grown by vapor diffusion of Et<sub>2</sub>O into a 1:1 DCE/FPh solution of the product at -20 °C. Yield: 83.0 mg (64%). Selected IR peaks (**Figure S1**), solid, ν(CO): 2040(w), 1928(s), 1869(s) cm<sup>-1</sup>. <sup>13</sup>C{<sup>1</sup>H} NMR (125.8 MHz, MeCN-d<sub>3</sub>), δ in ppm from TMS: 473.4 ppm (carbide), 147.4, 131.2, 126.8, 121.7, 121.4, 121.1, 118.5, 111.9 ppm (CO). Anal. calcd. for C<sub>51</sub>H<sub>48</sub>O<sub>30</sub>Fe<sub>4</sub>Mo<sub>2</sub>K<sub>2</sub>: C, 37.48; H, 2.96; found: C, 36.20; H, 3.48.

**Diphenylacetylene Reduction.** In an N<sub>2</sub> glovebox atmosphere, sodium (11.5 mg, 0.500 mmol) was stirred into a 5 mL THF solution of perylene (63.1 mg, 0.251 mmol) at -20 °C and allowed to stir for 4 h at room temperature. The resulting dark purple solution was added into a concentrated THF solution of the selected cluster (0.016 mmol), diphenylacetylene (15 equiv) and the proton source (30 equiv). The resulting mixture was stirred for 20 h, solvent evaporated, and the organic products were extracted into hexanes. Serial dilution followed by GCMS analysis was used to determine relative ratios of DPA to *cis*-DPE, *trans*-DPE and DP-Ethane. GCMS analysis utilized a Thermo Scientific Trace GC Ultra GC instrument equipped with an Agilent DB-WAXETR capillary column (30 m × 0.25 mm) with a 0.25 μm film thickness coupled with a Thermo Scientific TSQ Quantum GC MS instrument using EI ionization method. A 1.0 μL aliquot of the diluted sample was injected into the GC using a split/splitless injector with a splitless time of 1.00 min and a flow rate of 0.9 mL/min of helium at an initial temperature of 40 °C, which was maintained for 1.00 min and ramped by 20 °C/min to a final temperature of 260 °C, which was maintained for 10.00 min. Retention times of DP-Ethane, *cis*-DPE, DPA, and *trans*-DPE were 9.58, 9.72, 11.02 and 11.43 min (respectively).

## X-ray Photoelectron Spectroscopy

XPS samples of Fe<sub>6</sub>, Fe<sub>5</sub>Mo and Fe<sub>4</sub>Mo<sub>2</sub> (**2**) were prepared by dissolving 2 mg of the analyte into separate polyethylene glycol (PEG)/MeCN (10 mg/mL) solutions. Samples were then dropcast onto silicon wafers to form thin films for measurement. Spectra were recorded using a Kratos Axis Ultra XPS equipped with an Al-K $\alpha$  X-ray source monochromated to 1486.6 eV. The photoelectron takeoff angle was 0°, and the pressure in the acquisition chamber was on the order of 10<sup>-9</sup> Torr for all samples analyzed. Survey scans were obtained under the following conditions: pass energy of 160, 1.000 eV step size, and 300 ms dwell time. Region scans were obtained under the following conditions: pass energy of 20, 0.100 eV step size, and 1500 ms dwell time. All peaks in the spectra for Fe<sub>6</sub>, Fe<sub>5</sub>Mo and Fe<sub>4</sub>Mo<sub>2</sub> were referenced against the PEG C 1s peak (286.45 eV) for each dataset.

XPS studies were run without the charge neutralizer gun activated. Iterative survey scans of the Fe<sub>6</sub> sample were taken and showed that peak positions were stable without the charge neutralizer gun turned on. This agrees with previous reports on the conductivity of thin films of PEG and shows that there were no significant charging effects in these thin films.<sup>3</sup> During the course of these studies, it was observed that turning on the charge neutralizer, followed by turning the neutralizer off again, increased the signal in the Fe 2p XPS region of any future survey scans taken on these samples. We posit that some rearrangement of the Fe<sub>6</sub> loading in the PEG thin film occurs under the charge neutralizer, causing the surface concentration of Fe to increase. We note that such mobility of Fe<sub>6</sub> clusters is very surprising and warrants further study that is outside the scope of this manuscript.

In modelling the high resolution XPS region data for the transition metals, FeOx and MoOx species were tested for an improved fit. These oxidized metal species are likely the result of trace oxidizing gases in the glovebox atmosphere. When the fit was clearly improved, these species were left in the model as a second species. When calculating atom percents in the sample, the oxide species were ignored.

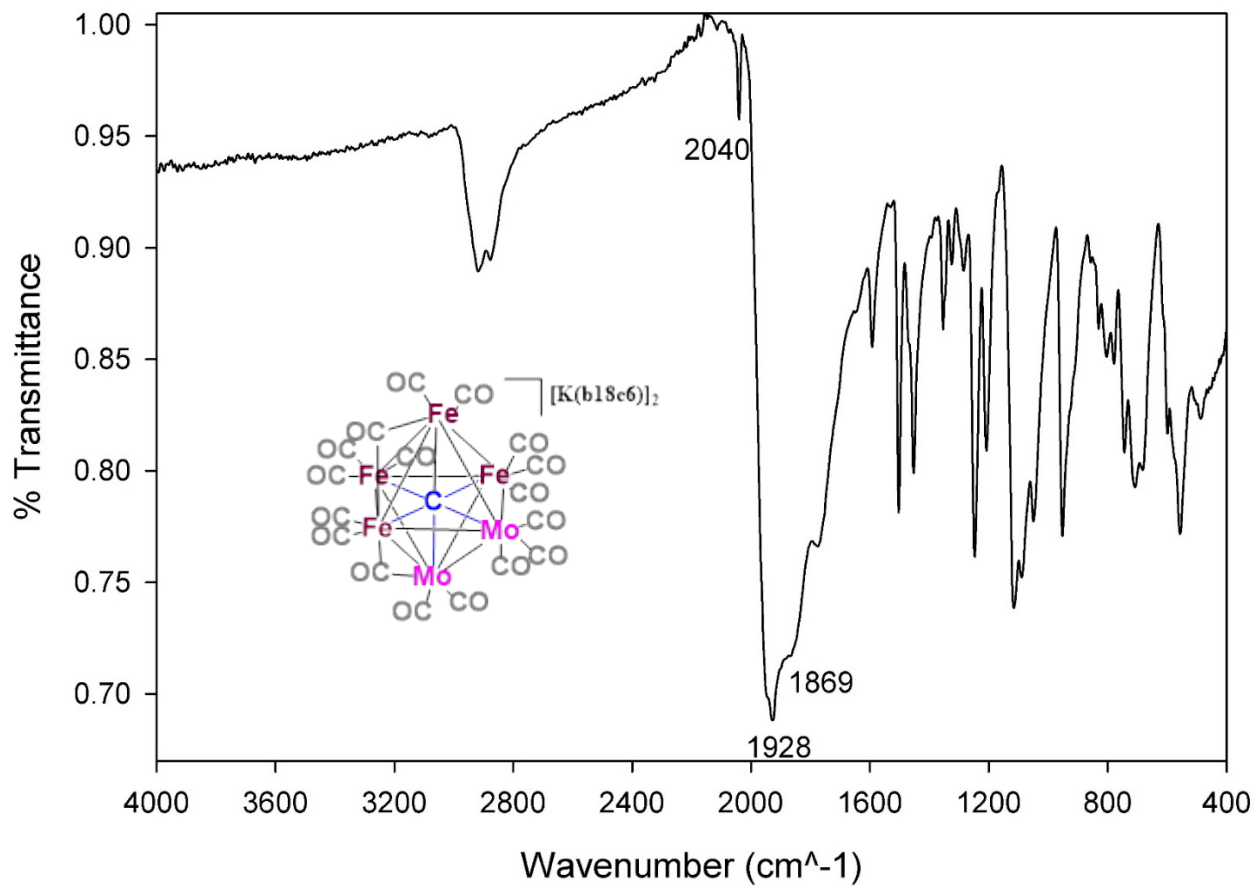

**Figure S1.** IR spectrum of  $[K(\text{benzo-18-crown-6})]_2[\text{Fe}_4\text{Mo}_2(\mu_6\text{-C})(\mu_2\text{-CO})_2(\text{CO})_{16}]$  (2) in the solid crystalline state.

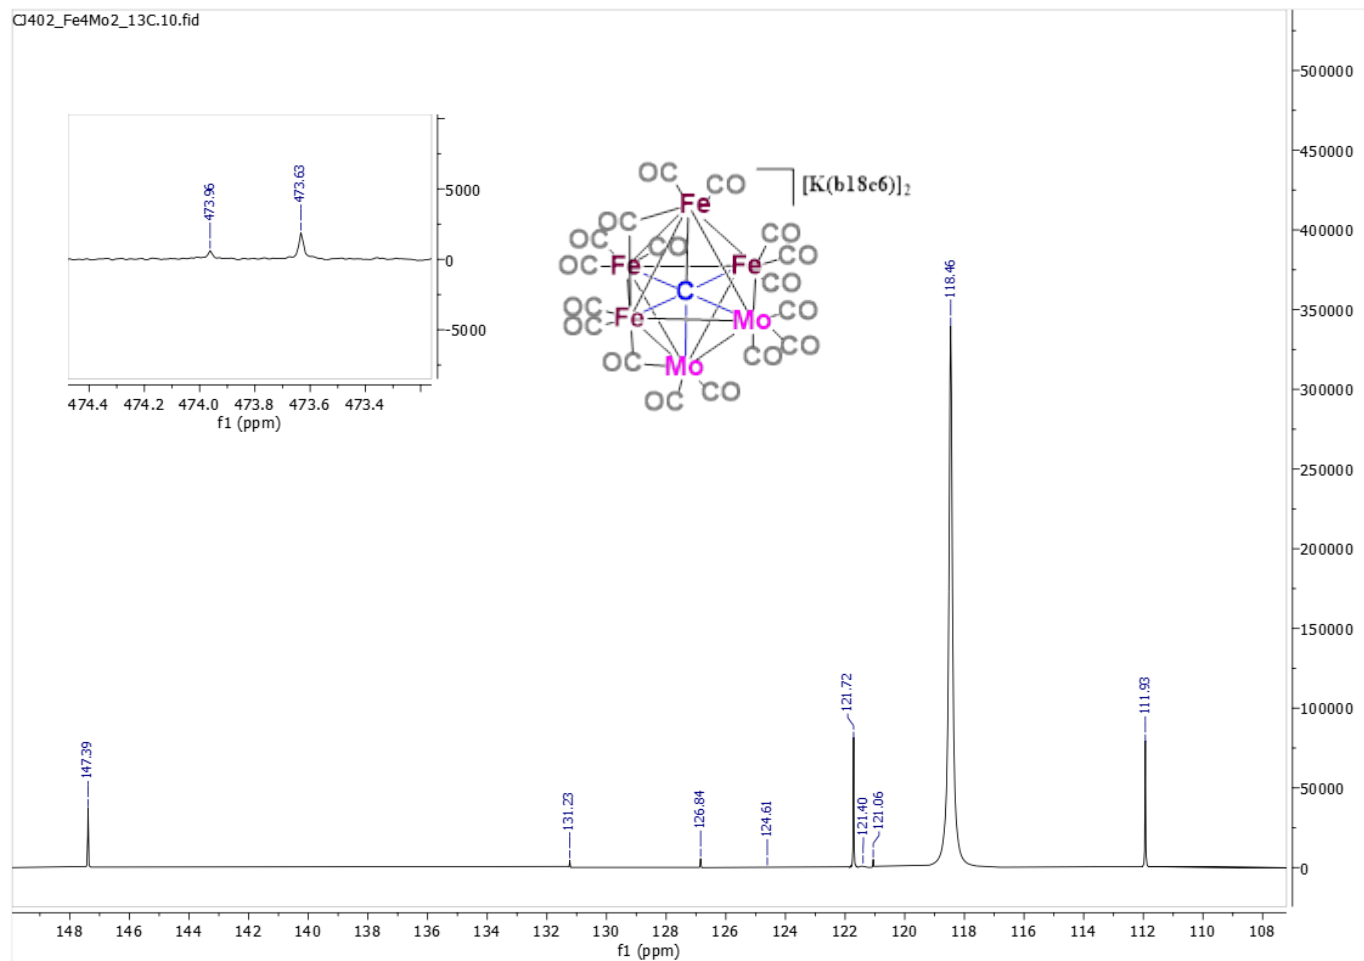

**Figure S2.**  $^{13}\text{C}$  NMR spectrum of **2**, in  $d_3$ -MeCN at 25 °C.

## X-ray Experimental

### Structure 1

Crystals grew as small, dark brown plates by slow evaporation from fluorobenzene. The data had approximate dimensions; 0.12×0.09×0.04 mm. The data were collected on a Rigaku Oxford Diffraction SuperNova Dual Source diffractometer using a  $\mu$ -focus Cu K $\alpha$  radiation source ( $\lambda = 1.5418\text{\AA}$ ) with collimating mirror monochromators. A total of 1215 frames of data were collected using  $\omega$ -scans with a scan range of  $1^\circ$  and a counting time of 12.5 seconds per frame with a detector offset of  $\pm 41.3^\circ$  and 37.5 seconds per frame with a detector offset of  $108.3^\circ$ . The data were collected at 100 K using an Oxford Cryostream low temperature device. Details of crystal data, data collection and structure refinement are listed in **Tables S1-S6**. Data collection, unit cell refinement and data reduction were performed using Rigaku Oxford Diffraction CrysAlisPro V 1.171.38.43f.<sup>2</sup> The structure was solved by direct methods using SHELXT<sup>3</sup> and refined by full-matrix least-squares on  $F^2$  with anisotropic displacement parameters for the non-H atoms using SHELXL-2018/3.<sup>4</sup> Structure analysis was aided by use of the programs PLATON<sup>5</sup> and OLEX2.<sup>6</sup> The hydrogen atoms were calculated in ideal positions with isotropic displacement parameters set to  $1.2 \times U_{\text{eq}}$  of the attached atom ( $1.5 \times U_{\text{eq}}$  for methyl hydrogen atoms).

The complex resides around a crystallographic inversion center at 0, 1,  $\frac{1}{2}$ . The complex consists of three iron-carbonyl clusters interspersed with six benzo-18-crown-6 potassium ion complexes. The central iron carbonyl cluster is disordered around a crystallographic inversion center. There are also five molecules of fluorobenzene per complex. All fluorobenzene molecules were disordered. The disorder was modeled in the same manner for each. The site occupancy factors for one component was set to  $1-x$ , while the alternate site occupancy factor was set to  $x$ . A common isotropic displacement parameter was refined for all atoms of the disordered group while refining the variable  $x$ . Upon convergence of  $x$ , the site occupancy factors were fixed and the displacement parameters were refined with restraints applied to make the displacement parameters similar for all atoms in the molecule and for the displacement parameters to remain approximately isotropic. Near the end of the refinement process, the geometry of the phenyl rings was idealized using the AFIX 66 constraint.

The function,  $\sum w(|F_o|^2 - |F_c|^2)^2$ , was minimized, where  $w = 1/[(\sigma(F_o))^2 + (0.023 \cdot P)^2]$  and  $P = (|F_o|^2 + 2|F_c|^2)/3$ .  $R_w(F^2)$  refined to 0.157, with  $R(F)$  equal to 0.0702 and a goodness of fit,  $S$ , = 0.937. Definitions used for calculating  $R(F)$ ,  $R_w(F^2)$  and the goodness of fit,  $S$ , are given below.<sup>7</sup> The data were checked for secondary extinction effects but no correction was necessary. Neutral atom scattering factors and values used to calculate the linear absorption coefficient are from the International Tables for X-ray Crystallography (1992).<sup>8</sup> All figures were generated using SHELXTL/PC.<sup>9</sup> Tables of positional and

thermal parameters, bond lengths and angles, torsion angles and figures are found below as **Tables S1-S6. Structure 2.**

Crystals grew as dark brown plates by vapor diffusion of diethyl ether into a fluorobenzene solution. The data crystal had approximate dimensions; 0.29×0.22×0.18 mm. The data were collected on a Rigaku AFC12 diffractometer with a Saturn 724+ CCD using a graphite monochromator with MoK $\alpha$  radiation ( $\lambda = 0.71073$  Å). A total of 1420 frames of data were collected using  $\omega$ -scans with a scan range of 0.5°. The data were collected at 100 K using a Rigaku XStream Cryostream low temperature device. Details of crystal data, data collection and structure refinement are listed in **Tables S7-S12**. Data reduction were performed using the Rigaku Americas Corporation's Crystal Clear version 1.40.<sup>10</sup> The structure was solved by direct methods using SHELXT<sup>2</sup> and refined by full-matrix least-squares on  $F^2$  with anisotropic displacement parameters for the non-H atoms using SHELXL-2018/8.<sup>4</sup> Structure analysis was aided by use of the programs PLATON<sup>5</sup> and OLEX2.<sup>6</sup> The hydrogen atoms on carbon were calculated in ideal positions with isotropic displacement parameters set to  $1.2 \times U_{eq}$  of the attached atom.

The structure resides around an approximate, non-crystallographic inversion center near 0.39, 0.75, 0.89. The structure consists of two (benzo-18-crown-6)K moieties and one Fe<sub>4</sub>Mo<sub>2</sub>(CO)<sub>18</sub>C complex. The Fe<sub>4</sub>Mo<sub>2</sub>(CO)<sub>18</sub>C complex is disordered about two orientations with site occupancies of 0.58 for one composed of Mo1, Mo2, Fe1, Fe2, Fe3 and Fe4 with carbonyl group labels appended by an A, while the second complex has a site occupancy of 0.42 with labels appended by a B. The site occupancy factors were refined by setting the site occupancy for one component to the variable  $x$ , while the site occupancy for the alternate component was set to  $(1-x)$ . The displacement parameters were refined with similarity restraints while refining the variable  $x$ . Upon convergence of the variable  $x$ , the displacement parameters were allowed to refine. The refinement was plagued by very high correlation coefficients of atoms related by the approximate inversion center. Generous use of displacement parameter restraints and bond length restraints were used throughout the refinement. In severe cases, where atoms could not be refined anisotropically, these atoms were refined isotropically.

An alternate model was initially proposed in the much more common space group,  $P21/n$ . In this space group, the metal complex was disordered around a crystallographic inversion center requiring the site occupancy factors for the two components to be equal to  $\frac{1}{2}$ . The class of reflections,  $0\ k\ 0$ , where  $k$  is odd have two very weak reflections with  $I > 2\ \sigma\ I$ ,  $0\ 1\ 0$  and  $0\ 9\ 0$ . However, it is not uncommon for some reflections to have intensity above noise level with a strongly scattering crystal. However, we think the correct space group is  $Pn$  because the agreement factors in  $Pn$  are dramatically lower than those using the model in  $P21/n$ . The model in  $P21/n$  has  $R_1 = 0.0707$ , with a  $wR_2 = 0.159$  compared with  $R_1 = 0.0249$  and  $wR_2 = 0.0619$ .

The function,  $\Sigma w(|F_o|^2 - |F_c|^2)^2$ , was minimized, where  $w = 1/[(\sigma(F_o))^2 + (0.0309*P)^2 + (1.7063*P)]$  and  $P = (|F_o|^2 + 2|F_c|^2)/3$ .  $R_w(F^2)$  refined to 0.0619, with  $R(F)$  equal to 0.0249 and a goodness of fit,  $S$ , = 1.03. Definitions used for calculating  $R(F)$ ,  $R_w(F^2)$  and the goodness of fit,  $S$ , are given below.<sup>7</sup> The data were checked for secondary extinction effects but no correction was necessary. Neutral atom scattering factors and values used to calculate the linear absorption coefficient are from the International Tables for X-ray Crystallography (1992).<sup>8</sup> All figures were generated using SHELXTL/PC.<sup>9</sup> Tables of positional and thermal parameters, bond lengths and angles, torsion angles and figures are found below as **Tables S7-S12**.

## Analysis of Crystallographic Structures

### Structure 1

Similar to previous reports on the structure of tetra-iron–carbide clusters, the crystal structure data for **1** (**Figure S3**) revealed a four-coordinate carbide encompassed by four Fe atoms fixed in a butterfly geometry. The asymmetric unit of the crystal structure (in  $P-1$ ) contains 1.5  $[\text{Fe}_4(\mu_4\text{-C})(\text{CO})_{12}]^{2-}$  units and three  $[\text{K}(\text{benzo-18-crown-6})]^+$ , where the carbide of the half-occupied  $\text{Fe}_4$  unit (s.o.f. = 0.5) is located near an inversion center. In comparison to the previously reported structure for the hexa-iron cluster  $(\text{NEt}_4)_2[\text{Fe}_6(\mu_6\text{-C})(\mu_2\text{-CO})_4(\text{CO})_{12}]$ , the average Fe–Fe and Fe–C<sub>carbide</sub> contacts are slightly compressed from 2.66(6) Å and 1.88(1) Å (respectively) in the six-iron cluster, to 2.62(4) Å, 1.87(11) Å in **1**. Additionally, several O<sub>CO</sub> atoms exhibit close contacts with the crowned K ion (avg  $2.83 \pm 0.18$  Å for O<sub>CO</sub>–K  $\leq 3$  Å) in the case of **1**.

### Structure 2

The structure of **2** in **Figure S4** (in  $P2n$ ) exhibits an inversion center near the carbide, despite the *cis* orientation of the molybdenum atoms. The crowned K cations exhibit close contact with carbonyl oxygen atoms (avg  $2.80 \pm 0.14$  Å for O<sub>CO</sub>–K  $\leq 3$  Å) similar to that observed in previous structures.

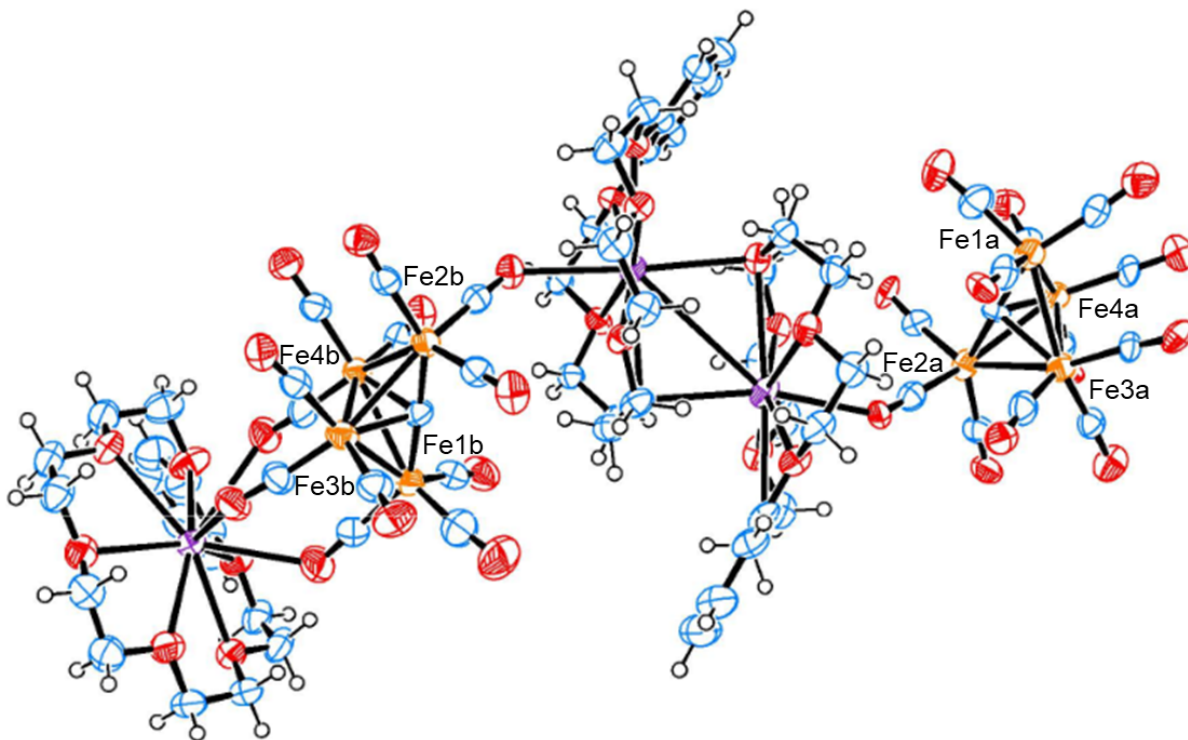

**Figure S3.** Full thermal ellipsoid plot (50% ellipsoids) of  $[\text{K}(\text{benzo-18-crown-6})]_2[\text{Fe}_4(\mu_4\text{-C})(\text{CO})_{12}]$  (**1**) ( $Z = 2$ ).

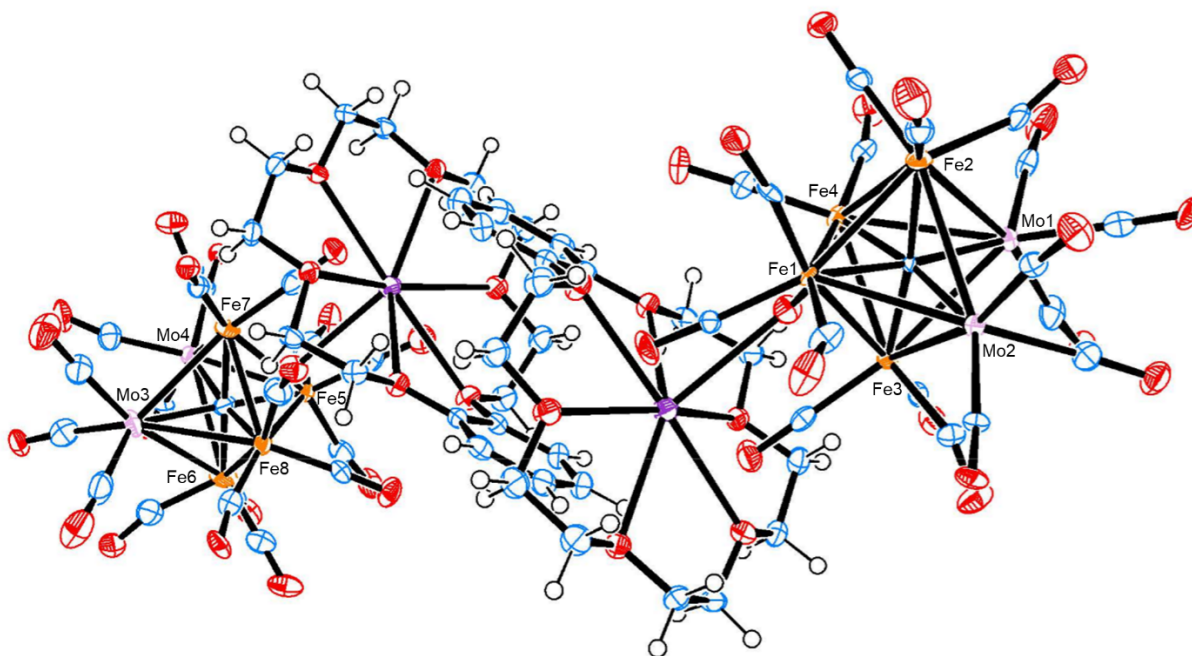

**Figure S4.** Thermal ellipsoid plot (50% ellipsoids) of  $[\text{K}(\text{benzo-18-crown-6})]_2[\text{Fe}_4\text{Mo}_2(\mu_6\text{-C})(\mu_2\text{-CO})_2(\text{CO})_{16}]$  (**2**) ( $Z = 2$ ).

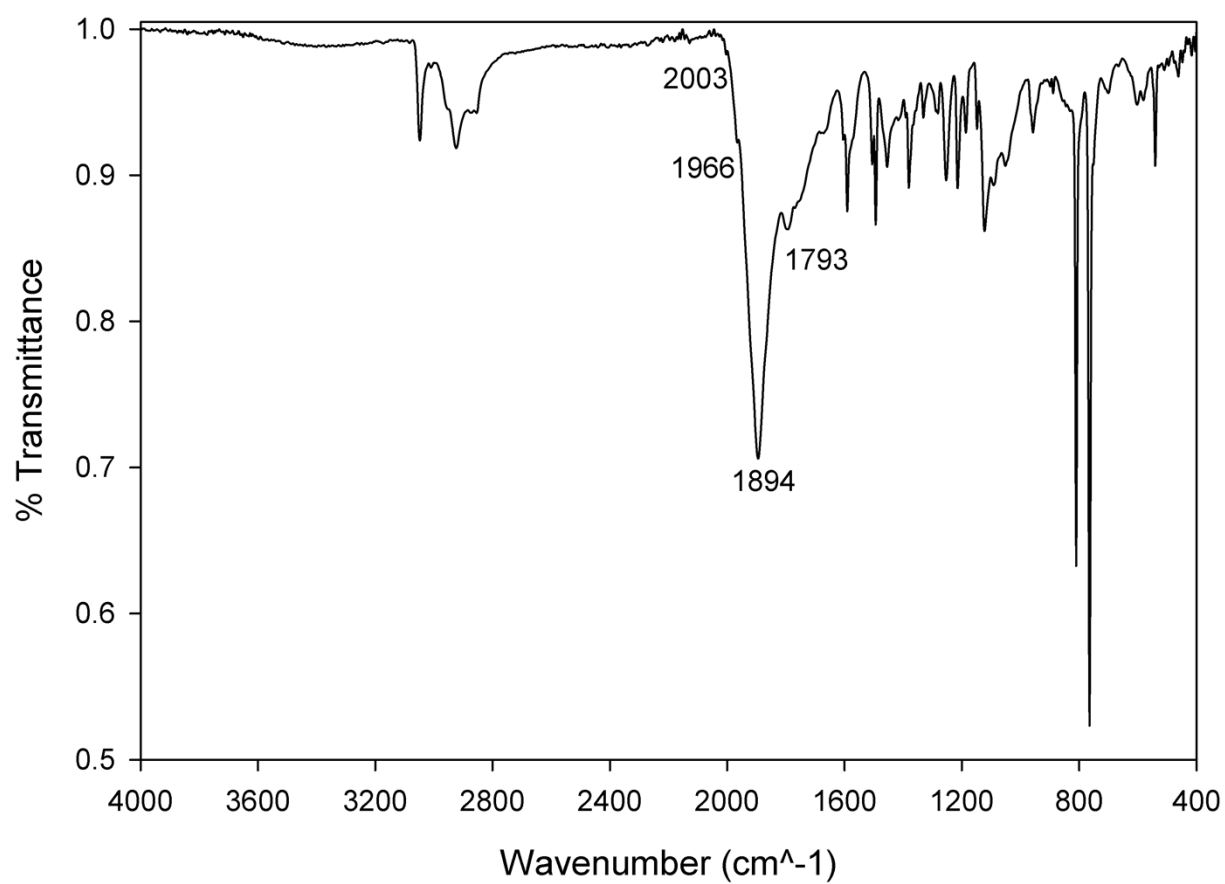

**Figure S5.** IR spectrum following two electron reduction of **2** with Na<sub>2</sub>per in THF to generate Fe<sub>4</sub>Mo<sub>2</sub><sup>4+</sup>.

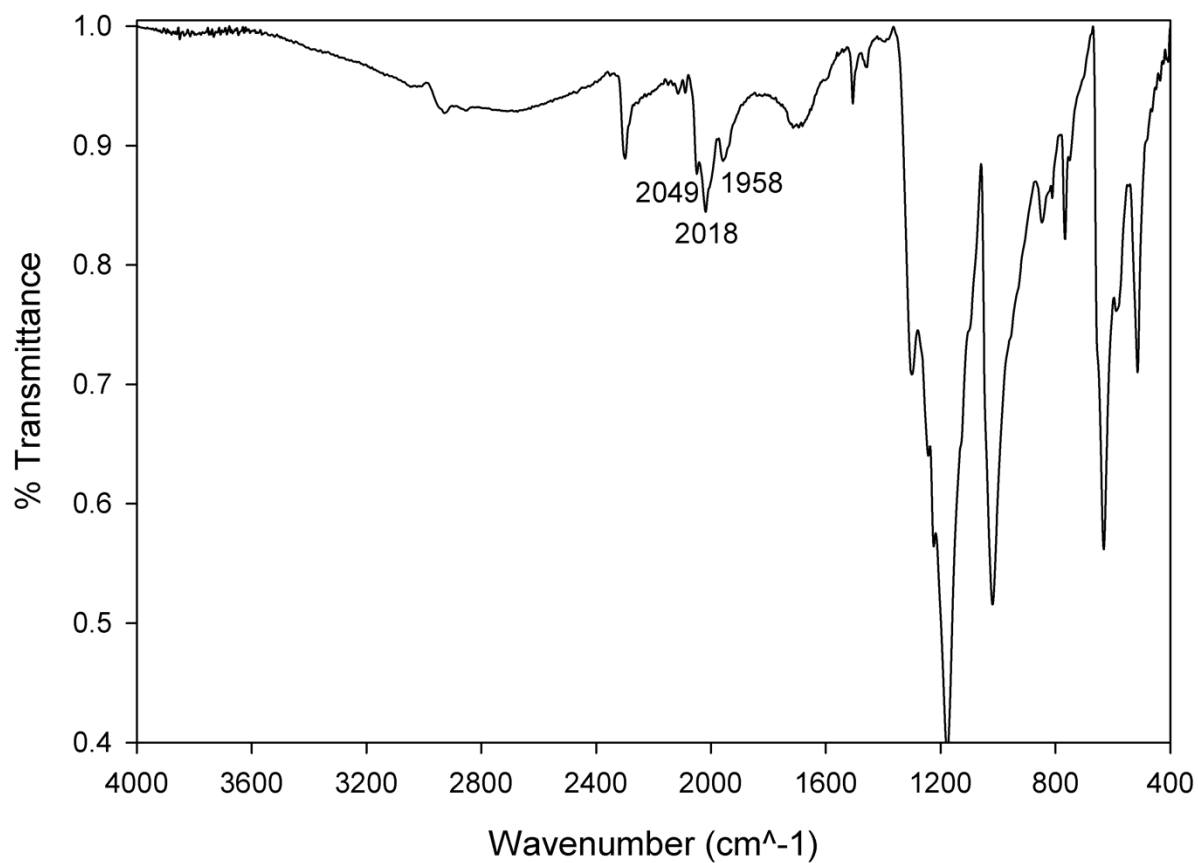

**Figure S6.** IR spectrum following protonation of  $\text{Fe}_4\text{Mo}_2^{4-}$  with TfOH in MeCN to generate  $\text{H}_2\text{Fe}_4\text{Mo}_2^{2-}$ .

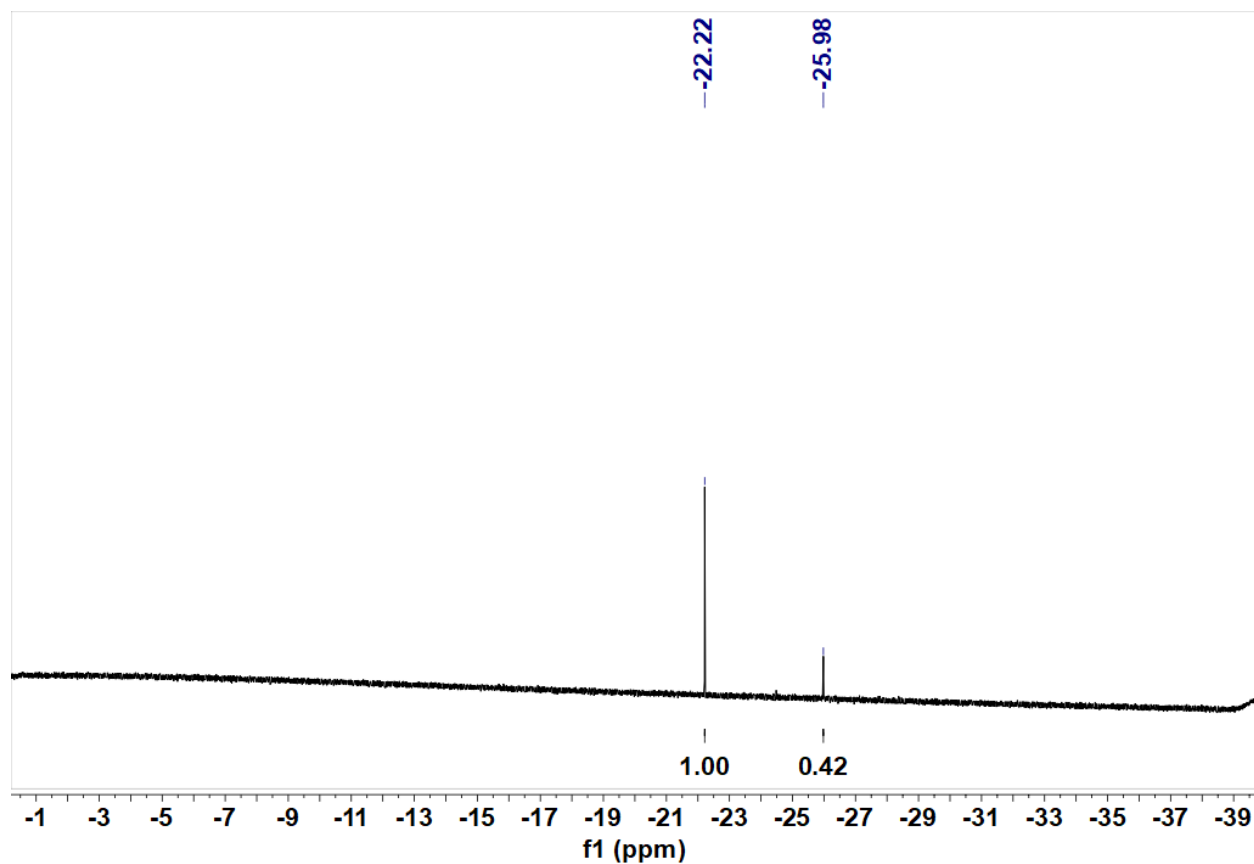

**Figure S7.**  $^1\text{H}$  NMR spectrum of the full hydride region after reduction of **2** with  $\text{Na}_2\text{per}$  (THF) and protonation with TfoH in  $d_3\text{-MeCN}$  at 25 °C.

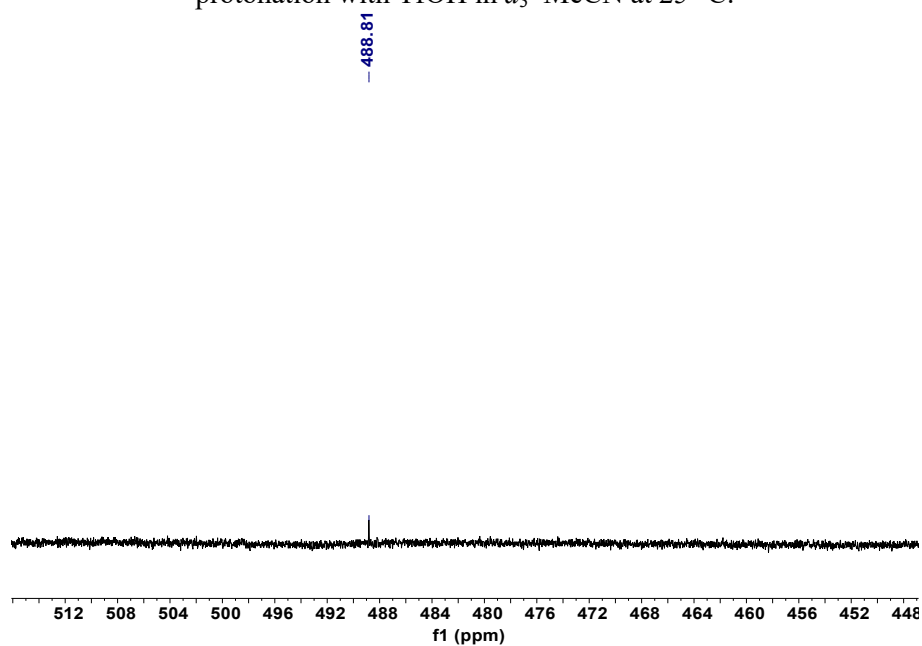

**Figure S8.**  $^{13}\text{C}$  NMR spectrum of the carbide region after reduction of **2** with  $\text{KC}_8$  in  $d_3\text{-MeCN}$  at 25 °C.

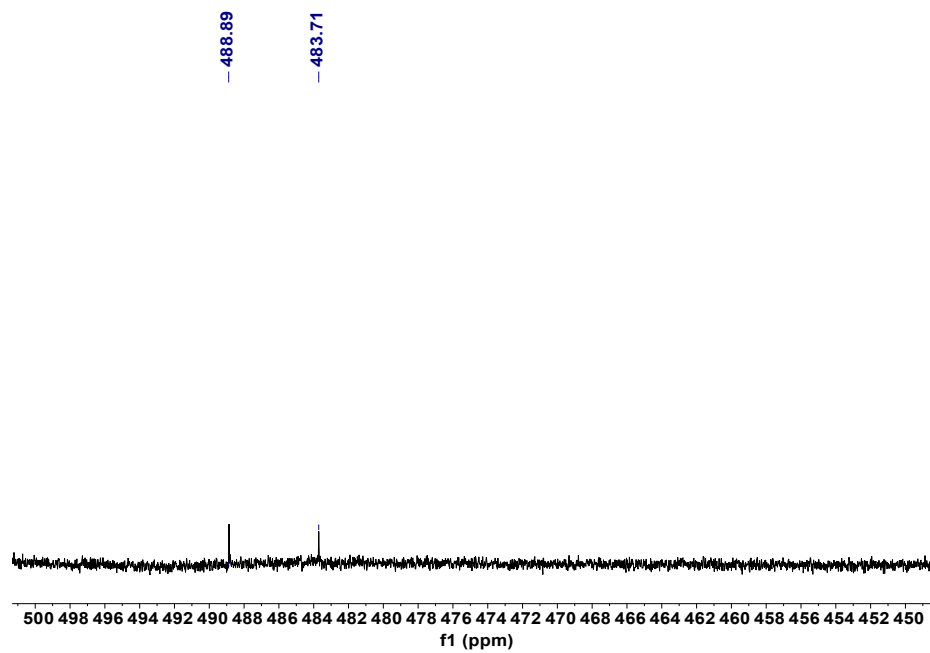

**Figure S9.**  $^{13}\text{C}$  NMR spectrum of the carbide region after reduction of **2** with  $\text{KC}_8$  and reaction with DPA in  $d_3$ -MeCN at 25 °C for 18 h.

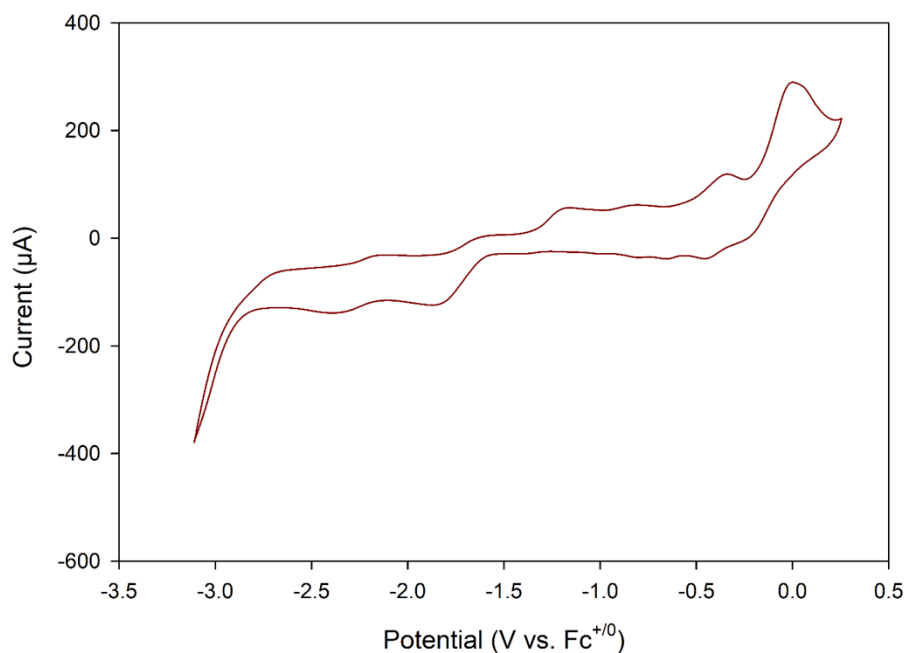

**Figure S10.** Cyclic voltammogram (vs Fc/Fc<sup>+</sup>) of 5 mM of Fe<sub>4</sub>Mo<sub>2</sub> in MeCN containing 0.2 M TBAPF<sub>6</sub>. Experiment conditions: WE, glassy carbon; CE, Pt wire; RE, Ag wire quasi-reference; scan rate: **100 mV/s**.

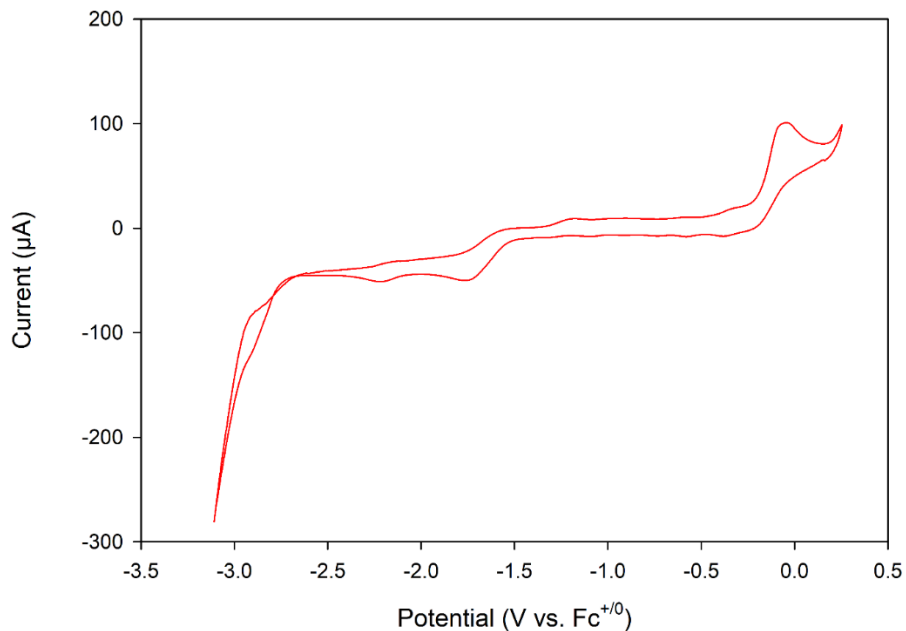

**Figure S11.** Cyclic voltammogram (vs Fc/Fc<sup>+</sup>) of 5 mM of Fe<sub>4</sub>Mo<sub>2</sub> in MeCN containing 0.2 M TBAPF<sub>6</sub>. Experiment conditions: WE, glassy carbon; CE, Pt wire; RE, Ag wire quasi-reference; scan rate: **10 mV/s**.

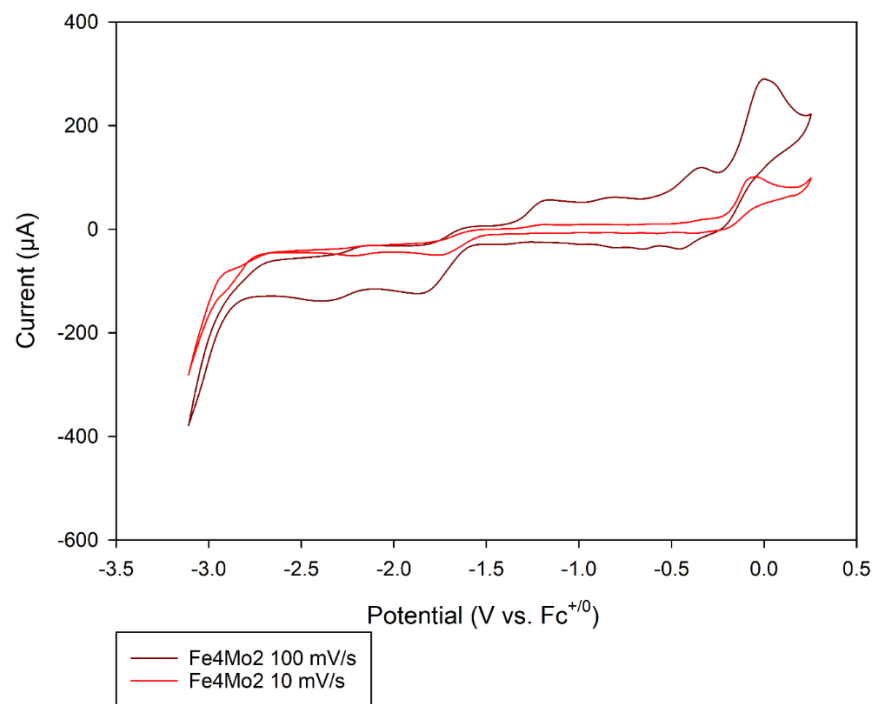

**Figure S12.** Comparison of scan rate effect on the cyclic voltammograms (vs Fc/Fc<sup>+</sup>) of 5 mM of Fe<sub>4</sub>Mo<sub>2</sub> in MeCN containing 0.2 M TBAPF<sub>6</sub>. WE, glassy carbon; CE, Pt wire; RE, Ag wire quasi-reference.

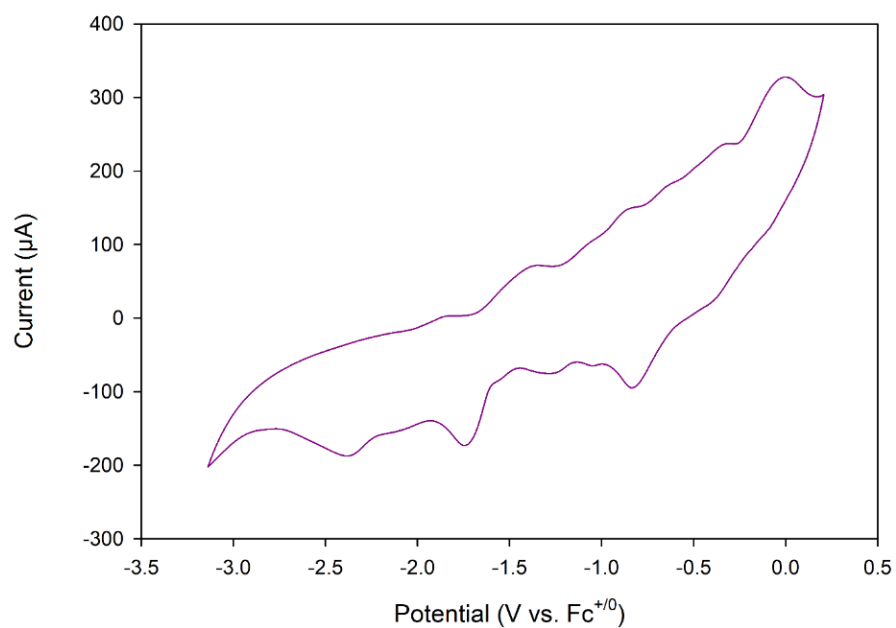

**Figure S13.** Cyclic voltammogram (vs Fc/Fc<sup>+</sup>) of 5 mM of Fe<sub>5</sub>Mo in MeCN containing 0.2 M TBAPF<sub>6</sub>. Experiment conditions: WE, glassy carbon; CE, Pt wire; RE, Ag wire quasi-reference; scan rate: **100 mV/s**.

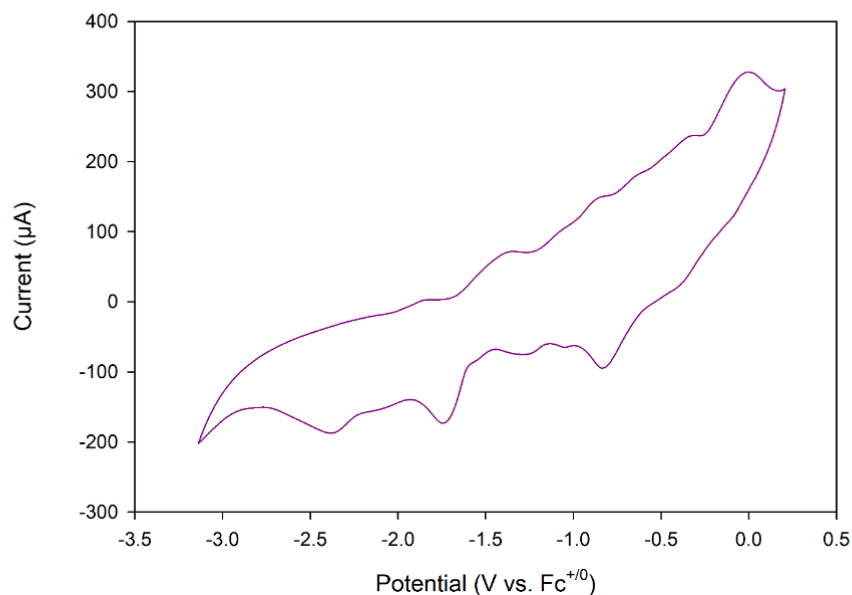

**Figure S14.** Cyclic voltammogram (vs Fc/Fc<sup>+</sup>) of 5 mM of Fe<sub>5</sub>Mo in MeCN containing 0.2 M TBAPF<sub>6</sub>. Experiment conditions: WE, glassy carbon; CE, Pt wire; RE, Ag wire quasi-reference; scan rate: **10 mV/s**.

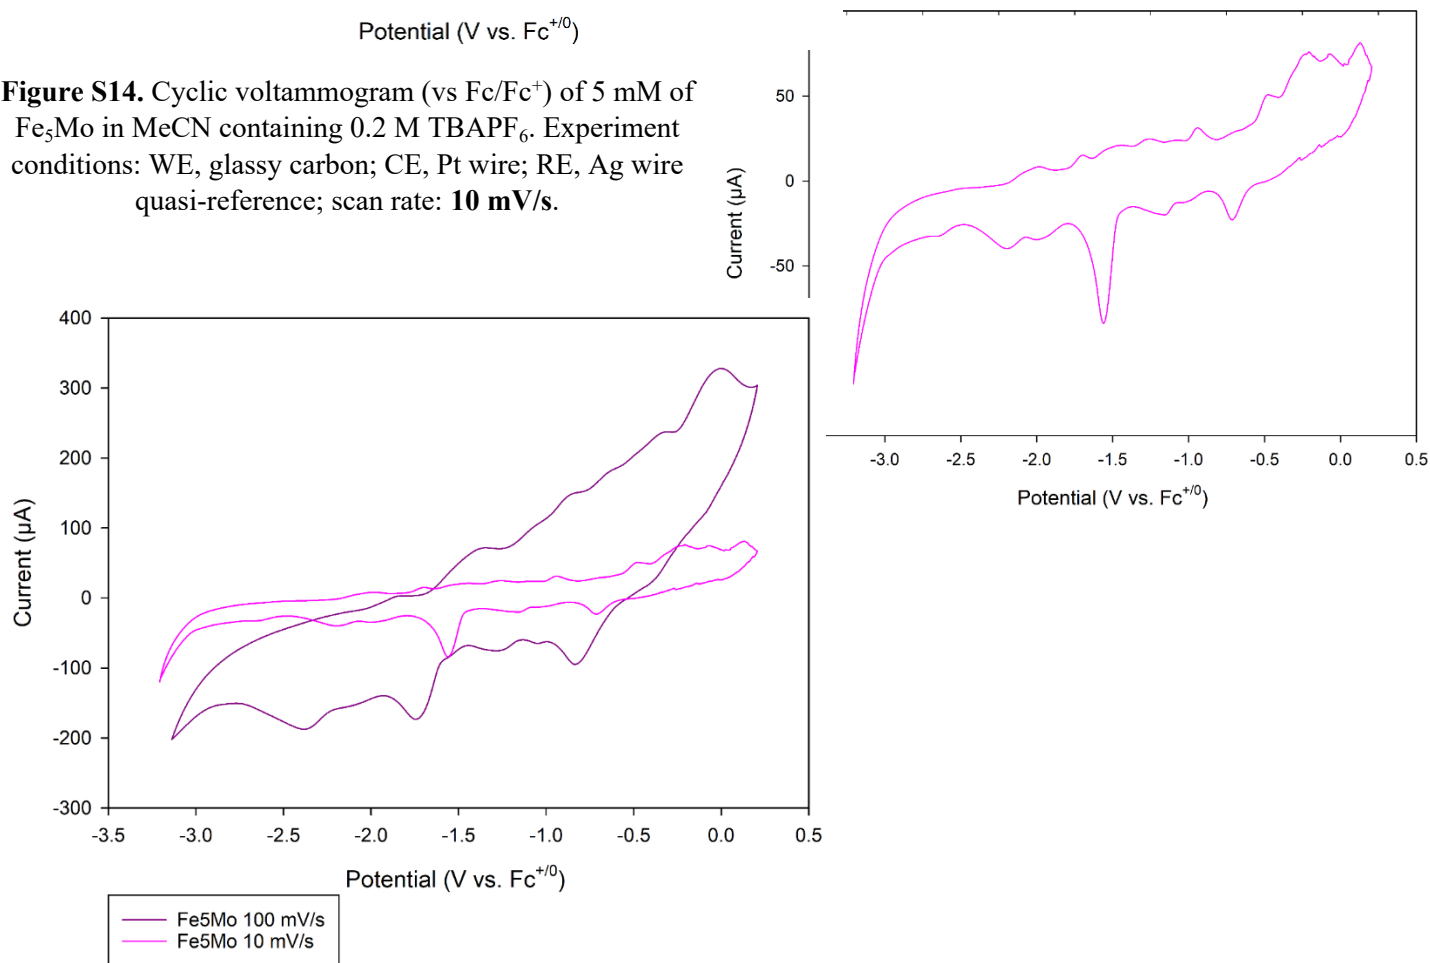

**Figure S15.** Comparison of the scan rate effect on the cyclic voltammograms (vs  $\text{Fc}/\text{Fc}^+$ ) of 5 mM of  $\text{Fe}_5\text{Mo}$  in MeCN containing 0.2 M TBAPF<sub>6</sub>. Experiment conditions: WE, glassy carbon; CE, Pt wire; RE, Ag wire quasi-reference.

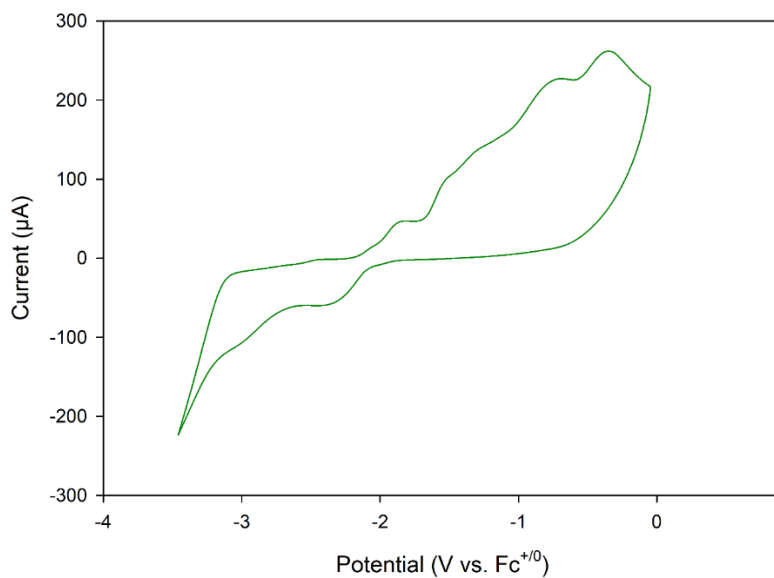

**Figure S16.** Cyclic voltammogram (vs  $\text{Fc}/\text{Fc}^+$ ) of 5 mM of  $\text{Fe}_6$  in MeCN containing 0.2 M TBAPF<sub>6</sub>. Experiment conditions: WE, glassy carbon; CE, Pt wire; RE, Ag wire quasi-reference; scan rate: **100 mV/s**.

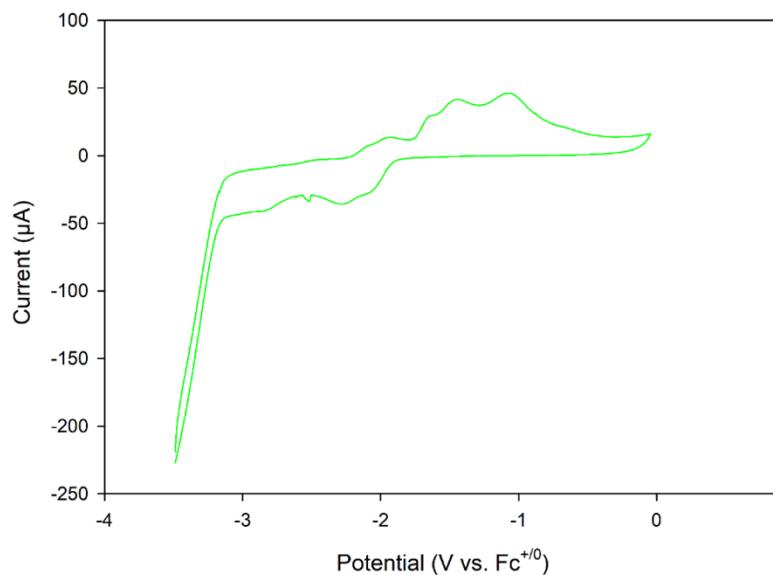

**Figure S17.** Cyclic voltammogram (vs  $\text{Fc}/\text{Fc}^+$ ) of 5 mM of  $\text{Fe}_6$  in MeCN containing 0.2 M TBAPF<sub>6</sub>. Experiment conditions: WE, glassy carbon; CE, Pt wire; RE, Ag wire quasi-reference; scan rate: **10 mV/s**.

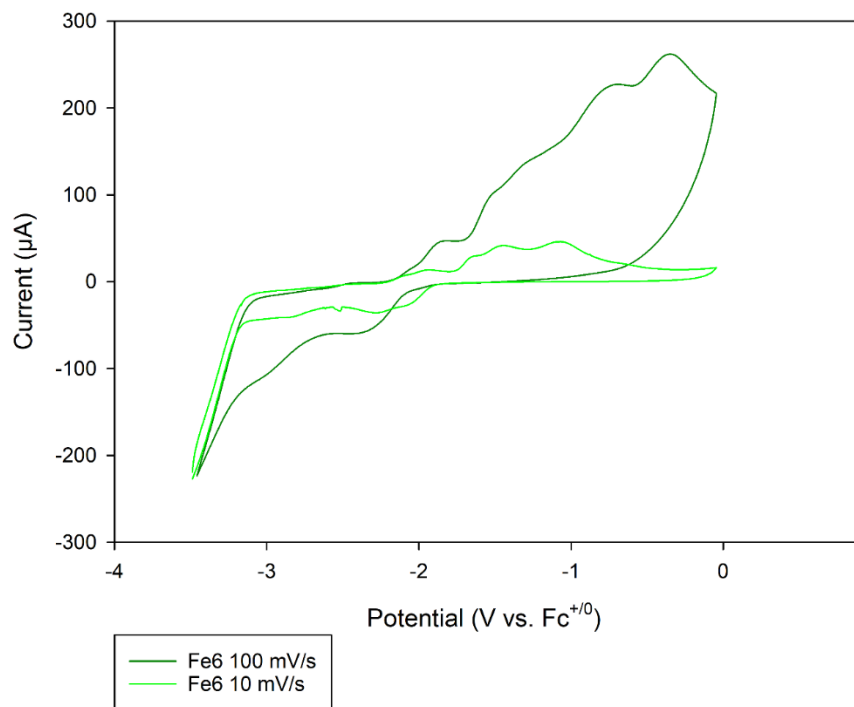

**Figure S18.** Comparison of scan rate effect on the cyclic voltammograms (vs Fc/Fc<sup>+</sup>) of 5 mM of Fe<sub>6</sub> in MeCN containing 0.2 M TBAPF<sub>6</sub>. Experiment conditions: WE, glassy carbon; CE, Pt wire; RE, Ag wire quasi-reference.

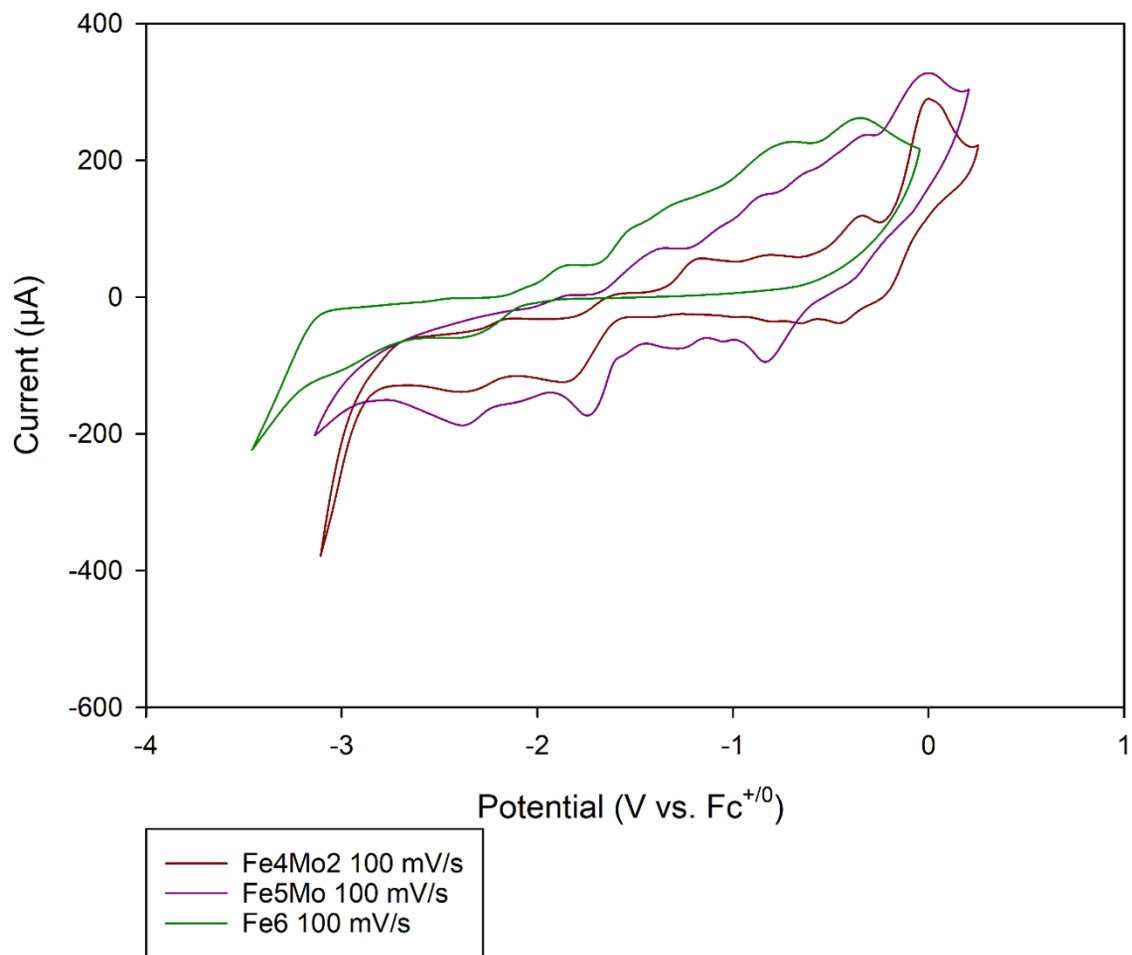

**Figure S19.** Comparison of the cyclic voltammograms (vs Fc/Fc<sup>+</sup>) of 5 mM of cluster in MeCN containing 0.2 M TBAPF<sub>6</sub>. Experiment conditions: WE, glassy carbon; CE, Pt wire; RE, Ag wire quasi-reference; scan rate: **100 mV/s**.

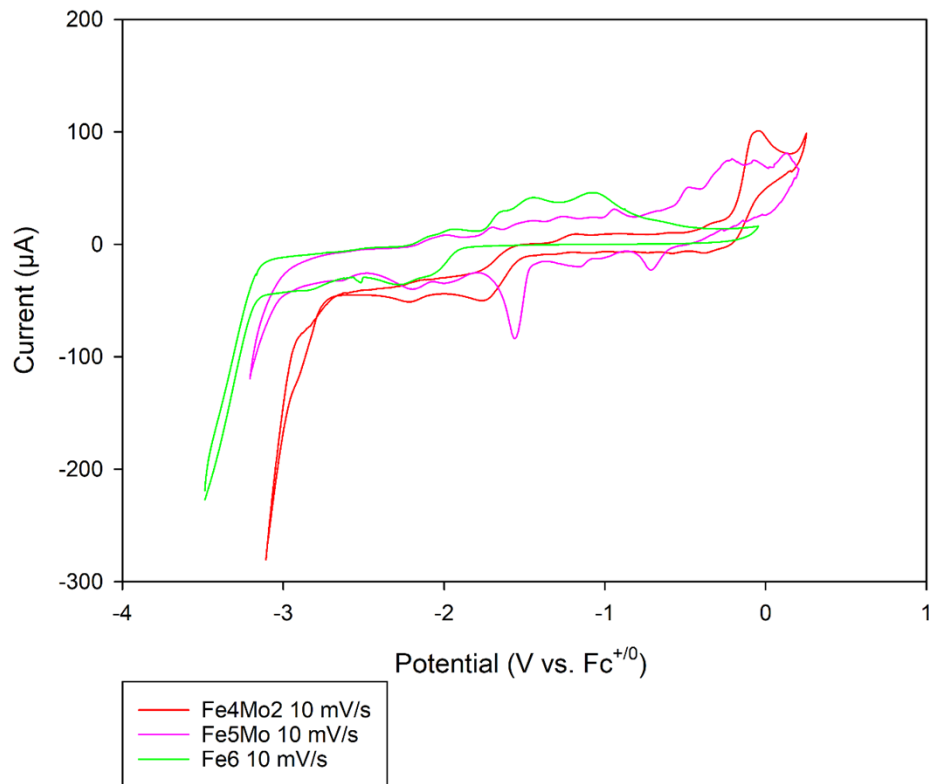

**Figure S20.** Comparison of cyclic voltammograms (vs Fc/Fc<sup>+</sup>) of 5 mM of cluster in MeCN containing 0.2 M TBAPF<sub>6</sub>. Experiment conditions: WE, glassy carbon; CE, Pt wire; RE, Ag wire quasi-reference; scan rate: **10 mV/s**.

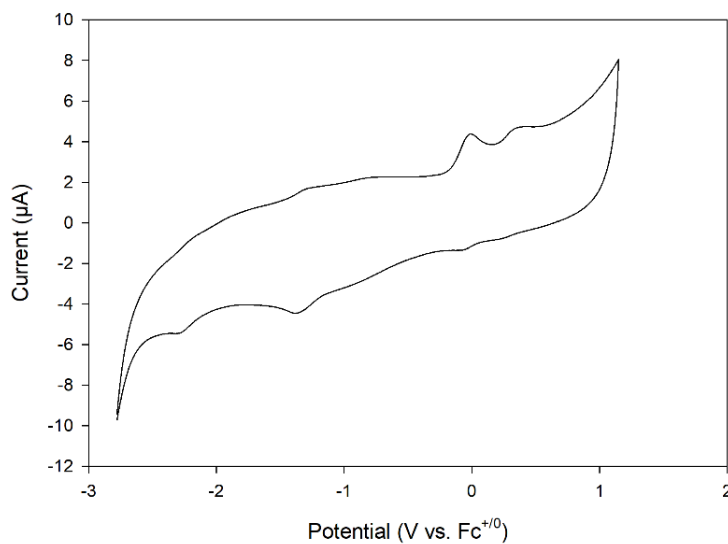

**Figure S21.** Cyclic voltammogram (vs Fc/Fc<sup>+</sup>) of MeCN containing 0.2 M TBAPF<sub>6</sub>. Experiment conditions: WE, glassy carbon; CE, Pt wire; RE, Ag wire quasi-reference; scan rate: **100 mV/s**.

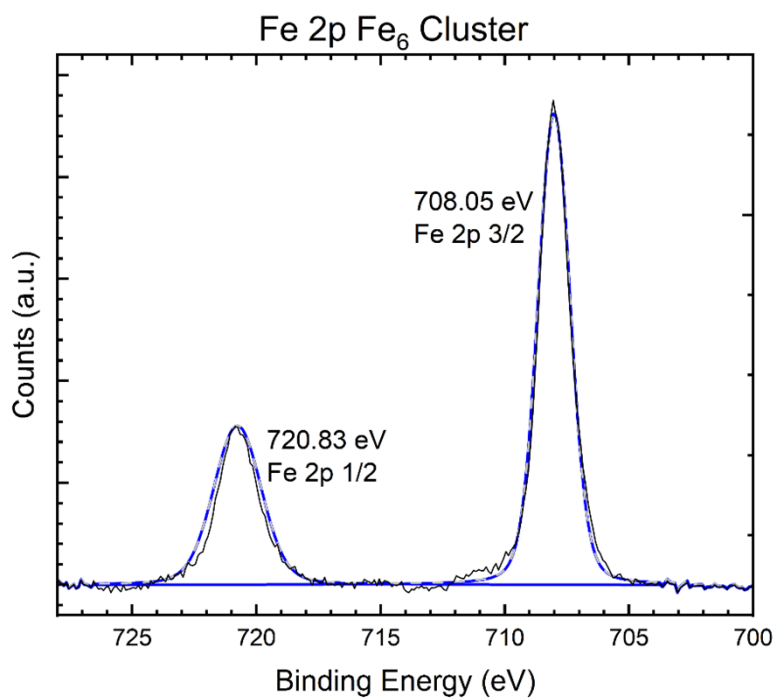

**Figure S22.** High-resolution X-ray photo-electron spectrum (XPS) of the iron 2*p* region of Fe<sub>6</sub>.

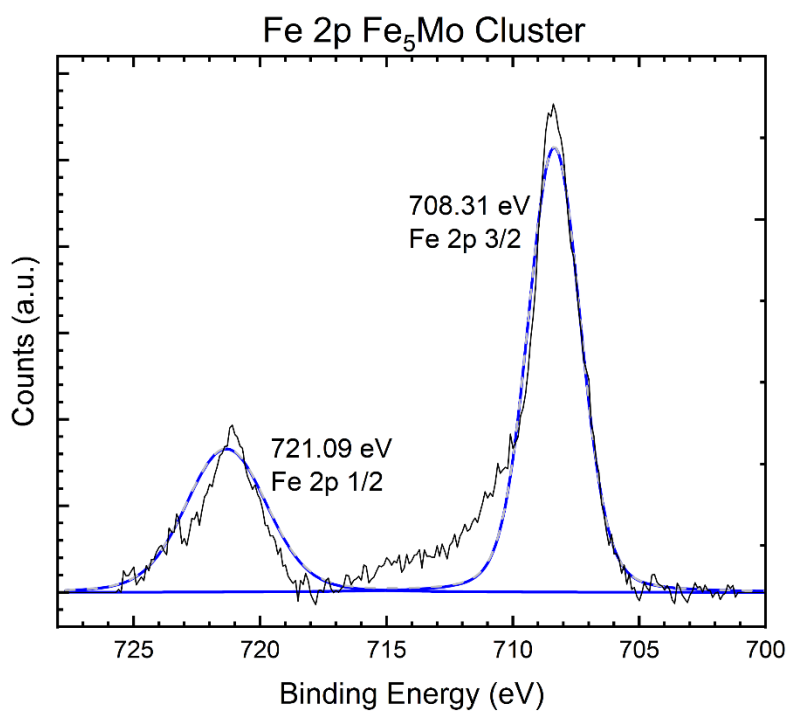

**Figure S23.** High-resolution X-ray photo-electron spectrum (XPS) of the iron 2*p* region of Fe<sub>5</sub>Mo.

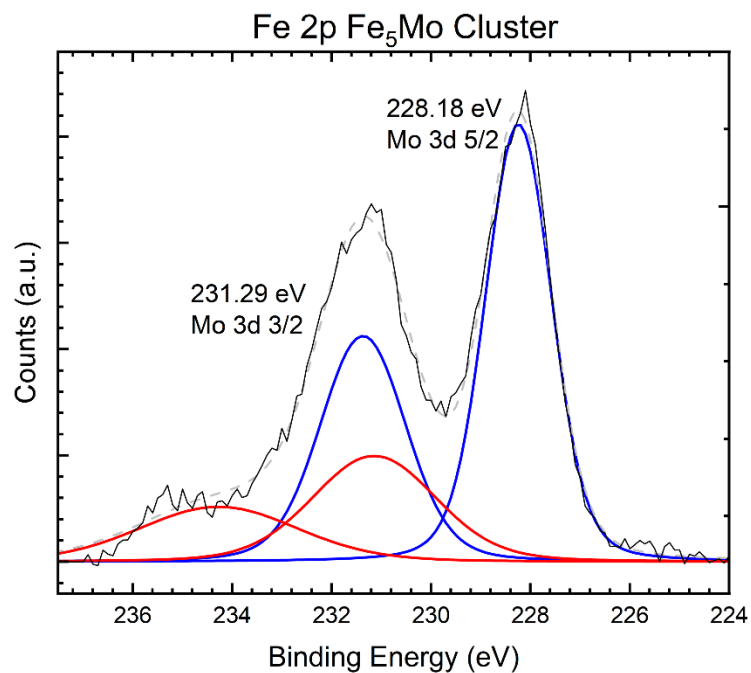

**Figure S24.** High-resolution X-ray photo-electron spectrum (XPS) of the molybdenum 3d region of Fe<sub>5</sub>Mo.

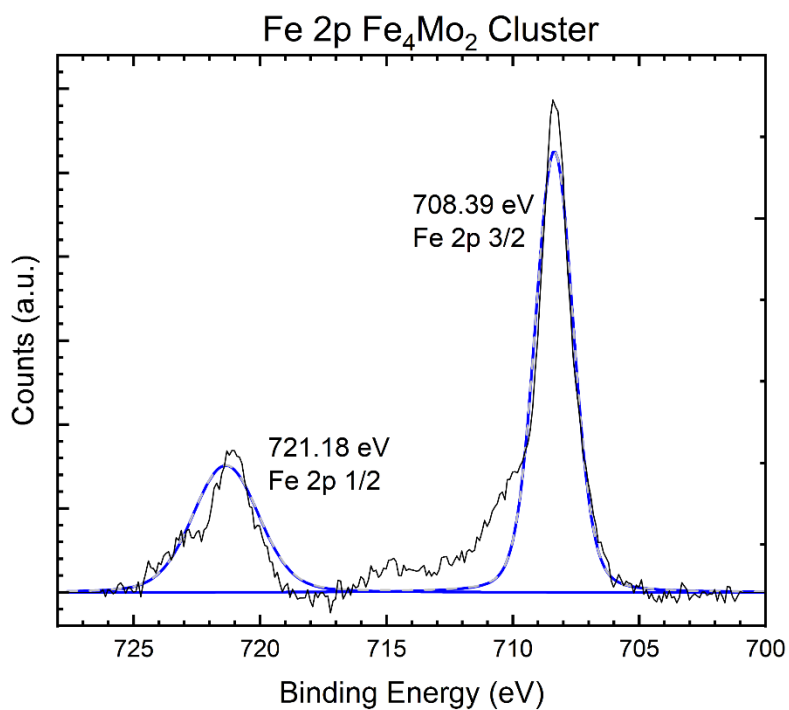

**Figure S25.** High-resolution X-ray photo-electron spectrum (XPS) of the iron 2p region of Fe<sub>4</sub>Mo<sub>2</sub>.

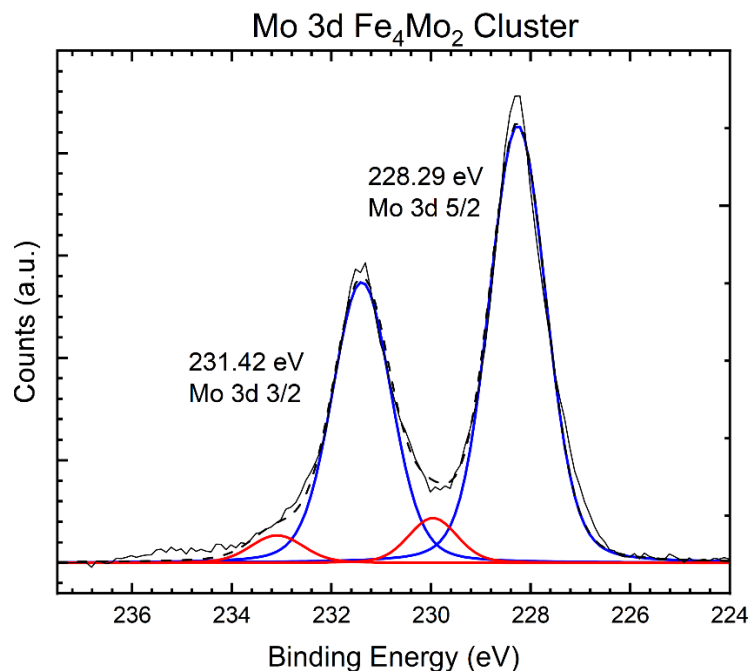

**Figure S26.** High-resolution X-ray photo-electron spectrum (XPS) of the molybdenum 3*d* region of Fe<sub>4</sub>Mo<sub>2</sub>.

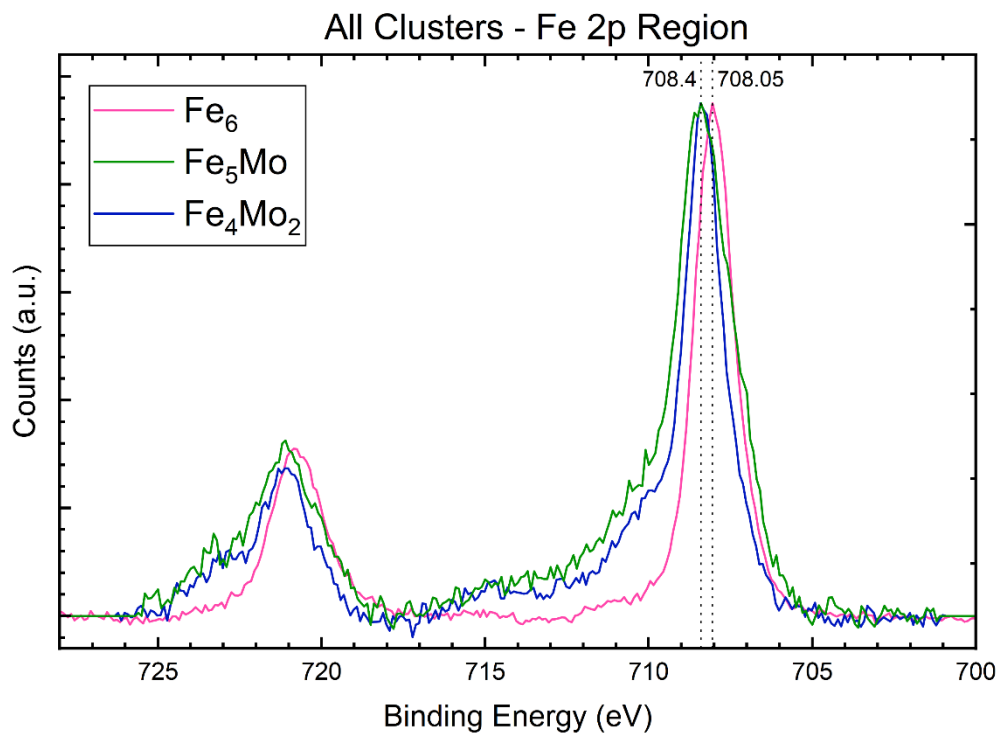

**Figure S27.** High-resolution X-ray photo-electron spectrum (XPS) of the iron 2*p* regions of Fe<sub>6</sub> (pink), Fe<sub>5</sub>Mo (green) and Fe<sub>4</sub>Mo<sub>2</sub> (blue).

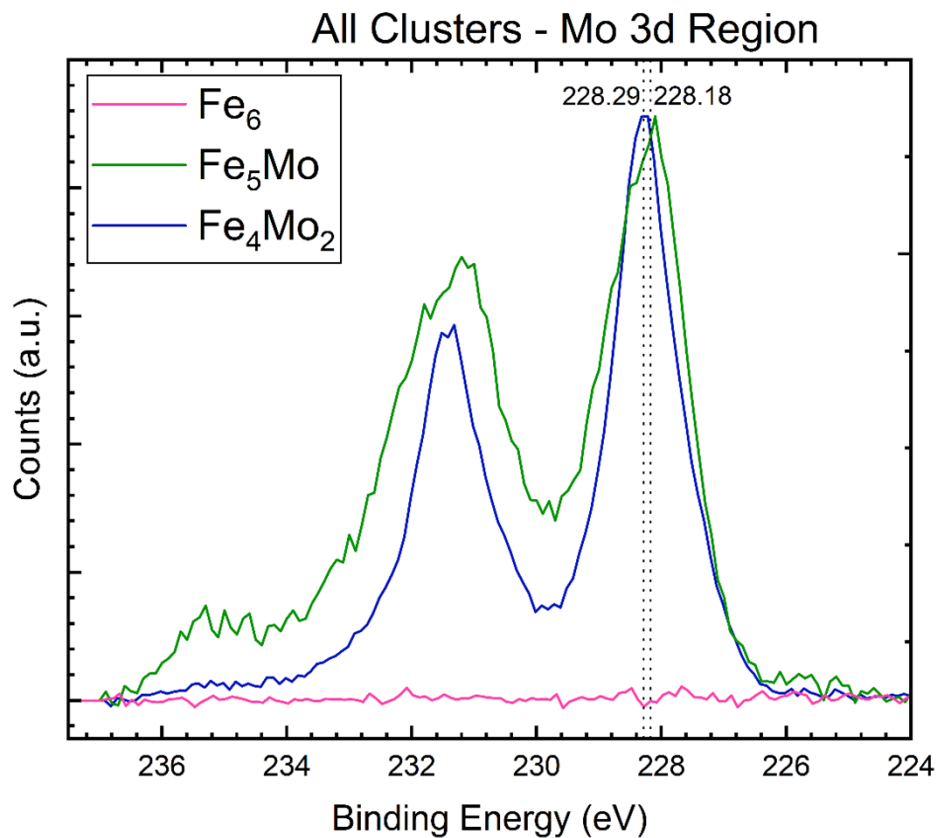

**Figure S28.** High-resolution X-ray photo-electron spectrum (XPS) of the molybdenum 3d regions of  $\text{Fe}_6$  (pink),  $\text{Fe}_5\text{Mo}$  (green) and  $\text{Fe}_4\text{Mo}_2$  (blue).

**Table S1.** Crystal data and structure refinement for **1**.

|                                   |                                                                                                        |                  |
|-----------------------------------|--------------------------------------------------------------------------------------------------------|------------------|
| Identification code               | [Fe <sub>4</sub> ] <sup>2-</sup>                                                                       |                  |
| Empirical formula                 | C <sub>82.50</sub> H <sub>84.50</sub> F <sub>2.50</sub> Fe <sub>6</sub> K <sub>3</sub> O <sub>36</sub> |                  |
| Formula weight                    | 2151.90                                                                                                |                  |
| Temperature                       | 100.15 K                                                                                               |                  |
| Wavelength                        | 1.54184 Å                                                                                              |                  |
| Crystal system                    | triclinic                                                                                              |                  |
| Space group                       | P -1                                                                                                   |                  |
| Unit cell dimensions              | a = 11.2695(7) Å                                                                                       | a = 113.941(6)°. |
|                                   | b = 20.7691(14) Å                                                                                      | b = 101.028(5)°. |
|                                   | c = 22.4933(12) Å                                                                                      | g = 95.660(6)°.  |
| Volume                            | 4630.9(6) Å <sup>3</sup>                                                                               |                  |
| Z                                 | 2                                                                                                      |                  |
| Density (calculated)              | 1.543 Mg/m <sup>3</sup>                                                                                |                  |
| Absorption coefficient            | 9.323 mm <sup>-1</sup>                                                                                 |                  |
| F(000)                            | 2206                                                                                                   |                  |
| Crystal size                      | 0.12 x 0.089 x 0.038 mm <sup>3</sup>                                                                   |                  |
| Theta range for data collection   | 3.896 to 69.080°.                                                                                      |                  |
| Index ranges                      | -13 ≤ h ≤ 11, -25 ≤ k ≤ 24, -27 ≤ l ≤ 24                                                               |                  |
| Reflections collected             | 33287                                                                                                  |                  |
| Independent reflections           | 16876 [R(int) = 0.1168]                                                                                |                  |
| Completeness to theta = 67.684°   | 99.4 %                                                                                                 |                  |
| Absorption correction             | Semi-empirical from equivalents                                                                        |                  |
| Max. and min. transmission        | 1.00000 and 0.79418                                                                                    |                  |
| Refinement method                 | Full-matrix least-squares on F <sup>2</sup>                                                            |                  |
| Data / restraints / parameters    | 16876 / 1551 / 1450                                                                                    |                  |
| Goodness-of-fit on F <sup>2</sup> | 0.941                                                                                                  |                  |
| Final R indices [I > 2σ(I)]       | R1 = 0.0695, wR2 = 0.1270                                                                              |                  |
| R indices (all data)              | R1 = 0.1498, wR2 = 0.1553                                                                              |                  |
| Extinction coefficient            | n/a                                                                                                    |                  |
| Largest diff. peak and hole       | 0.691 and -0.592 e.Å <sup>-3</sup>                                                                     |                  |

**Table S2.** Atomic coordinates ( $\times 10^4$ ) and equivalent isotropic displacement parameters ( $\text{\AA}^2 \times 10^3$ ) for **1**.  $U_{\text{eq}}$  is defined as one third of the trace of the orthogonalized  $U^{ij}$  tensor.

|      | x       | y        | z       | U(eq) |
|------|---------|----------|---------|-------|
| Fe1B | 8294(1) | 7509(1)  | 8561(1) | 37(1) |
| Fe3B | 7322(1) | 6422(1)  | 8739(1) | 40(1) |
| Fe2B | 6925(1) | 5679(1)  | 7423(1) | 48(1) |
| Fe4B | 9156(1) | 6311(1)  | 8229(1) | 44(1) |
| K2   | 4680(1) | 8728(1)  | 8011(1) | 34(1) |
| K1   | 3183(1) | 8159(1)  | 6072(1) | 40(1) |
| K3   | 7770(1) | 3606(1)  | 8190(1) | 43(1) |
| O7   | 3104(4) | 8844(2)  | 8813(2) | 32(1) |
| O8   | 3006(4) | 7534(2)  | 7750(2) | 38(1) |
| O9   | 4368(4) | 7467(2)  | 6759(2) | 37(1) |
| O10  | 6599(4) | 8509(3)  | 7446(2) | 38(1) |
| O11  | 6683(4) | 9844(2)  | 8511(2) | 38(1) |
| O12  | 4789(4) | 9941(2)  | 9156(2) | 35(1) |
| C17  | 2720(6) | 9490(3)  | 9057(3) | 32(2) |
| C18  | 2242(6) | 8206(3)  | 8671(3) | 35(2) |
| C19  | 2860(6) | 7583(4)  | 8382(3) | 38(2) |
| C20  | 3505(6) | 6922(3)  | 7398(3) | 37(2) |
| C21  | 3517(6) | 6876(4)  | 6725(3) | 38(2) |
| C22  | 5569(6) | 7305(4)  | 6699(4) | 44(2) |
| C23  | 6377(6) | 7967(4)  | 6778(3) | 44(2) |
| C24  | 7425(6) | 9147(4)  | 7576(4) | 46(2) |
| C25  | 7757(6) | 9602(4)  | 8309(4) | 45(2) |
| C26  | 6899(6) | 10237(4) | 9216(3) | 44(2) |
| C27  | 5778(6) | 10542(4) | 9364(3) | 40(2) |
| C28  | 3639(6) | 10089(3) | 9244(3) | 34(2) |
| C29  | 3374(6) | 10778(4) | 9491(3) | 43(2) |
| C30  | 2175(6) | 10852(4) | 9540(4) | 46(2) |
| C31  | 1267(6) | 10258(4) | 9358(3) | 42(2) |
| C32  | 1537(6) | 9569(4)  | 9109(3) | 37(2) |
| O1   | 3267(4) | 7002(3)  | 4930(2) | 43(1) |
| C1   | 4415(6) | 6906(4)  | 4801(3) | 45(2) |

|      |          |          |          |       |
|------|----------|----------|----------|-------|
| O2   | 1239(4)  | 7011(3)  | 5481(2)  | 46(1) |
| C2   | 2340(6)  | 6359(4)  | 4687(4)  | 51(2) |
| O3   | 1164(4)  | 8319(3)  | 6536(2)  | 46(1) |
| C3   | 1140(7)  | 6594(4)  | 4776(4)  | 54(2) |
| O4   | 3313(4)  | 9394(2)  | 7351(2)  | 38(1) |
| C4   | 102(6)   | 7232(4)  | 5592(4)  | 52(2) |
| O5   | 4768(4)  | 9444(2)  | 6431(2)  | 41(1) |
| C5   | 272(6)   | 7679(4)  | 6326(4)  | 49(2) |
| O6   | 4837(4)  | 8172(2)  | 5320(2)  | 39(1) |
| C6   | 1264(6)  | 8816(4)  | 7196(4)  | 49(2) |
| C7   | 2072(6)  | 9506(4)  | 7349(4)  | 45(2) |
| C8   | 4130(6)  | 10008(4) | 7426(3)  | 43(2) |
| C9   | 4180(7)  | 10020(4) | 6774(4)  | 45(2) |
| C10  | 4973(6)  | 9440(4)  | 5819(4)  | 46(2) |
| C11  | 5643(6)  | 8850(4)  | 5520(3)  | 44(2) |
| C12  | 5253(6)  | 7553(4)  | 5019(3)  | 39(2) |
| C13  | 6411(6)  | 7538(4)  | 4904(3)  | 50(2) |
| C14  | 6739(7)  | 6863(5)  | 4582(4)  | 58(2) |
| C15  | 5917(8)  | 6236(5)  | 4375(4)  | 71(3) |
| C16  | 4744(7)  | 6261(4)  | 4499(4)  | 60(2) |
| O3B  | 6165(4)  | 8187(3)  | 8727(2)  | 45(1) |
| O2B  | 10172(4) | 8506(3)  | 9797(2)  | 48(1) |
| O11B | 11278(5) | 7128(3)  | 9389(3)  | 53(1) |
| O9B  | 7071(5)  | 5008(3)  | 8745(3)  | 57(1) |
| O7B  | 8709(5)  | 7307(3)  | 10133(3) | 52(1) |
| O1B  | 9121(4)  | 7943(3)  | 7606(3)  | 57(2) |
| O12B | 9491(5)  | 4940(3)  | 8269(3)  | 57(1) |
| O13  | 6033(5)  | 3745(3)  | 8993(3)  | 62(2) |
| O14  | 8603(5)  | 4125(3)  | 9595(2)  | 53(1) |
| O15  | 10132(5) | 3484(3)  | 8750(3)  | 53(1) |
| O16  | 9302(5)  | 3000(3)  | 7364(3)  | 54(1) |
| O17  | 6747(5)  | 2502(3)  | 6894(2)  | 50(1) |
| O18  | 5152(4)  | 2867(3)  | 7749(2)  | 48(1) |
| C33  | 5111(7)  | 3173(5)  | 8881(4)  | 57(2) |
| C34  | 6599(8)  | 4270(5)  | 9688(4)  | 65(2) |
| C35  | 7711(7)  | 4054(5)  | 9949(4)  | 61(2) |

|      |           |          |         |       |
|------|-----------|----------|---------|-------|
| C36  | 9717(7)   | 3931(4)  | 9825(4) | 55(2) |
| C37  | 10592(7)  | 4003(4)  | 9423(4) | 58(2) |
| C38  | 10953(7)  | 3486(4)  | 8347(4) | 56(2) |
| C39  | 10447(7)  | 2881(5)  | 7665(4) | 61(2) |
| C40  | 8742(7)   | 2437(4)  | 6710(4) | 59(2) |
| C41  | 7481(7)   | 2543(4)  | 6457(4) | 56(2) |
| C42  | 5510(7)   | 2538(4)  | 6663(4) | 57(2) |
| C43  | 4752(7)   | 2341(4)  | 7064(4) | 56(2) |
| C44  | 4619(7)   | 2730(4)  | 8206(4) | 52(2) |
| C45  | 3622(7)   | 2168(5)  | 8011(5) | 64(2) |
| C46  | 3183(8)   | 2059(5)  | 8509(5) | 74(3) |
| C47  | 3706(9)   | 2479(5)  | 9170(5) | 79(3) |
| C48  | 4672(8)   | 3054(5)  | 9367(5) | 73(3) |
| O10B | 10348(5)  | 6349(3)  | 7187(3) | 66(2) |
| O8B  | 4903(5)   | 6745(3)  | 8931(3) | 58(2) |
| O5B  | 4244(5)   | 5478(3)  | 7039(3) | 68(2) |
| O6B  | 7018(6)   | 4188(3)  | 7213(3) | 76(2) |
| C3B  | 7025(6)   | 7926(4)  | 8670(3) | 41(2) |
| C2B  | 9432(6)   | 8111(4)  | 9320(4) | 37(2) |
| O4B  | 7256(7)   | 5781(4)  | 6202(3) | 99(2) |
| C1B  | 8796(6)   | 7777(4)  | 7994(4) | 40(2) |
| C0B  | 7591(6)   | 6604(4)  | 7982(3) | 39(2) |
| C7B  | 8181(6)   | 6969(4)  | 9568(4) | 42(2) |
| C8B  | 5869(6)   | 6607(4)  | 8834(4) | 42(2) |
| C9B  | 7163(7)   | 5569(4)  | 8721(4) | 49(2) |
| C11B | 10395(7)  | 6827(4)  | 8943(4) | 42(2) |
| C5B  | 5310(8)   | 5573(4)  | 7208(4) | 53(2) |
| C12B | 9336(7)   | 5482(4)  | 8227(4) | 50(2) |
| C10B | 9844(7)   | 6324(4)  | 7584(4) | 50(2) |
| C6B  | 7009(8)   | 4786(4)  | 7299(4) | 60(2) |
| C4B  | 7151(9)   | 5715(5)  | 6697(5) | 70(3) |
| Fe1A | -274(2)   | 9049(1)  | 5020(1) | 39(1) |
| Fe3A | -1188(2)  | 10185(1) | 5104(1) | 39(1) |
| Fe2A | 1131(2)   | 10868(1) | 5730(1) | 44(1) |
| Fe4A | 521(2)    | 9888(1)  | 4485(1) | 41(1) |
| O1A  | -1095(16) | 9001(9)  | 6168(6) | 44(4) |

|      |           |           |          |        |
|------|-----------|-----------|----------|--------|
| O2A  | -1825(9)  | 7814(5)   | 3803(5)  | 51(3)  |
| O12A | -1264(16) | 8932(10)  | 3190(9)  | 58(4)  |
| O9A  | -1690(30) | 11354(13) | 4770(16) | 70(9)  |
| O8A  | -3440(20) | 9072(11)  | 4137(11) | 38(5)  |
| O3A  | 1914(19)  | 8464(10)  | 5147(12) | 38(4)  |
| O11A | 1044(17)  | 11089(11) | 4144(8)  | 44(6)  |
| O10A | 2790(9)   | 9330(5)   | 4286(5)  | 47(2)  |
| O7A  | -2208(10) | 10511(6)  | 6261(6)  | 57(3)  |
| O5A  | 1033(9)   | 12283(4)  | 5768(5)  | 59(3)  |
| C1A  | -780(20)  | 8986(16)  | 5698(14) | 36(6)  |
| C2A  | -1280(40) | 8280(13)  | 4270(30) | 47(7)  |
| O4A  | 3690(20)  | 10772(12) | 5778(14) | 51(6)  |
| C3A  | 1108(17)  | 8679(13)  | 5095(11) | 42(5)  |
| C0A  | 434(10)   | 9947(6)   | 5371(6)  | 27(3)  |
| C8A  | -2442(15) | 9508(8)   | 4518(8)  | 36(4)  |
| C7A  | -1810(20) | 10388(12) | 5797(11) | 39(5)  |
| C9A  | -1382(13) | 10893(8)  | 4904(7)  | 40(3)  |
| C12A | -532(15)  | 9345(9)   | 3728(8)  | 43(4)  |
| C11A | 804(13)   | 10623(8)  | 4296(7)  | 36(4)  |
| C10A | 1860(30)  | 9542(14)  | 4386(13) | 50(7)  |
| C5A  | 1080(40)  | 11715(12) | 5740(30) | 45(7)  |
| C4A  | 2749(17)  | 10865(12) | 5763(12) | 46(5)  |
| C6A  | 1010(30)  | 10973(18) | 6531(7)  | 58(8)  |
| O6A  | 1015(14)  | 11010(9)  | 7055(5)  | 62(4)  |
| F1D  | 1186(9)   | 3821(6)   | 6492(5)  | 116(4) |
| C1D  | 1951(13)  | 4194(8)   | 7096(6)  | 79(4)  |
| C2D  | 1800(16)  | 4877(8)   | 7502(8)  | 83(5)  |
| C3D  | 2643(17)  | 5290(9)   | 8119(8)  | 82(4)  |
| C4D  | 3636(16)  | 5019(11)  | 8330(7)  | 75(3)  |
| C5D  | 3786(14)  | 4335(12)  | 7924(8)  | 73(3)  |
| C6D  | 2944(13)  | 3923(9)   | 7307(7)  | 70(4)  |
| F1DA | 4232(15)  | 5253(10)  | 8930(8)  | 117(5) |
| C1DA | 3440(30)  | 4953(19)  | 8319(10) | 76(4)  |
| C6DA | 3810(20)  | 4356(19)  | 7883(14) | 71(4)  |
| C5DA | 3130(20)  | 3985(14)  | 7216(12) | 64(8)  |
| C4DA | 2090(20)  | 4210(14)  | 6986(9)  | 84(6)  |

|      |           |          |          |        |
|------|-----------|----------|----------|--------|
| C3DA | 1730(20)  | 4806(14) | 7422(13) | 64(8)  |
| C2DA | 2400(30)  | 5178(15) | 8089(12) | 86(6)  |
| F1E  | -2139(11) | 5120(10) | 4709(8)  | 80(5)  |
| C1E  | -1002(13) | 5039(13) | 4879(8)  | 53(4)  |
| C2E  | -350(15)  | 5360(14) | 5551(8)  | 50(4)  |
| C3E  | 852(15)   | 5272(15) | 5732(10) | 53(4)  |
| C4E  | 1402(13)  | 4862(14) | 5240(12) | 55(4)  |
| C5E  | 749(16)   | 4541(14) | 4568(11) | 54(4)  |
| C6E  | -452(16)  | 4629(13) | 4387(8)  | 54(4)  |
| F1EA | 1650(20)  | 5391(14) | 6059(12) | 76(6)  |
| C1EA | 720(20)   | 5250(20) | 5501(13) | 54(4)  |
| C6EA | 900(20)   | 4839(18) | 4870(17) | 55(4)  |
| C5EA | -50(30)   | 4640(18) | 4296(13) | 53(4)  |
| C4EA | -1180(30) | 4850(20) | 4353(13) | 52(5)  |
| C3EA | -1350(20) | 5260(20) | 4984(16) | 53(4)  |
| C2EA | -400(30)  | 5460(20) | 5558(12) | 52(4)  |
| F1F  | 10074(10) | 513(6)   | 7824(6)  | 131(4) |
| C1F  | 9269(9)   | 933(6)   | 7922(5)  | 83(3)  |
| C2F  | 8350(10)  | 875(6)   | 7383(4)  | 84(3)  |
| C3F  | 7438(9)   | 1281(7)  | 7497(5)  | 85(3)  |
| C4F  | 7443(10)  | 1746(6)  | 8149(6)  | 87(3)  |
| C5F  | 8361(12)  | 1804(6)  | 8689(5)  | 86(3)  |
| C6F  | 9274(10)  | 1398(6)  | 8575(4)  | 83(3)  |
| F1FA | 6663(17)  | 2051(10) | 9315(9)  | 174(7) |
| C1FA | 7325(14)  | 1875(8)  | 8855(7)  | 80(3)  |
| C2FA | 8566(14)  | 1845(8)  | 9016(6)  | 82(4)  |
| C3FA | 9152(10)  | 1537(9)  | 8507(8)  | 84(3)  |
| C4FA | 8497(14)  | 1259(8)  | 7838(7)  | 83(3)  |
| C5FA | 7256(13)  | 1288(8)  | 7676(6)  | 87(3)  |
| C6FA | 6670(10)  | 1596(8)  | 8185(8)  | 81(3)  |

---

**Table S3.** Bond lengths (Å) and angles (°) for **1**.

|           |            |         |          |
|-----------|------------|---------|----------|
| Fe1B-Fe3B | 2.6198(15) | K1-O1   | 2.740(5) |
| Fe1B-Fe4B | 2.6337(16) | K1-O2   | 2.745(5) |
| Fe1B-C3B  | 1.749(7)   | K1-O3   | 2.675(5) |
| Fe1B-C2B  | 1.799(7)   | K1-O4   | 2.943(5) |
| Fe1B-C1B  | 1.746(7)   | K1-C4   | 3.534(7) |
| Fe1B-C0B  | 1.784(7)   | K1-O5   | 2.779(5) |
| Fe3B-Fe2B | 2.6437(17) | K1-O6   | 2.751(4) |
| Fe3B-Fe4B | 2.5352(16) | K1-C9   | 3.494(7) |
| Fe3B-C0B  | 1.956(7)   | K1-C10  | 3.475(7) |
| Fe3B-C7B  | 1.755(8)   | K1-O3A  | 2.62(2)  |
| Fe3B-C8B  | 1.751(7)   | K1-C3A  | 3.45(2)  |
| Fe3B-C9B  | 1.747(7)   | K3-O9B  | 2.922(5) |
| Fe2B-Fe4B | 2.6468(18) | K3-O12B | 3.143(6) |
| Fe2B-C0B  | 1.796(7)   | K3-O13  | 2.867(6) |
| Fe2B-C5B  | 1.759(8)   | K3-O14  | 2.815(5) |
| Fe2B-C6B  | 1.776(8)   | K3-O15  | 2.802(5) |
| Fe2B-C4B  | 1.728(9)   | K3-O16  | 2.789(5) |
| Fe4B-C0B  | 1.974(7)   | K3-O17  | 2.802(5) |
| Fe4B-C11B | 1.769(8)   | K3-O18  | 2.965(5) |
| Fe4B-C12B | 1.752(7)   | K3-O6B  | 2.941(6) |
| Fe4B-C10B | 1.777(7)   | O7-C17  | 1.377(7) |
| K2-O7     | 2.726(4)   | O7-C18  | 1.444(7) |
| K2-O8     | 2.742(5)   | O8-C19  | 1.427(7) |
| K2-O9     | 2.893(5)   | O8-C20  | 1.434(7) |
| K2-O10    | 2.696(4)   | O9-C21  | 1.449(7) |
| K2-O11    | 2.760(5)   | O9-C22  | 1.443(7) |
| K2-O12    | 2.748(5)   | O10-C23 | 1.420(8) |
| K2-C19    | 3.444(7)   | O10-C24 | 1.431(8) |
| K2-C20    | 3.441(7)   | O11-C25 | 1.438(7) |
| K2-C26    | 3.520(7)   | O11-C26 | 1.415(7) |
| K2-O4     | 2.776(4)   | O12-C27 | 1.439(7) |
| K2-C8     | 3.471(7)   | O12-C28 | 1.393(7) |
| K2-O3B    | 2.731(5)   | C17-C28 | 1.398(9) |
| K1-O9     | 2.760(4)   | C17-C32 | 1.381(9) |

|          |           |          |           |
|----------|-----------|----------|-----------|
| C18-H18A | 0.99      | C1-C16   | 1.360(10) |
| C18-H18B | 0.99      | O2-C3    | 1.441(8)  |
| C18-C19  | 1.500(8)  | O2-C4    | 1.435(8)  |
| C19-H19A | 0.99      | C2-H2A   | 0.99      |
| C19-H19B | 0.99      | C2-H2B   | 0.99      |
| C20-H20A | 0.99      | C2-C3    | 1.504(10) |
| C20-H20B | 0.99      | O3-C5    | 1.431(8)  |
| C20-C21  | 1.479(8)  | O3-C6    | 1.398(8)  |
| C21-H21A | 0.99      | C3-H3A   | 0.99      |
| C21-H21B | 0.99      | C3-H3B   | 0.99      |
| C22-H22A | 0.99      | O4-C7    | 1.439(7)  |
| C22-H22B | 0.99      | O4-C8    | 1.428(8)  |
| C22-C23  | 1.497(10) | C4-H4A   | 0.99      |
| C23-H23A | 0.99      | C4-H4B   | 0.99      |
| C23-H23B | 0.99      | C4-C5    | 1.491(10) |
| C24-H24A | 0.99      | O5-C9    | 1.439(8)  |
| C24-H24B | 0.99      | O5-C10   | 1.435(7)  |
| C24-C25  | 1.477(9)  | C5-H5A   | 0.99      |
| C25-H25A | 0.99      | C5-H5B   | 0.99      |
| C25-H25B | 0.99      | O6-C11   | 1.445(7)  |
| C26-H26A | 0.99      | O6-C12   | 1.366(8)  |
| C26-H26B | 0.99      | C6-H6A   | 0.99      |
| C26-C27  | 1.503(9)  | C6-H6B   | 0.99      |
| C27-H27A | 0.99      | C6-C7    | 1.491(10) |
| C27-H27B | 0.99      | C7-H7A   | 0.99      |
| C28-C29  | 1.396(9)  | C7-H7B   | 0.99      |
| C29-H29  | 0.95      | C8-H8A   | 0.99      |
| C29-C30  | 1.394(9)  | C8-H8B   | 0.99      |
| C30-H30  | 0.95      | C8-C9    | 1.489(9)  |
| C30-C31  | 1.384(9)  | C9-H9A   | 0.99      |
| C31-H31  | 0.95      | C9-H9B   | 0.99      |
| C31-C32  | 1.398(9)  | C10-H10A | 0.99      |
| C32-H32  | 0.95      | C10-H10B | 0.99      |
| O1-C1    | 1.394(8)  | C10-C11  | 1.494(9)  |
| O1-C2    | 1.446(8)  | C11-H11A | 0.99      |
| C1-C12   | 1.406(10) | C11-H11B | 0.99      |

|           |           |           |           |
|-----------|-----------|-----------|-----------|
| C12-C13   | 1.379(9)  | C36-C37   | 1.496(10) |
| C13-H13   | 0.95      | C37-H37A  | 0.99      |
| C13-C14   | 1.415(10) | C37-H37B  | 0.99      |
| C14-H14   | 0.95      | C38-H38A  | 0.99      |
| C14-C15   | 1.370(12) | C38-H38B  | 0.99      |
| C15-H15   | 0.95      | C38-C39   | 1.489(10) |
| C15-C16   | 1.404(11) | C39-H39A  | 0.99      |
| C16-H16   | 0.95      | C39-H39B  | 0.99      |
| O3B-C3B   | 1.160(8)  | C40-H40A  | 0.99      |
| O2B-C2B   | 1.152(8)  | C40-H40B  | 0.99      |
| O11B-C11B | 1.171(8)  | C40-C41   | 1.500(10) |
| O9B-C9B   | 1.182(8)  | C41-H41A  | 0.99      |
| O7B-C7B   | 1.169(8)  | C41-H41B  | 0.99      |
| O1B-C1B   | 1.164(8)  | C42-H42A  | 0.99      |
| O12B-C12B | 1.194(8)  | C42-H42B  | 0.99      |
| O13-C33   | 1.404(9)  | C42-C43   | 1.496(10) |
| O13-C34   | 1.462(9)  | C43-H43A  | 0.99      |
| O14-C35   | 1.428(9)  | C43-H43B  | 0.99      |
| O14-C36   | 1.424(8)  | C44-C45   | 1.397(10) |
| O15-C37   | 1.409(9)  | C45-H45   | 0.95      |
| O15-C38   | 1.415(8)  | C45-C46   | 1.394(11) |
| O16-C39   | 1.430(8)  | C46-H46   | 0.95      |
| O16-C40   | 1.426(8)  | C46-C47   | 1.354(12) |
| O17-C41   | 1.423(8)  | C47-H47   | 0.95      |
| O17-C42   | 1.412(8)  | C47-C48   | 1.392(12) |
| O18-C43   | 1.428(8)  | C48-H48   | 0.95      |
| O18-C44   | 1.393(9)  | O10B-C10B | 1.162(8)  |
| C33-C44   | 1.378(11) | O8B-C8B   | 1.191(8)  |
| C33-C48   | 1.380(11) | O5B-C5B   | 1.159(9)  |
| C34-H34A  | 0.99      | O6B-C6B   | 1.179(9)  |
| C34-H34B  | 0.99      | O4B-C4B   | 1.202(9)  |
| C34-C35   | 1.469(10) | Fe1A-Fe3A | 2.617(3)  |
| C35-H35A  | 0.99      | Fe1A-Fe4A | 2.663(3)  |
| C35-H35B  | 0.99      | Fe1A-C1A  | 1.77(2)   |
| C36-H36A  | 0.99      | Fe1A-C2A  | 1.85(4)   |
| C36-H36B  | 0.99      | Fe1A-C3A  | 1.81(2)   |

|           |           |           |          |
|-----------|-----------|-----------|----------|
| Fe1A-C0A  | 1.733(11) | C4D-C5D   | 1.39     |
| Fe3A-Fe2A | 2.657(3)  | C5D-H5D   | 0.95     |
| Fe3A-Fe4A | 2.567(3)  | C5D-C6D   | 1.39     |
| Fe3A-C0A  | 1.987(12) | C6D-H6D   | 0.95     |
| Fe3A-C8A  | 1.762(16) | F1DA-C1DA | 1.34(2)  |
| Fe3A-C7A  | 1.74(2)   | C1DA-C6DA | 1.39     |
| Fe3A-C9A  | 1.725(14) | C1DA-C2DA | 1.39     |
| Fe2A-Fe4A | 2.611(3)  | C6DA-H6DA | 0.95     |
| Fe2A-C0A  | 1.771(12) | C6DA-C5DA | 1.39     |
| Fe2A-C5A  | 1.760(8)  | C5DA-H5DA | 0.95     |
| Fe2A-C4A  | 1.811(19) | C5DA-C4DA | 1.39     |
| Fe2A-C6A  | 1.758(8)  | C4DA-H4DA | 0.95     |
| Fe4A-C0A  | 1.969(12) | C4DA-C3DA | 1.39     |
| Fe4A-C12A | 1.728(17) | C3DA-H3DA | 0.95     |
| Fe4A-C11A | 1.758(15) | C3DA-C2DA | 1.39     |
| Fe4A-C10A | 1.74(3)   | C2DA-H2DA | 0.95     |
| O1A-C1A   | 1.17(3)   | F1E-C1E   | 1.312(6) |
| O2A-C2A   | 1.11(5)   | C1E-C2E   | 1.39     |
| O12A-C12A | 1.23(2)   | C1E-C6E   | 1.39     |
| O9A-C9A   | 1.18(3)   | C2E-H2E   | 0.95     |
| O8A-C8A   | 1.27(3)   | C2E-C3E   | 1.39     |
| O3A-C3A   | 1.06(3)   | C3E-H3E   | 0.95     |
| O11A-C11A | 1.17(2)   | C3E-C4E   | 1.39     |
| O10A-C10A | 1.21(3)   | C4E-H4E   | 0.95     |
| O7A-C7A   | 1.16(2)   | C4E-C5E   | 1.39     |
| O5A-C5A   | 1.160(8)  | C5E-H5E   | 0.95     |
| O4A-C4A   | 1.09(3)   | C5E-C6E   | 1.39     |
| C6A-O6A   | 1.150(8)  | C6E-H6E   | 0.95     |
| F1D-C1D   | 1.324(6)  | F1EA-C1EA | 1.38(3)  |
| C1D-C2D   | 1.39      | C1EA-C6EA | 1.39     |
| C1D-C6D   | 1.39      | C1EA-C2EA | 1.39     |
| C2D-H2D   | 0.95      | C6EA-H6EA | 0.95     |
| C2D-C3D   | 1.39      | C6EA-C5EA | 1.39     |
| C3D-H3D   | 0.95      | C5EA-H5EA | 0.95     |
| C3D-C4D   | 1.39      | C5EA-C4EA | 1.39     |
| C4D-H4D   | 0.95      | C4EA-H4EA | 0.95     |

|           |          |           |         |
|-----------|----------|-----------|---------|
| C4EA-C3EA | 1.39     | C5F-C6F   | 1.39    |
| C3EA-H3EA | 0.95     | C6F-H6F   | 0.95    |
| C3EA-C2EA | 1.39     | F1FA-C1FA | 1.34(2) |
| C2EA-H2EA | 0.95     | C1FA-C2FA | 1.39    |
| F1F-C1F   | 1.307(6) | C1FA-C6FA | 1.39    |
| C1F-C2F   | 1.39     | C2FA-H2FA | 0.95    |
| C1F-C6F   | 1.39     | C2FA-C3FA | 1.39    |
| C2F-H2F   | 0.95     | C3FA-H3FA | 0.95    |
| C2F-C3F   | 1.39     | C3FA-C4FA | 1.39    |
| C3F-H3F   | 0.95     | C4FA-H4FA | 0.95    |
| C3F-C4F   | 1.39     | C4FA-C5FA | 1.39    |
| C4F-H4F   | 0.95     | C5FA-H5FA | 0.95    |
| C4F-C5F   | 1.39     | C5FA-C6FA | 1.39    |
| C5F-H5F   | 0.95     | C6FA-H6FA | 0.95    |

|                |          |
|----------------|----------|
| Fe3B-Fe1B-Fe4B | 57.71(4) |
| C3B-Fe1B-Fe3B  | 93.5(2)  |
| C3B-Fe1B-Fe4B  | 147.9(2) |
| C3B-Fe1B-C2B   | 100.7(3) |
| C3B-Fe1B-C0B   | 102.8(3) |
| C2B-Fe1B-Fe3B  | 108.6(2) |
| C2B-Fe1B-Fe4B  | 101.9(2) |
| C1B-Fe1B-Fe3B  | 145.5(2) |
| C1B-Fe1B-Fe4B  | 97.4(2)  |
| C1B-Fe1B-C3B   | 101.1(3) |
| C1B-Fe1B-C2B   | 99.3(3)  |
| C1B-Fe1B-C0B   | 97.6(3)  |
| C0B-Fe1B-Fe3B  | 48.3(2)  |
| C0B-Fe1B-Fe4B  | 48.5(2)  |
| C0B-Fe1B-C2B   | 147.7(3) |
| Fe1B-Fe3B-Fe2B | 85.69(5) |
| Fe4B-Fe3B-Fe1B | 61.42(4) |
| Fe4B-Fe3B-Fe2B | 61.43(5) |
| C0B-Fe3B-Fe1B  | 42.9(2)  |
| C0B-Fe3B-Fe2B  | 42.8(2)  |
| C0B-Fe3B-Fe4B  | 50.1(2)  |
| C7B-Fe3B-Fe1B  | 81.3(2)  |
| C7B-Fe3B-Fe2B  | 157.0(2) |
| C7B-Fe3B-Fe4B  | 95.6(2)  |
| C7B-Fe3B-C0B   | 122.0(3) |
| C8B-Fe3B-Fe1B  | 102.5(2) |
| C8B-Fe3B-Fe2B  | 103.0(2) |
| C8B-Fe3B-Fe4B  | 156.8(2) |
| C8B-Fe3B-C0B   | 106.6(3) |
| C8B-Fe3B-C7B   | 98.4(3)  |
| C9B-Fe3B-Fe1B  | 156.8(3) |
| C9B-Fe3B-Fe2B  | 83.0(3)  |
| C9B-Fe3B-Fe4B  | 95.4(3)  |
| C9B-Fe3B-C0B   | 123.2(3) |
| C9B-Fe3B-C7B   | 102.0(3) |
| C9B-Fe3B-C8B   | 99.7(4)  |

|                |          |
|----------------|----------|
| Fe3B-Fe2B-Fe4B | 57.27(4) |
| C0B-Fe2B-Fe3B  | 47.7(2)  |
| C0B-Fe2B-Fe4B  | 48.2(2)  |
| C5B-Fe2B-Fe3B  | 98.2(3)  |
| C5B-Fe2B-Fe4B  | 153.6(3) |
| C5B-Fe2B-C0B   | 109.3(3) |
| C5B-Fe2B-C6B   | 98.0(4)  |
| C6B-Fe2B-Fe3B  | 104.9(3) |
| C6B-Fe2B-Fe4B  | 97.9(3)  |
| C6B-Fe2B-C0B   | 142.8(4) |
| C4B-Fe2B-Fe3B  | 144.4(3) |
| C4B-Fe2B-Fe4B  | 99.6(3)  |
| C4B-Fe2B-C0B   | 96.8(4)  |
| C4B-Fe2B-C5B   | 96.6(4)  |
| C4B-Fe2B-C6B   | 104.9(4) |
| Fe1B-Fe4B-Fe2B | 85.35(5) |
| Fe3B-Fe4B-Fe1B | 60.87(4) |
| Fe3B-Fe4B-Fe2B | 61.31(5) |
| C0B-Fe4B-Fe1B  | 42.6(2)  |
| C0B-Fe4B-Fe3B  | 49.5(2)  |
| C0B-Fe4B-Fe2B  | 42.7(2)  |
| C11B-Fe4B-Fe1B | 84.8(2)  |
| C11B-Fe4B-Fe3B | 101.9(2) |
| C11B-Fe4B-Fe2B | 163.2(2) |
| C11B-Fe4B-C0B  | 126.2(3) |
| C11B-Fe4B-C10B | 99.9(4)  |
| C12B-Fe4B-Fe1B | 155.6(3) |
| C12B-Fe4B-Fe3B | 95.4(3)  |
| C12B-Fe4B-Fe2B | 88.0(3)  |
| C12B-Fe4B-C0B  | 126.9(3) |
| C12B-Fe4B-C11B | 95.4(3)  |
| C12B-Fe4B-C10B | 103.1(4) |
| C10B-Fe4B-Fe1B | 100.9(2) |
| C10B-Fe4B-Fe3B | 149.7(3) |
| C10B-Fe4B-Fe2B | 95.3(3)  |
| C10B-Fe4B-C0B  | 100.4(3) |

|            |            |
|------------|------------|
| O7-K2-O8   | 60.96(13)  |
| O7-K2-O9   | 122.06(13) |
| O7-K2-O11  | 115.82(14) |
| O7-K2-O12  | 55.78(12)  |
| O7-K2-C19  | 43.04(13)  |
| O7-K2-C20  | 82.64(14)  |
| O7-K2-C26  | 94.85(15)  |
| O7-K2-O4   | 91.27(13)  |
| O7-K2-C8   | 103.47(15) |
| O7-K2-O3B  | 89.54(14)  |
| O8-K2-O9   | 62.03(13)  |
| O8-K2-O11  | 165.93(14) |
| O8-K2-O12  | 116.47(13) |
| O8-K2-C19  | 23.34(14)  |
| O8-K2-C20  | 23.52(13)  |
| O8-K2-C26  | 147.66(15) |
| O8-K2-O4   | 102.43(13) |
| O8-K2-C8   | 125.58(15) |
| O9-K2-C19  | 83.66(14)  |
| O9-K2-C20  | 44.19(13)  |
| O9-K2-C26  | 141.54(15) |
| O9-K2-C8   | 100.81(14) |
| O10-K2-O7  | 164.90(14) |
| O10-K2-O8  | 117.08(14) |
| O10-K2-O9  | 61.17(13)  |
| O10-K2-O11 | 62.01(14)  |
| O10-K2-O12 | 122.17(14) |
| O10-K2-C19 | 129.58(15) |
| O10-K2-C20 | 93.74(15)  |
| O10-K2-C26 | 80.38(15)  |
| O10-K2-O4  | 103.59(13) |
| O10-K2-C8  | 89.68(15)  |
| O10-K2-O3B | 75.43(14)  |
| O11-K2-O9  | 121.99(13) |
| O11-K2-C19 | 145.44(15) |
| O11-K2-C20 | 149.80(15) |

|            |            |
|------------|------------|
| O11-K2-C26 | 22.08(13)  |
| O11-K2-O4  | 91.16(13)  |
| O11-K2-C8  | 68.15(15)  |
| O12-K2-O9  | 175.23(13) |
| O12-K2-O11 | 60.67(13)  |
| O12-K2-C19 | 95.66(14)  |
| O12-K2-C20 | 135.79(14) |
| O12-K2-C26 | 42.04(14)  |
| O12-K2-O4  | 84.66(13)  |
| O12-K2-C8  | 76.27(15)  |
| C19-K2-C26 | 124.61(16) |
| C19-K2-C8  | 134.28(16) |
| C20-K2-C19 | 40.44(15)  |
| C20-K2-C26 | 147.77(17) |
| C20-K2-C8  | 133.56(16) |
| O4-K2-O9   | 91.24(13)  |
| O4-K2-C19  | 112.68(15) |
| O4-K2-C20  | 113.16(15) |
| O4-K2-C26  | 98.99(16)  |
| O4-K2-C8   | 23.19(14)  |
| C8-K2-C26  | 78.39(17)  |
| O3B-K2-O8  | 82.34(14)  |
| O3B-K2-O9  | 92.60(14)  |
| O3B-K2-O11 | 83.97(14)  |
| O3B-K2-O12 | 91.64(14)  |
| O3B-K2-C19 | 71.12(15)  |
| O3B-K2-C20 | 71.92(15)  |
| O3B-K2-C26 | 75.94(16)  |
| O3B-K2-O4  | 174.91(15) |
| O3B-K2-C8  | 152.08(16) |
| O9-K1-O4   | 90.50(13)  |
| O9-K1-C4   | 101.25(16) |
| O9-K1-O5   | 106.94(14) |
| O9-K1-C9   | 115.82(15) |
| O9-K1-C10  | 118.12(15) |
| O9-K1-C3A  | 166.0(4)   |

|           |            |
|-----------|------------|
| O1-K1-O9  | 85.67(14)  |
| O1-K1-O2  | 61.40(15)  |
| O1-K1-O4  | 174.99(14) |
| O1-K1-C4  | 81.00(17)  |
| O1-K1-O5  | 117.23(14) |
| O1-K1-O6  | 55.94(13)  |
| O1-K1-C9  | 136.21(15) |
| O1-K1-C10 | 96.43(16)  |
| O1-K1-C3A | 89.1(4)    |
| O2-K1-O9  | 88.85(14)  |
| O2-K1-O4  | 121.82(14) |
| O2-K1-C4  | 22.19(17)  |
| O2-K1-O5  | 164.15(14) |
| O2-K1-O6  | 116.05(15) |
| O2-K1-C9  | 147.76(16) |
| O2-K1-C10 | 144.83(16) |
| O2-K1-C3A | 77.2(4)    |
| O3-K1-O9  | 101.47(14) |
| O3-K1-O1  | 123.19(16) |
| O3-K1-O2  | 62.49(16)  |
| O3-K1-O4  | 60.75(14)  |
| O3-K1-C4  | 42.21(17)  |
| O3-K1-O5  | 114.09(16) |
| O3-K1-O6  | 160.62(15) |
| O3-K1-C9  | 91.06(16)  |
| O3-K1-C10 | 125.97(17) |
| O3-K1-C3A | 70.7(4)    |
| O4-K1-C4  | 102.95(16) |
| O4-K1-C9  | 43.44(14)  |
| O4-K1-C10 | 82.53(15)  |
| O4-K1-C3A | 95.3(4)    |
| O5-K1-O4  | 60.89(13)  |
| O5-K1-C4  | 147.14(17) |
| O5-K1-C9  | 23.12(14)  |
| O5-K1-C10 | 23.28(14)  |
| O5-K1-C3A | 87.0(4)    |

|             |            |
|-------------|------------|
| O6-K1-O9    | 97.78(14)  |
| O6-K1-O4    | 121.62(14) |
| O6-K1-C4    | 131.05(16) |
| O6-K1-O5    | 61.44(14)  |
| O6-K1-C9    | 82.50(15)  |
| O6-K1-C10   | 43.05(15)  |
| O6-K1-C3A   | 90.0(4)    |
| C9-K1-C4    | 126.21(18) |
| C10-K1-C4   | 140.33(17) |
| C10-K1-C9   | 40.08(16)  |
| O3A-K1-O9   | 164.4(4)   |
| O3A-K1-O1   | 79.5(4)    |
| O3A-K1-O2   | 79.7(5)    |
| O3A-K1-O3   | 82.8(5)    |
| O3A-K1-O4   | 104.6(4)   |
| O3A-K1-C4   | 71.7(5)    |
| O3A-K1-O5   | 84.5(5)    |
| O3A-K1-O6   | 78.1(5)    |
| O3A-K1-C9   | 78.8(4)    |
| O3A-K1-C10  | 69.0(5)    |
| O3A-K1-C3A  | 12.5(6)    |
| C3A-K1-C4   | 65.0(4)    |
| C3A-K1-C9   | 76.6(4)    |
| C3A-K1-C10  | 75.4(4)    |
| O9B-K3-O12B | 61.59(14)  |
| O9B-K3-O18  | 91.01(15)  |
| O9B-K3-O6B  | 64.99(16)  |
| O13-K3-O9B  | 63.92(15)  |
| O13-K3-O12B | 122.58(15) |
| O13-K3-O18  | 52.16(15)  |
| O13-K3-O6B  | 109.85(18) |
| O14-K3-O9B  | 74.97(15)  |
| O14-K3-O12B | 89.53(15)  |
| O14-K3-O13  | 59.78(15)  |
| O14-K3-O18  | 109.14(15) |
| O14-K3-O6B  | 137.84(17) |

|             |            |
|-------------|------------|
| O15-K3-O9B  | 118.09(16) |
| O15-K3-O12B | 76.55(14)  |
| O15-K3-O13  | 116.16(16) |
| O15-K3-O14  | 60.49(15)  |
| O15-K3-O18  | 141.30(15) |
| O15-K3-O6B  | 129.05(18) |
| O16-K3-O9B  | 135.37(16) |
| O16-K3-O12B | 76.05(15)  |
| O16-K3-O13  | 160.67(17) |
| O16-K3-O14  | 120.25(16) |
| O16-K3-O15  | 59.77(16)  |
| O16-K3-O17  | 60.12(16)  |
| O16-K3-O18  | 117.44(16) |
| O16-K3-O6B  | 83.00(17)  |
| O17-K3-O9B  | 126.02(15) |
| O17-K3-O12B | 115.49(15) |
| O17-K3-O13  | 110.05(16) |
| O17-K3-O14  | 152.43(16) |
| O17-K3-O15  | 112.08(16) |
| O17-K3-O18  | 58.30(15)  |
| O17-K3-O6B  | 68.77(15)  |
| O18-K3-O12B | 142.13(14) |
| O6B-K3-O12B | 60.58(16)  |
| O6B-K3-O18  | 84.97(16)  |
| C17-O7-K2   | 115.7(3)   |
| C17-O7-C18  | 117.5(5)   |
| C18-O7-K2   | 118.0(3)   |
| C19-O8-K2   | 107.1(4)   |
| C19-O8-C20  | 112.5(5)   |
| C20-O8-K2   | 106.8(4)   |
| K1-O9-K2    | 89.62(13)  |
| C21-O9-K2   | 110.5(3)   |
| C21-O9-K1   | 110.8(3)   |
| C22-O9-K2   | 108.3(4)   |
| C22-O9-K1   | 121.6(4)   |
| C22-O9-C21  | 113.2(5)   |

|               |          |
|---------------|----------|
| C23-O10-K2    | 118.3(4) |
| C23-O10-C24   | 113.3(5) |
| C24-O10-K2    | 115.2(4) |
| C25-O11-K2    | 111.9(4) |
| C26-O11-K2    | 110.8(3) |
| C26-O11-C25   | 112.9(5) |
| C27-O12-K2    | 117.9(4) |
| C28-O12-K2    | 114.0(4) |
| C28-O12-C27   | 117.5(5) |
| O7-C17-C28    | 114.2(6) |
| O7-C17-C32    | 125.1(6) |
| C32-C17-C28   | 120.6(6) |
| O7-C18-H18A   | 110.4    |
| O7-C18-H18B   | 110.4    |
| O7-C18-C19    | 106.6(5) |
| H18A-C18-H18B | 108.6    |
| C19-C18-H18A  | 110.4    |
| C19-C18-H18B  | 110.4    |
| K2-C19-H19A   | 78.0     |
| K2-C19-H19B   | 158.8    |
| O8-C19-K2     | 49.6(3)  |
| O8-C19-C18    | 107.2(5) |
| O8-C19-H19A   | 110.3    |
| O8-C19-H19B   | 110.3    |
| C18-C19-K2    | 85.0(4)  |
| C18-C19-H19A  | 110.3    |
| C18-C19-H19B  | 110.3    |
| H19A-C19-H19B | 108.5    |
| K2-C20-H20A   | 158.4    |
| K2-C20-H20B   | 77.5     |
| O8-C20-K2     | 49.7(3)  |
| O8-C20-H20A   | 109.9    |
| O8-C20-H20B   | 109.9    |
| O8-C20-C21    | 108.9(5) |
| H20A-C20-H20B | 108.3    |
| C21-C20-K2    | 86.5(4)  |

|               |          |
|---------------|----------|
| C21-C20-H20A  | 109.9    |
| C21-C20-H20B  | 109.9    |
| O9-C21-C20    | 112.6(5) |
| O9-C21-H21A   | 109.1    |
| O9-C21-H21B   | 109.1    |
| C20-C21-H21A  | 109.1    |
| C20-C21-H21B  | 109.1    |
| H21A-C21-H21B | 107.8    |
| O9-C22-H22A   | 110.1    |
| O9-C22-H22B   | 110.1    |
| O9-C22-C23    | 108.1(6) |
| H22A-C22-H22B | 108.4    |
| C23-C22-H22A  | 110.1    |
| C23-C22-H22B  | 110.1    |
| O10-C23-C22   | 109.7(6) |
| O10-C23-H23A  | 109.7    |
| O10-C23-H23B  | 109.7    |
| C22-C23-H23A  | 109.7    |
| C22-C23-H23B  | 109.7    |
| H23A-C23-H23B | 108.2    |
| O10-C24-H24A  | 110.2    |
| O10-C24-H24B  | 110.2    |
| O10-C24-C25   | 107.4(5) |
| H24A-C24-H24B | 108.5    |
| C25-C24-H24A  | 110.2    |
| C25-C24-H24B  | 110.2    |
| O11-C25-C24   | 109.3(5) |
| O11-C25-H25A  | 109.8    |
| O11-C25-H25B  | 109.8    |
| C24-C25-H25A  | 109.8    |
| C24-C25-H25B  | 109.8    |
| H25A-C25-H25B | 108.3    |
| K2-C26-H26A   | 157.1    |
| K2-C26-H26B   | 83.4     |
| O11-C26-K2    | 47.2(3)  |
| O11-C26-H26A  | 110.0    |

|               |          |
|---------------|----------|
| O11-C26-H26B  | 110.0    |
| O11-C26-C27   | 108.5(5) |
| H26A-C26-H26B | 108.4    |
| C27-C26-K2    | 82.8(4)  |
| C27-C26-H26A  | 110.0    |
| C27-C26-H26B  | 110.0    |
| O12-C27-C26   | 106.7(5) |
| O12-C27-H27A  | 110.4    |
| O12-C27-H27B  | 110.4    |
| C26-C27-H27A  | 110.4    |
| C26-C27-H27B  | 110.4    |
| H27A-C27-H27B | 108.6    |
| O12-C28-C17   | 115.4(6) |
| O12-C28-C29   | 124.2(6) |
| C29-C28-C17   | 120.3(6) |
| C28-C29-H29   | 120.7    |
| C30-C29-C28   | 118.5(7) |
| C30-C29-H29   | 120.7    |
| C29-C30-H30   | 119.4    |
| C31-C30-C29   | 121.1(7) |
| C31-C30-H30   | 119.4    |
| C30-C31-H31   | 119.9    |
| C30-C31-C32   | 120.1(6) |
| C32-C31-H31   | 119.9    |
| C17-C32-C31   | 119.2(6) |
| C17-C32-H32   | 120.4    |
| C31-C32-H32   | 120.4    |
| C1-O1-K1      | 118.2(4) |
| C1-O1-C2      | 116.5(6) |
| C2-O1-K1      | 117.8(4) |
| O1-C1-C12     | 113.6(6) |
| C16-C1-O1     | 125.4(7) |
| C16-C1-C12    | 120.9(7) |
| C3-O2-K1      | 112.4(4) |
| C4-O2-K1      | 111.6(4) |
| C4-O2-C3      | 111.4(5) |

|            |           |
|------------|-----------|
| O1-C2-H2A  | 110.3     |
| O1-C2-H2B  | 110.3     |
| O1-C2-C3   | 107.1(6)  |
| H2A-C2-H2B | 108.6     |
| C3-C2-H2A  | 110.3     |
| C3-C2-H2B  | 110.3     |
| C5-O3-K1   | 116.5(4)  |
| C6-O3-K1   | 119.7(4)  |
| C6-O3-C5   | 112.8(5)  |
| O2-C3-C2   | 109.5(6)  |
| O2-C3-H3A  | 109.8     |
| O2-C3-H3B  | 109.8     |
| C2-C3-H3A  | 109.8     |
| C2-C3-H3B  | 109.8     |
| H3A-C3-H3B | 108.2     |
| K2-O4-K1   | 88.28(13) |
| C7-O4-K2   | 127.9(4)  |
| C7-O4-K1   | 106.9(4)  |
| C8-O4-K2   | 106.9(4)  |
| C8-O4-K1   | 110.4(4)  |
| C8-O4-C7   | 113.1(5)  |
| K1-C4-H4A  | 155.3     |
| K1-C4-H4B  | 89.4      |
| O2-C4-K1   | 46.2(3)   |
| O2-C4-H4A  | 109.9     |
| O2-C4-H4B  | 109.9     |
| O2-C4-C5   | 108.9(5)  |
| H4A-C4-H4B | 108.3     |
| C5-C4-K1   | 78.5(4)   |
| C5-C4-H4A  | 109.9     |
| C5-C4-H4B  | 109.9     |
| C9-O5-K1   | 107.6(4)  |
| C10-O5-K1  | 106.7(4)  |
| C10-O5-C9  | 112.4(5)  |
| O3-C5-C4   | 108.7(6)  |
| O3-C5-H5A  | 109.9     |

|            |          |
|------------|----------|
| O3-C5-H5B  | 109.9    |
| C4-C5-H5A  | 109.9    |
| C4-C5-H5B  | 109.9    |
| H5A-C5-H5B | 108.3    |
| C11-O6-K1  | 117.0(4) |
| C12-O6-K1  | 117.5(4) |
| C12-O6-C11 | 118.5(5) |
| O3-C6-H6A  | 109.7    |
| O3-C6-H6B  | 109.7    |
| O3-C6-C7   | 109.9(6) |
| H6A-C6-H6B | 108.2    |
| C7-C6-H6A  | 109.7    |
| C7-C6-H6B  | 109.7    |
| O4-C7-C6   | 109.1(5) |
| O4-C7-H7A  | 109.9    |
| O4-C7-H7B  | 109.9    |
| C6-C7-H7A  | 109.9    |
| C6-C7-H7B  | 109.9    |
| H7A-C7-H7B | 108.3    |
| K2-C8-H8A  | 59.1     |
| K2-C8-H8B  | 120.1    |
| O4-C8-K2   | 49.9(3)  |
| O4-C8-H8A  | 108.9    |
| O4-C8-H8B  | 108.9    |
| O4-C8-C9   | 113.3(6) |
| H8A-C8-H8B | 107.7    |
| C9-C8-K2   | 130.9(4) |
| C9-C8-H8A  | 108.9    |
| C9-C8-H8B  | 108.9    |
| K1-C9-H9A  | 77.7     |
| K1-C9-H9B  | 158.4    |
| O5-C9-K1   | 49.3(3)  |
| O5-C9-C8   | 107.2(5) |
| O5-C9-H9A  | 110.3    |
| O5-C9-H9B  | 110.3    |
| C8-C9-K1   | 85.6(4)  |

|               |          |
|---------------|----------|
| C8-C9-H9A     | 110.3    |
| C8-C9-H9B     | 110.3    |
| H9A-C9-H9B    | 108.5    |
| K1-C10-H10A   | 159.4    |
| K1-C10-H10B   | 79.0     |
| O5-C10-K1     | 50.0(3)  |
| O5-C10-H10A   | 110.0    |
| O5-C10-H10B   | 110.0    |
| O5-C10-C11    | 108.5(5) |
| H10A-C10-H10B | 108.4    |
| C11-C10-K1    | 84.2(4)  |
| C11-C10-H10A  | 110.0    |
| C11-C10-H10B  | 110.0    |
| O6-C11-C10    | 108.3(5) |
| O6-C11-H11A   | 110.0    |
| O6-C11-H11B   | 110.0    |
| C10-C11-H11A  | 110.0    |
| C10-C11-H11B  | 110.0    |
| H11A-C11-H11B | 108.4    |
| O6-C12-C1     | 116.5(6) |
| O6-C12-C13    | 123.7(6) |
| C13-C12-C1    | 119.8(7) |
| C12-C13-H13   | 120.6    |
| C12-C13-C14   | 118.8(7) |
| C14-C13-H13   | 120.6    |
| C13-C14-H14   | 119.5    |
| C15-C14-C13   | 120.9(8) |
| C15-C14-H14   | 119.5    |
| C14-C15-H15   | 120.2    |
| C14-C15-C16   | 119.6(8) |
| C16-C15-H15   | 120.2    |
| C1-C16-C15    | 119.9(8) |
| C1-C16-H16    | 120.0    |
| C15-C16-H16   | 120.0    |
| C3B-O3B-K2    | 135.4(5) |
| C9B-O9B-K3    | 142.6(5) |

|               |          |
|---------------|----------|
| C12B-O12B-K3  | 135.2(5) |
| C33-O13-K3    | 123.1(5) |
| C33-O13-C34   | 117.9(6) |
| C34-O13-K3    | 110.5(4) |
| C35-O14-K3    | 117.2(4) |
| C36-O14-K3    | 115.5(4) |
| C36-O14-C35   | 111.4(5) |
| C37-O15-K3    | 111.5(4) |
| C37-O15-C38   | 112.7(6) |
| C38-O15-K3    | 112.0(4) |
| C39-O16-K3    | 118.1(4) |
| C40-O16-K3    | 118.0(4) |
| C40-O16-C39   | 112.1(6) |
| C41-O17-K3    | 109.7(4) |
| C42-O17-K3    | 110.0(4) |
| C42-O17-C41   | 112.3(6) |
| C43-O18-K3    | 115.1(4) |
| C44-O18-K3    | 119.1(4) |
| C44-O18-C43   | 116.6(6) |
| C44-C33-O13   | 112.5(7) |
| C44-C33-C48   | 121.3(8) |
| C48-C33-O13   | 126.2(8) |
| O13-C34-H34A  | 109.9    |
| O13-C34-H34B  | 109.9    |
| O13-C34-C35   | 109.0(7) |
| H34A-C34-H34B | 108.3    |
| C35-C34-H34A  | 109.9    |
| C35-C34-H34B  | 109.9    |
| O14-C35-C34   | 108.1(6) |
| O14-C35-H35A  | 110.1    |
| O14-C35-H35B  | 110.1    |
| C34-C35-H35A  | 110.1    |
| C34-C35-H35B  | 110.1    |
| H35A-C35-H35B | 108.4    |
| O14-C36-H36A  | 110.0    |
| O14-C36-H36B  | 110.0    |

|               |          |
|---------------|----------|
| O14-C36-C37   | 108.3(6) |
| H36A-C36-H36B | 108.4    |
| C37-C36-H36A  | 110.0    |
| C37-C36-H36B  | 110.0    |
| O15-C37-C36   | 109.4(6) |
| O15-C37-H37A  | 109.8    |
| O15-C37-H37B  | 109.8    |
| C36-C37-H37A  | 109.8    |
| C36-C37-H37B  | 109.8    |
| H37A-C37-H37B | 108.2    |
| O15-C38-H38A  | 109.9    |
| O15-C38-H38B  | 109.9    |
| O15-C38-C39   | 109.0(7) |
| H38A-C38-H38B | 108.3    |
| C39-C38-H38A  | 109.9    |
| C39-C38-H38B  | 109.9    |
| O16-C39-C38   | 108.5(6) |
| O16-C39-H39A  | 110.0    |
| O16-C39-H39B  | 110.0    |
| C38-C39-H39A  | 110.0    |
| C38-C39-H39B  | 110.0    |
| H39A-C39-H39B | 108.4    |
| O16-C40-H40A  | 109.7    |
| O16-C40-H40B  | 109.7    |
| O16-C40-C41   | 109.6(6) |
| H40A-C40-H40B | 108.2    |
| C41-C40-H40A  | 109.7    |
| C41-C40-H40B  | 109.7    |
| O17-C41-C40   | 108.3(6) |
| O17-C41-H41A  | 110.0    |
| O17-C41-H41B  | 110.0    |
| C40-C41-H41A  | 110.0    |
| C40-C41-H41B  | 110.0    |
| H41A-C41-H41B | 108.4    |
| O17-C42-H42A  | 109.9    |
| O17-C42-H42B  | 109.9    |

|               |          |
|---------------|----------|
| O17-C42-C43   | 108.9(6) |
| H42A-C42-H42B | 108.3    |
| C43-C42-H42A  | 109.9    |
| C43-C42-H42B  | 109.9    |
| O18-C43-C42   | 109.1(6) |
| O18-C43-H43A  | 109.9    |
| O18-C43-H43B  | 109.9    |
| C42-C43-H43A  | 109.9    |
| C42-C43-H43B  | 109.9    |
| H43A-C43-H43B | 108.3    |
| O18-C44-C45   | 123.1(8) |
| C33-C44-O18   | 117.7(7) |
| C33-C44-C45   | 119.3(8) |
| C44-C45-H45   | 120.7    |
| C46-C45-C44   | 118.7(9) |
| C46-C45-H45   | 120.7    |
| C45-C46-H46   | 119.2    |
| C47-C46-C45   | 121.5(9) |
| C47-C46-H46   | 119.2    |
| C46-C47-H47   | 120.0    |
| C46-C47-C48   | 120.0(9) |
| C48-C47-H47   | 120.0    |
| C33-C48-C47   | 119.2(9) |
| C33-C48-H48   | 120.4    |
| C47-C48-H48   | 120.4    |
| C6B-O6B-K3    | 130.0(6) |
| O3B-C3B-Fe1B  | 178.2(7) |
| O2B-C2B-Fe1B  | 178.2(6) |
| O1B-C1B-Fe1B  | 178.7(7) |
| Fe1B-C0B-Fe3B | 88.8(3)  |
| Fe1B-C0B-Fe2B | 177.5(4) |
| Fe1B-C0B-Fe4B | 88.8(3)  |
| Fe3B-C0B-Fe4B | 80.3(3)  |
| Fe2B-C0B-Fe3B | 89.5(3)  |
| Fe2B-C0B-Fe4B | 89.1(3)  |
| O7B-C7B-Fe3B  | 175.7(7) |

|                |           |
|----------------|-----------|
| O8B-C8B-Fe3B   | 176.9(6)  |
| O9B-C9B-Fe3B   | 176.6(7)  |
| O11B-C11B-Fe4B | 174.1(7)  |
| O5B-C5B-Fe2B   | 177.0(8)  |
| O12B-C12B-Fe4B | 175.8(7)  |
| O10B-C10B-Fe4B | 176.6(8)  |
| O6B-C6B-Fe2B   | 177.5(8)  |
| O4B-C4B-Fe2B   | 174.9(8)  |
| Fe3A-Fe1A-Fe4A | 58.17(9)  |
| C1A-Fe1A-Fe3A  | 95.4(10)  |
| C1A-Fe1A-Fe4A  | 147.8(10) |
| C1A-Fe1A-C2A   | 103.7(17) |
| C1A-Fe1A-C3A   | 99.0(12)  |
| C2A-Fe1A-Fe3A  | 106.5(9)  |
| C2A-Fe1A-Fe4A  | 101.7(14) |
| C3A-Fe1A-Fe3A  | 146.4(7)  |
| C3A-Fe1A-Fe4A  | 96.1(7)   |
| C3A-Fe1A-C2A   | 99.3(12)  |
| C0A-Fe1A-Fe3A  | 49.4(4)   |
| C0A-Fe1A-Fe4A  | 47.6(4)   |
| C0A-Fe1A-C1A   | 102.0(10) |
| C0A-Fe1A-C2A   | 146.4(12) |
| C0A-Fe1A-C3A   | 97.8(8)   |
| Fe1A-Fe3A-Fe2A | 83.25(10) |
| Fe4A-Fe3A-Fe1A | 61.80(9)  |
| Fe4A-Fe3A-Fe2A | 59.93(9)  |
| C0A-Fe3A-Fe1A  | 41.5(3)   |
| C0A-Fe3A-Fe2A  | 41.8(3)   |
| C0A-Fe3A-Fe4A  | 49.2(3)   |
| C8A-Fe3A-Fe1A  | 80.5(5)   |
| C8A-Fe3A-Fe2A  | 159.4(5)  |
| C8A-Fe3A-Fe4A  | 100.9(5)  |
| C8A-Fe3A-C0A   | 120.8(6)  |
| C7A-Fe3A-Fe1A  | 103.0(8)  |
| C7A-Fe3A-Fe2A  | 99.6(8)   |
| C7A-Fe3A-Fe4A  | 154.3(9)  |

|                |           |
|----------------|-----------|
| C7A-Fe3A-C0A   | 105.3(10) |
| C7A-Fe3A-C8A   | 96.3(10)  |
| C9A-Fe3A-Fe1A  | 153.6(6)  |
| C9A-Fe3A-Fe2A  | 87.1(5)   |
| C9A-Fe3A-Fe4A  | 92.2(5)   |
| C9A-Fe3A-C0A   | 124.5(6)  |
| C9A-Fe3A-C8A   | 102.1(7)  |
| C9A-Fe3A-C7A   | 102.8(10) |
| Fe4A-Fe2A-Fe3A | 58.32(9)  |
| C0A-Fe2A-Fe3A  | 48.4(4)   |
| C0A-Fe2A-Fe4A  | 48.9(4)   |
| C0A-Fe2A-C4A   | 104.2(8)  |
| C5A-Fe2A-Fe3A  | 101.3(13) |
| C5A-Fe2A-Fe4A  | 108.9(17) |
| C5A-Fe2A-C0A   | 147.4(15) |
| C5A-Fe2A-C4A   | 98.8(15)  |
| C4A-Fe2A-Fe3A  | 147.1(7)  |
| C4A-Fe2A-Fe4A  | 90.5(7)   |
| C6A-Fe2A-Fe3A  | 95.3(10)  |
| C6A-Fe2A-Fe4A  | 139.9(11) |
| C6A-Fe2A-C0A   | 91.0(11)  |
| C6A-Fe2A-C5A   | 105(2)    |
| C6A-Fe2A-C4A   | 104.2(12) |
| Fe3A-Fe4A-Fe1A | 60.02(9)  |
| Fe3A-Fe4A-Fe2A | 61.75(9)  |
| Fe2A-Fe4A-Fe1A | 83.27(10) |
| C0A-Fe4A-Fe1A  | 40.6(3)   |
| C0A-Fe4A-Fe3A  | 49.8(3)   |
| C0A-Fe4A-Fe2A  | 42.7(3)   |
| C12A-Fe4A-Fe1A | 89.9(5)   |
| C12A-Fe4A-Fe3A | 92.2(6)   |
| C12A-Fe4A-Fe2A | 153.0(6)  |
| C12A-Fe4A-C0A  | 125.9(6)  |
| C12A-Fe4A-C11A | 95.6(7)   |
| C12A-Fe4A-C10A | 102.9(10) |
| C11A-Fe4A-Fe1A | 162.2(6)  |

|                |           |
|----------------|-----------|
| C11A-Fe4A-Fe3A | 102.7(5)  |
| C11A-Fe4A-Fe2A | 84.2(5)   |
| C11A-Fe4A-C0A  | 125.8(6)  |
| C10A-Fe4A-Fe1A | 94.4(8)   |
| C10A-Fe4A-Fe3A | 150.5(7)  |
| C10A-Fe4A-Fe2A | 103.7(9)  |
| C10A-Fe4A-C0A  | 101.5(8)  |
| C10A-Fe4A-C11A | 100.8(9)  |
| C3A-O3A-K1     | 135(2)    |
| O1A-C1A-Fe1A   | 175(3)    |
| O2A-C2A-Fe1A   | 176(4)    |
| Fe1A-C3A-K1    | 146.4(10) |
| O3A-C3A-K1     | 32.5(17)  |
| O3A-C3A-Fe1A   | 179(2)    |
| Fe1A-C0A-Fe3A  | 89.2(5)   |
| Fe1A-C0A-Fe2A  | 179.0(8)  |
| Fe1A-C0A-Fe4A  | 91.8(5)   |
| Fe2A-C0A-Fe3A  | 89.8(5)   |
| Fe2A-C0A-Fe4A  | 88.4(5)   |
| Fe4A-C0A-Fe3A  | 80.9(5)   |
| O8A-C8A-Fe3A   | 172.4(17) |
| O7A-C7A-Fe3A   | 178(2)    |
| O9A-C9A-Fe3A   | 170(2)    |
| O12A-C12A-Fe4A | 177.3(16) |
| O11A-C11A-Fe4A | 175.5(17) |
| O10A-C10A-Fe4A | 174.8(19) |
| O5A-C5A-Fe2A   | 177(4)    |
| O4A-C4A-Fe2A   | 170(3)    |
| O6A-C6A-Fe2A   | 174(3)    |
| F1D-C1D-C2D    | 119.6(6)  |
| F1D-C1D-C6D    | 120.3(6)  |
| C2D-C1D-C6D    | 120.0     |
| C1D-C2D-H2D    | 120.0     |
| C3D-C2D-C1D    | 120.0     |
| C3D-C2D-H2D    | 120.0     |
| C2D-C3D-H3D    | 120.0     |

|                |          |
|----------------|----------|
| C2D-C3D-C4D    | 120.0    |
| C4D-C3D-H3D    | 120.0    |
| C3D-C4D-H4D    | 120.0    |
| C5D-C4D-C3D    | 120.0    |
| C5D-C4D-H4D    | 120.0    |
| C4D-C5D-H5D    | 120.0    |
| C4D-C5D-C6D    | 120.0    |
| C6D-C5D-H5D    | 120.0    |
| C1D-C6D-H6D    | 120.0    |
| C5D-C6D-C1D    | 120.0    |
| C5D-C6D-H6D    | 120.0    |
| F1DA-C1DA-C6DA | 111(2)   |
| F1DA-C1DA-C2DA | 129(2)   |
| C6DA-C1DA-C2DA | 120.0    |
| C1DA-C6DA-H6DA | 120.0    |
| C5DA-C6DA-C1DA | 120.0    |
| C5DA-C6DA-H6DA | 120.0    |
| C6DA-C5DA-H5DA | 120.0    |
| C6DA-C5DA-C4DA | 120.0    |
| C4DA-C5DA-H5DA | 120.0    |
| C5DA-C4DA-H4DA | 120.0    |
| C3DA-C4DA-C5DA | 120.0    |
| C3DA-C4DA-H4DA | 120.0    |
| C4DA-C3DA-H3DA | 120.0    |
| C4DA-C3DA-C2DA | 120.0    |
| C2DA-C3DA-H3DA | 120.0    |
| C1DA-C2DA-H2DA | 120.0    |
| C3DA-C2DA-C1DA | 120.0    |
| C3DA-C2DA-H2DA | 120.0    |
| F1E-C1E-C2E    | 119.9(6) |
| F1E-C1E-C6E    | 120.1(6) |
| C2E-C1E-C6E    | 120.0    |
| C1E-C2E-H2E    | 120.0    |
| C1E-C2E-C3E    | 120.0    |
| C3E-C2E-H2E    | 120.0    |
| C2E-C3E-H3E    | 120.0    |

|                |          |
|----------------|----------|
| C2E-C3E-C4E    | 120.0    |
| C4E-C3E-H3E    | 120.0    |
| C3E-C4E-H4E    | 120.0    |
| C5E-C4E-C3E    | 120.0    |
| C5E-C4E-H4E    | 120.0    |
| C4E-C5E-H5E    | 120.0    |
| C4E-C5E-C6E    | 120.0    |
| C6E-C5E-H5E    | 120.0    |
| C1E-C6E-H6E    | 120.0    |
| C5E-C6E-C1E    | 120.0    |
| C5E-C6E-H6E    | 120.0    |
| F1EA-C1EA-C6EA | 118(2)   |
| F1EA-C1EA-C2EA | 122(2)   |
| C6EA-C1EA-C2EA | 120.0    |
| C1EA-C6EA-H6EA | 120.0    |
| C5EA-C6EA-C1EA | 120.0    |
| C5EA-C6EA-H6EA | 120.0    |
| C6EA-C5EA-H5EA | 120.0    |
| C6EA-C5EA-C4EA | 120.0    |
| C4EA-C5EA-H5EA | 120.0    |
| C5EA-C4EA-H4EA | 120.0    |
| C3EA-C4EA-C5EA | 120.0    |
| C3EA-C4EA-H4EA | 120.0    |
| C4EA-C3EA-H3EA | 120.0    |
| C2EA-C3EA-C4EA | 120.0    |
| C2EA-C3EA-H3EA | 120.0    |
| C1EA-C2EA-H2EA | 120.0    |
| C3EA-C2EA-C1EA | 120.0    |
| C3EA-C2EA-H2EA | 120.0    |
| F1F-C1F-C2F    | 120.3(6) |
| F1F-C1F-C6F    | 119.5(6) |
| C2F-C1F-C6F    | 120.0    |
| C1F-C2F-H2F    | 120.0    |
| C3F-C2F-C1F    | 120.0    |
| C3F-C2F-H2F    | 120.0    |
| C2F-C3F-H3F    | 120.0    |

|                |           |
|----------------|-----------|
| C2F-C3F-C4F    | 120.0     |
| C4F-C3F-H3F    | 120.0     |
| C3F-C4F-H4F    | 120.0     |
| C3F-C4F-C5F    | 120.0     |
| C5F-C4F-H4F    | 120.0     |
| C4F-C5F-H5F    | 120.0     |
| C4F-C5F-C6F    | 120.0     |
| C6F-C5F-H5F    | 120.0     |
| C1F-C6F-H6F    | 120.0     |
| C5F-C6F-C1F    | 120.0     |
| C5F-C6F-H6F    | 120.0     |
| F1FA-C1FA-C2FA | 122.3(14) |
| F1FA-C1FA-C6FA | 116.7(14) |
| C2FA-C1FA-C6FA | 120.0     |
| C1FA-C2FA-H2FA | 120.0     |
| C3FA-C2FA-C1FA | 120.0     |
| C3FA-C2FA-H2FA | 120.0     |
| C2FA-C3FA-H3FA | 120.0     |
| C2FA-C3FA-C4FA | 120.0     |
| C4FA-C3FA-H3FA | 120.0     |
| C3FA-C4FA-H4FA | 120.0     |
| C5FA-C4FA-C3FA | 120.0     |
| C5FA-C4FA-H4FA | 120.0     |
| C4FA-C5FA-H5FA | 120.0     |
| C6FA-C5FA-C4FA | 120.0     |
| C6FA-C5FA-H5FA | 120.0     |
| C1FA-C6FA-H6FA | 120.0     |
| C5FA-C6FA-C1FA | 120.0     |
| C5FA-C6FA-H6FA | 120.0     |

---

**Table S4.** Anisotropic displacement parameters ( $\text{\AA}^2 \times 10^3$ ) for **1**. The anisotropic displacement factor exponent takes the form:  $-2p^2[ h^2 a^* U^{11} + \dots + 2 h k a^* b^* U^{12} ]$

|      | U11   | U22   | U33   | U23   | U13   | U12   |
|------|-------|-------|-------|-------|-------|-------|
| Fe1B | 37(1) | 40(1) | 38(1) | 18(1) | 12(1) | 9(1)  |
| Fe3B | 44(1) | 36(1) | 41(1) | 18(1) | 13(1) | 7(1)  |
| Fe2B | 60(1) | 39(1) | 42(1) | 15(1) | 13(1) | 10(1) |
| Fe4B | 52(1) | 38(1) | 45(1) | 18(1) | 21(1) | 11(1) |
| K2   | 28(1) | 40(1) | 32(1) | 15(1) | 7(1)  | 6(1)  |
| K1   | 30(1) | 54(1) | 34(1) | 23(1) | 7(1)  | -1(1) |
| K3   | 48(1) | 42(1) | 34(1) | 13(1) | 6(1)  | 8(1)  |
| O7   | 27(2) | 30(2) | 39(3) | 12(2) | 14(2) | 5(2)  |
| O8   | 39(3) | 35(2) | 43(3) | 18(2) | 16(2) | 14(2) |
| O9   | 34(2) | 43(3) | 35(3) | 18(2) | 10(2) | 7(2)  |
| O10  | 35(2) | 49(3) | 33(3) | 20(2) | 12(2) | 8(2)  |
| O11  | 33(2) | 43(3) | 35(3) | 17(2) | 9(2)  | 5(2)  |
| O12  | 28(2) | 35(2) | 40(3) | 16(2) | 9(2)  | 2(2)  |
| C17  | 40(4) | 33(3) | 21(3) | 12(3) | 4(3)  | 3(3)  |
| C18  | 36(3) | 33(3) | 38(4) | 16(3) | 14(3) | 5(3)  |
| C19  | 43(4) | 41(4) | 36(4) | 19(3) | 15(3) | 10(3) |
| C20  | 43(4) | 35(3) | 35(4) | 15(3) | 13(3) | 10(3) |
| C21  | 36(3) | 36(3) | 33(4) | 9(3)  | 6(3)  | 5(3)  |
| C22  | 39(4) | 47(4) | 39(4) | 10(3) | 11(3) | 12(3) |
| C23  | 37(4) | 59(4) | 33(4) | 15(3) | 11(3) | 9(3)  |
| C24  | 43(4) | 51(4) | 49(5) | 26(4) | 15(3) | 4(3)  |
| C25  | 34(4) | 51(4) | 49(5) | 21(3) | 10(3) | 2(3)  |
| C26  | 36(4) | 53(4) | 36(4) | 17(3) | 3(3)  | -5(3) |
| C27  | 35(4) | 42(4) | 36(4) | 13(3) | 7(3)  | -2(3) |
| C28  | 31(3) | 37(3) | 33(4) | 14(3) | 9(3)  | 8(3)  |
| C29  | 46(4) | 41(4) | 40(4) | 18(3) | 8(3)  | 7(3)  |
| C30  | 43(4) | 40(4) | 51(5) | 16(3) | 10(3) | 14(3) |
| C31  | 40(4) | 49(4) | 36(4) | 15(3) | 14(3) | 13(3) |
| C32  | 30(3) | 40(4) | 44(4) | 19(3) | 13(3) | 9(3)  |
| O1   | 40(3) | 47(3) | 37(3) | 18(2) | 8(2)  | -6(2) |
| C1   | 42(4) | 58(4) | 31(4) | 19(3) | 7(3)  | 3(3)  |

|      |       |       |       |       |       |        |
|------|-------|-------|-------|-------|-------|--------|
| O2   | 28(2) | 63(3) | 51(3) | 33(3) | 5(2)  | -3(2)  |
| C2   | 50(4) | 45(4) | 46(5) | 15(3) | 7(3)  | -11(3) |
| O3   | 31(2) | 66(3) | 50(3) | 33(3) | 13(2) | 6(2)   |
| C3   | 51(4) | 55(4) | 56(5) | 31(4) | 4(4)  | -3(3)  |
| O4   | 34(2) | 46(3) | 41(3) | 25(2) | 11(2) | 10(2)  |
| C4   | 28(4) | 71(5) | 57(5) | 34(4) | 0(3)  | -9(3)  |
| O5   | 42(3) | 48(3) | 43(3) | 28(2) | 12(2) | 5(2)   |
| C5   | 35(4) | 63(5) | 61(5) | 40(4) | 12(3) | 4(3)   |
| O6   | 36(2) | 44(3) | 35(3) | 17(2) | 10(2) | -5(2)  |
| C6   | 37(4) | 70(5) | 52(5) | 35(4) | 16(3) | 20(3)  |
| C7   | 43(4) | 59(4) | 46(4) | 30(4) | 18(3) | 24(3)  |
| C8   | 53(4) | 43(4) | 34(4) | 17(3) | 12(3) | 10(3)  |
| C9   | 50(4) | 46(4) | 46(4) | 25(3) | 15(3) | 11(3)  |
| C10  | 43(4) | 49(4) | 49(5) | 27(4) | 11(3) | -2(3)  |
| C11  | 45(4) | 48(4) | 38(4) | 21(3) | 10(3) | -11(3) |
| C12  | 32(3) | 54(4) | 22(4) | 12(3) | 1(3)  | -2(3)  |
| C13  | 44(4) | 57(4) | 32(4) | 9(3)  | 2(3)  | 1(3)   |
| C14  | 37(4) | 71(5) | 49(5) | 11(4) | 6(3)  | 9(4)   |
| C15  | 72(5) | 68(5) | 54(5) | 9(4)  | 12(4) | 19(4)  |
| C16  | 53(5) | 53(5) | 55(5) | 11(4) | 8(4)  | 1(4)   |
| O3B  | 41(3) | 54(3) | 50(3) | 30(3) | 13(2) | 14(2)  |
| O2B  | 43(3) | 46(3) | 48(3) | 15(3) | 12(2) | 8(2)   |
| O11B | 52(3) | 58(3) | 58(4) | 33(3) | 17(3) | 17(3)  |
| O9B  | 67(3) | 46(3) | 66(4) | 33(3) | 17(3) | 10(3)  |
| O7B  | 54(3) | 53(3) | 44(3) | 17(3) | 10(3) | 9(3)   |
| O1B  | 43(3) | 75(4) | 75(4) | 48(3) | 25(3) | 18(3)  |
| O12B | 65(3) | 46(3) | 62(4) | 22(3) | 20(3) | 18(3)  |
| O13  | 69(4) | 63(4) | 43(3) | 16(3) | 16(3) | -11(3) |
| O14  | 57(3) | 63(3) | 38(3) | 25(3) | 5(2)  | 10(3)  |
| O15  | 55(3) | 49(3) | 54(3) | 24(3) | 10(3) | 6(2)   |
| O16  | 61(3) | 50(3) | 49(3) | 20(3) | 17(3) | 10(3)  |
| O17  | 61(3) | 48(3) | 42(3) | 20(2) | 13(3) | 14(2)  |
| O18  | 52(3) | 43(3) | 42(3) | 15(2) | 10(2) | -2(2)  |
| C33  | 53(4) | 61(5) | 56(5) | 25(4) | 18(4) | 2(4)   |
| C34  | 75(5) | 61(5) | 53(5) | 19(4) | 23(4) | -1(4)  |
| C35  | 62(5) | 69(5) | 54(5) | 31(4) | 12(4) | 15(4)  |

|      |        |        |        |       |        |       |
|------|--------|--------|--------|-------|--------|-------|
| C36  | 57(5)  | 58(5)  | 46(5)  | 27(4) | 0(4)   | 3(4)  |
| C37  | 57(5)  | 57(5)  | 54(5)  | 27(4) | 1(4)   | -1(4) |
| C38  | 56(5)  | 57(5)  | 63(5)  | 30(4) | 22(4)  | 12(4) |
| C39  | 54(5)  | 69(5)  | 65(5)  | 30(4) | 20(4)  | 17(4) |
| C40  | 79(5)  | 51(4)  | 42(5)  | 12(4) | 20(4)  | 18(4) |
| C41  | 76(5)  | 52(4)  | 38(4)  | 14(3) | 16(4)  | 19(4) |
| C42  | 69(5)  | 52(4)  | 41(5)  | 23(4) | -7(4)  | -3(4) |
| C43  | 51(4)  | 55(5)  | 46(5)  | 19(4) | -10(4) | -6(4) |
| C44  | 46(4)  | 56(5)  | 56(5)  | 28(4) | 12(4)  | 6(3)  |
| C45  | 55(5)  | 59(5)  | 70(6)  | 27(4) | 13(4)  | -3(4) |
| C46  | 70(5)  | 64(5)  | 100(7) | 40(5) | 42(5)  | 7(4)  |
| C47  | 90(6)  | 82(6)  | 84(6)  | 46(5) | 44(5)  | 11(5) |
| C48  | 81(6)  | 75(6)  | 68(6)  | 31(5) | 35(5)  | 8(4)  |
| O10B | 70(4)  | 83(4)  | 51(4)  | 27(3) | 30(3)  | 14(3) |
| O8B  | 54(3)  | 67(4)  | 64(4)  | 38(3) | 13(3)  | 17(3) |
| O5B  | 62(4)  | 49(3)  | 76(4)  | 16(3) | 8(3)   | 9(3)  |
| O6B  | 97(4)  | 45(3)  | 72(4)  | 21(3) | 0(3)   | 15(3) |
| C3B  | 44(4)  | 44(4)  | 35(4)  | 18(3) | 11(3)  | 8(3)  |
| C2B  | 36(4)  | 40(4)  | 42(4)  | 19(3) | 19(3)  | 14(3) |
| O4B  | 124(6) | 129(7) | 71(5)  | 58(5) | 47(4)  | 46(5) |
| C1B  | 41(4)  | 44(4)  | 45(4)  | 21(3) | 23(3)  | 12(3) |
| C0B  | 44(4)  | 36(3)  | 32(4)  | 12(3) | 2(3)   | 3(3)  |
| C7B  | 48(4)  | 38(4)  | 43(4)  | 17(3) | 18(3)  | 11(3) |
| C8B  | 40(4)  | 53(4)  | 38(4)  | 26(3) | 7(3)   | 9(3)  |
| C9B  | 55(4)  | 45(4)  | 49(5)  | 25(4) | 11(4)  | 6(3)  |
| C11B | 54(4)  | 38(4)  | 48(5)  | 25(3) | 24(4)  | 12(3) |
| C5B  | 62(5)  | 40(4)  | 52(5)  | 14(3) | 16(4)  | 15(4) |
| C12B | 54(4)  | 41(4)  | 54(5)  | 20(3) | 13(4)  | 11(3) |
| C10B | 56(4)  | 49(4)  | 50(5)  | 21(4) | 23(4)  | 12(3) |
| C6B  | 76(5)  | 45(4)  | 47(5)  | 11(4) | 4(4)   | 16(4) |
| C4B  | 86(6)  | 73(6)  | 64(6)  | 36(5) | 27(5)  | 24(5) |
| Fe1A | 28(1)  | 54(1)  | 39(1)  | 25(1) | 7(1)   | 9(1)  |
| Fe3A | 43(1)  | 32(1)  | 37(1)  | 14(1) | 6(1)   | 2(1)  |
| Fe2A | 40(1)  | 54(2)  | 43(2)  | 22(1) | 14(1)  | 14(1) |
| Fe4A | 38(1)  | 35(1)  | 41(2)  | 13(1) | 2(1)   | 0(1)  |
| O1A  | 38(6)  | 76(9)  | 30(8)  | 33(8) | 8(7)   | 17(6) |

|      |        |         |        |        |        |        |
|------|--------|---------|--------|--------|--------|--------|
| O2A  | 55(6)  | 40(6)   | 54(7)  | 14(5)  | 15(5)  | 18(5)  |
| O12A | 51(9)  | 59(8)   | 50(10) | 23(9)  | -2(9)  | -15(6) |
| O9A  | 89(15) | 60(14)  | 71(14) | 36(11) | 21(11) | 29(11) |
| O8A  | 60(12) | 17(7)   | 19(7)  | 0(5)   | -14(8) | 14(8)  |
| O3A  | 41(7)  | 34(7)   | 39(7)  | 19(6)  | 6(5)   | 12(6)  |
| O11A | 35(10) | 61(9)   | 30(11) | 19(9)  | -3(9)  | -1(6)  |
| O10A | 56(6)  | 41(6)   | 46(6)  | 21(5)  | 17(5)  | -2(5)  |
| O7A  | 55(6)  | 50(6)   | 57(7)  | 15(5)  | 16(6)  | 1(5)   |
| O5A  | 45(6)  | 66(7)   | 54(7)  | 21(6)  | 0(5)   | 8(5)   |
| C1A  | 24(8)  | 46(9)   | 35(10) | 13(7)  | 9(6)   | 6(7)   |
| C2A  | 42(10) | 46(9)   | 48(10) | 14(6)  | 13(8)  | 13(6)  |
| O4A  | 67(11) | 37(11)  | 55(10) | 20(8)  | 23(8)  | 25(7)  |
| C3A  | 44(8)  | 45(8)   | 38(8)  | 20(6)  | 10(7)  | 4(7)   |
| C0A  | 24(5)  | 23(5)   | 32(6)  | 6(4)   | 15(5)  | 4(4)   |
| C8A  | 48(7)  | 30(6)   | 35(7)  | 23(5)  | 5(6)   | 5(6)   |
| C7A  | 39(8)  | 38(8)   | 37(9)  | 11(7)  | 20(8)  | 0(6)   |
| C9A  | 34(6)  | 40(7)   | 36(7)  | 19(6)  | -16(5) | -2(5)  |
| C12A | 47(8)  | 41(7)   | 45(8)  | 24(6)  | 11(6)  | 3(6)   |
| C11A | 36(7)  | 38(7)   | 35(7)  | 22(6)  | 0(5)   | 5(6)   |
| C10A | 59(10) | 46(9)   | 49(11) | 28(8)  | 10(8)  | 4(7)   |
| C5A  | 42(11) | 55(10)  | 38(9)  | 24(7)  | 3(8)   | 7(7)   |
| C4A  | 41(9)  | 52(9)   | 47(9)  | 28(7)  | 3(7)   | 7(7)   |
| C6A  | 59(11) | 72(11)  | 48(12) | 26(8)  | 20(9)  | 15(8)  |
| O6A  | 52(8)  | 89(9)   | 58(10) | 47(8)  | 13(6)  | 5(6)   |
| F1D  | 93(7)  | 114(8)  | 96(7)  | 26(6)  | -24(6) | 3(6)   |
| C1D  | 72(5)  | 76(5)   | 84(6)  | 27(5)  | 27(5)  | 9(5)   |
| C2D  | 78(7)  | 82(7)   | 85(7)  | 30(5)  | 30(6)  | 8(6)   |
| C3D  | 79(6)  | 83(5)   | 84(5)  | 35(4)  | 28(4)  | 11(5)  |
| C4D  | 74(5)  | 76(5)   | 77(5)  | 32(4)  | 25(4)  | 14(4)  |
| C5D  | 74(5)  | 71(5)   | 73(5)  | 28(4)  | 22(4)  | 11(4)  |
| C6D  | 67(6)  | 70(5)   | 76(6)  | 36(5)  | 21(5)  | 5(5)   |
| F1DA | 118(9) | 136(10) | 83(8)  | 39(8)  | 28(7)  | 1(8)   |
| C1DA | 74(5)  | 77(5)   | 78(5)  | 32(4)  | 23(5)  | 14(5)  |
| C6DA | 72(5)  | 70(5)   | 72(5)  | 32(4)  | 22(5)  | 9(5)   |
| C5DA | 55(10) | 61(11)  | 74(12) | 25(8)  | 22(8)  | 14(8)  |
| C4DA | 72(8)  | 77(8)   | 89(8)  | 24(6)  | 23(7)  | 13(7)  |

|      |         |         |         |        |        |       |
|------|---------|---------|---------|--------|--------|-------|
| C3DA | 65(11)  | 61(11)  | 62(11)  | 18(8)  | 30(8)  | 18(8) |
| C2DA | 82(8)   | 88(8)   | 88(8)   | 38(6)  | 29(7)  | 5(7)  |
| F1E  | 72(10)  | 90(10)  | 78(10)  | 39(8)  | 8(8)   | 19(8) |
| C1E  | 55(5)   | 53(5)   | 50(5)   | 24(4)  | 15(5)  | 6(4)  |
| C2E  | 51(6)   | 50(5)   | 51(5)   | 22(4)  | 13(5)  | 10(5) |
| C3E  | 54(6)   | 51(5)   | 54(6)   | 23(4)  | 10(5)  | 10(5) |
| C4E  | 56(6)   | 54(6)   | 56(6)   | 24(5)  | 14(5)  | 8(5)  |
| C5E  | 56(6)   | 51(6)   | 54(6)   | 22(5)  | 16(5)  | 6(5)  |
| C6E  | 57(5)   | 52(5)   | 53(5)   | 22(4)  | 16(5)  | 5(4)  |
| F1EA | 73(9)   | 76(9)   | 70(9)   | 26(8)  | 9(8)   | 8(8)  |
| C1EA | 54(6)   | 52(5)   | 56(6)   | 24(5)  | 13(5)  | 10(5) |
| C6EA | 56(5)   | 53(5)   | 55(5)   | 23(4)  | 14(5)  | 8(4)  |
| C5EA | 56(6)   | 52(5)   | 51(6)   | 21(5)  | 18(5)  | 6(5)  |
| C4EA | 55(6)   | 52(6)   | 49(6)   | 23(5)  | 15(5)  | 4(5)  |
| C3EA | 55(6)   | 52(5)   | 51(6)   | 23(5)  | 14(5)  | 6(5)  |
| C2EA | 52(6)   | 51(5)   | 52(6)   | 23(5)  | 13(5)  | 9(5)  |
| F1F  | 125(9)  | 139(9)  | 150(9)  | 77(8)  | 40(7)  | 44(7) |
| C1F  | 92(5)   | 84(5)   | 87(5)   | 52(4)  | 19(4)  | 16(4) |
| C2F  | 87(5)   | 84(5)   | 85(5)   | 45(4)  | 16(5)  | 13(4) |
| C3F  | 85(5)   | 86(5)   | 86(5)   | 43(4)  | 16(4)  | 10(4) |
| C4F  | 90(5)   | 85(5)   | 86(5)   | 41(4)  | 20(4)  | 8(4)  |
| C5F  | 93(4)   | 81(4)   | 85(4)   | 41(4)  | 20(4)  | 11(4) |
| C6F  | 95(5)   | 80(5)   | 80(5)   | 46(4)  | 17(4)  | 7(4)  |
| F1FA | 158(11) | 132(11) | 183(12) | 33(10) | 23(10) | 8(10) |
| C1FA | 85(5)   | 79(5)   | 83(5)   | 40(4)  | 26(5)  | 11(5) |
| C2FA | 90(5)   | 78(5)   | 82(5)   | 43(4)  | 17(5)  | 11(5) |
| C3FA | 92(5)   | 83(5)   | 81(5)   | 43(4)  | 19(4)  | 8(4)  |
| C4FA | 89(4)   | 83(4)   | 82(4)   | 44(4)  | 19(4)  | 12(4) |
| C5FA | 87(5)   | 89(5)   | 85(5)   | 41(4)  | 17(4)  | 12(4) |
| C6FA | 85(5)   | 83(5)   | 81(5)   | 41(4)  | 22(4)  | 13(4) |

---

**Table S5.** Hydrogen coordinates ( $\times 10^4 \text{ \AA}$ ) and isotropic displacement parameters ( $\text{\AA}^2 \times 10^3$ ) for **1**.

|      | x    | y     | z    | U(eq) |
|------|------|-------|------|-------|
| H18A | 1470 | 8154  | 8345 | 42    |
| H18B | 2039 | 8231  | 9088 | 42    |
| H19A | 3674 | 7661  | 8688 | 46    |
| H19B | 2348 | 7134  | 8320 | 46    |
| H20A | 2996 | 6479  | 7351 | 44    |
| H20B | 4354 | 6970  | 7653 | 44    |
| H21A | 3749 | 6418  | 6458 | 45    |
| H21B | 2676 | 6872  | 6491 | 45    |
| H22A | 5499 | 6906  | 6254 | 53    |
| H22B | 5925 | 7159  | 7052 | 53    |
| H23A | 7170 | 7853  | 6678 | 53    |
| H23B | 5972 | 8141  | 6457 | 53    |
| H24A | 7022 | 9405  | 7335 | 55    |
| H24B | 8173 | 9023  | 7422 | 55    |
| H25A | 8079 | 9323  | 8550 | 54    |
| H25B | 8410 | 10020 | 8426 | 54    |
| H26A | 7628 | 10630 | 9390 | 53    |
| H26B | 7061 | 9917  | 9438 | 53    |
| H27A | 5929 | 10856 | 9850 | 48    |
| H27B | 5569 | 10829 | 9112 | 48    |
| H29  | 3997 | 11188 | 9623 | 51    |
| H30  | 1979 | 11317 | 9702 | 55    |
| H31  | 459  | 10319 | 9402 | 50    |
| H32  | 913  | 9160  | 8978 | 45    |
| H2A  | 2560 | 6081  | 4946 | 61    |
| H2B  | 2271 | 6051  | 4206 | 61    |
| H3A  | 942  | 6886  | 4529 | 65    |
| H3B  | 467  | 6167  | 4591 | 65    |
| H4A  | -561 | 6805  | 5430 | 63    |
| H4B  | -140 | 7515  | 5340 | 63    |

|      |       |       |       |    |
|------|-------|-------|-------|----|
| H5A  | -521  | 7804  | 6415  | 59 |
| H5B  | 560   | 7406  | 6580  | 59 |
| H6A  | 1617  | 8622  | 7512  | 59 |
| H6B  | 436   | 8902  | 7255  | 59 |
| H7A  | 1770  | 9675  | 7005  | 54 |
| H7B  | 2054  | 9877  | 7794  | 54 |
| H8A  | 4970  | 10017 | 7667  | 52 |
| H8B  | 3864  | 10448 | 7706  | 52 |
| H9A  | 3337  | 9951  | 6500  | 54 |
| H9B  | 4656  | 10486 | 6852  | 54 |
| H10A | 5468  | 9908  | 5915  | 55 |
| H10B | 4175  | 9361  | 5500  | 55 |
| H11A | 5875  | 8871  | 5124  | 53 |
| H11B | 6404  | 8904  | 5854  | 53 |
| H13  | 6977  | 7971  | 5038  | 59 |
| H14  | 7540  | 6846  | 4509  | 70 |
| H15  | 6139  | 5786  | 4148  | 85 |
| H16  | 4180  | 5828  | 4371  | 72 |
| H34A | 6009  | 4294  | 9967  | 78 |
| H34B | 6820  | 4752  | 9706  | 78 |
| H35A | 8042  | 4364  | 10436 | 73 |
| H35B | 7511  | 3550  | 9880  | 73 |
| H36A | 9547  | 3429  | 9768  | 66 |
| H36B | 10081 | 4249  | 10308 | 66 |
| H37A | 10688 | 4490  | 9441  | 69 |
| H37B | 11411 | 3934  | 9613  | 69 |
| H38A | 11772 | 3432  | 8554  | 67 |
| H38B | 11052 | 3948  | 8313  | 67 |
| H39A | 11035 | 2857  | 7385  | 73 |
| H39B | 10314 | 2421  | 7700  | 73 |
| H40A | 8680  | 1967  | 6730  | 70 |
| H40B | 9256  | 2436  | 6399  | 70 |
| H41A | 7536  | 3018  | 6448  | 68 |
| H41B | 7103  | 2167  | 5994  | 68 |
| H42A | 5194  | 2202  | 6180  | 69 |
| H42B | 5458  | 3030  | 6715  | 69 |

|      |       |      |      |     |
|------|-------|------|------|-----|
| H43A | 3870  | 2322 | 6882 | 67  |
| H43B | 4847  | 1862 | 7036 | 67  |
| H45  | 3252  | 1866 | 7549 | 76  |
| H46  | 2501  | 1681 | 8380 | 89  |
| H47  | 3413  | 2382 | 9500 | 95  |
| H48  | 5025  | 3360 | 9830 | 88  |
| H2D  | 1122  | 5062 | 7358 | 99  |
| H3D  | 2541  | 5757 | 8396 | 99  |
| H4D  | 4212  | 5301 | 8752 | 90  |
| H5D  | 4465  | 4150 | 8068 | 88  |
| H6D  | 3046  | 3456 | 7030 | 84  |
| H6DA | 4516  | 4203 | 8040 | 85  |
| H5DA | 3375  | 3577 | 6918 | 77  |
| H4DA | 1625  | 3955 | 6531 | 100 |
| H3DA | 1015  | 4960 | 7265 | 76  |
| H2DA | 2155  | 5586 | 8387 | 103 |
| H2E  | -725  | 5640 | 5887 | 60  |
| H3E  | 1298  | 5492 | 6192 | 64  |
| H4E  | 2223  | 4802 | 5364 | 67  |
| H5E  | 1125  | 4261 | 4232 | 65  |
| H6E  | -898  | 4409 | 3927 | 65  |
| H6EA | 1665  | 4697 | 4831 | 66  |
| H5EA | 66    | 4361 | 3865 | 63  |
| H4EA | -1826 | 4712 | 3961 | 62  |
| H3EA | -2118 | 5398 | 5023 | 63  |
| H2EA | -519  | 5735 | 5989 | 62  |
| H2F  | 8347  | 557  | 6937 | 100 |
| H3F  | 6810  | 1241 | 7128 | 102 |
| H4F  | 6819  | 2023 | 8227 | 104 |
| H5F  | 8365  | 2121 | 9135 | 103 |
| H6F  | 9902  | 1438 | 8944 | 100 |
| H2FA | 9014  | 2035 | 9474 | 98  |
| H3FA | 10000 | 1517 | 8618 | 101 |
| H4FA | 8898  | 1048 | 7490 | 99  |
| H5FA | 6808  | 1098 | 7219 | 104 |
| H6FA | 5822  | 1616 | 8075 | 97  |



**Table S6.** Torsion angles (°) for **1**.

---

|                    |           |
|--------------------|-----------|
| Fe3B-Fe1B-C0B-Fe4B | -80.4(2)  |
| Fe3B-Fe2B-C0B-Fe4B | 80.3(2)   |
| Fe4B-Fe1B-C0B-Fe3B | 80.4(2)   |
| Fe4B-Fe2B-C0B-Fe3B | -80.3(2)  |
| K2-O7-C17-C28      | -39.1(6)  |
| K2-O7-C17-C32      | 139.6(5)  |
| K2-O7-C18-C19      | 31.1(6)   |
| K2-O8-C19-C18      | 67.4(5)   |
| K2-O8-C20-C21      | -67.9(5)  |
| K2-O9-C21-C20      | -27.8(6)  |
| K2-O9-C22-C23      | -54.1(6)  |
| K2-O10-C23-C22     | -44.1(7)  |
| K2-O10-C24-C25     | 50.0(6)   |
| K2-O11-C25-C24     | 49.4(6)   |
| K2-O11-C26-C27     | -60.7(6)  |
| K2-O12-C27-C26     | -37.4(6)  |
| K2-O12-C28-C17     | 38.1(7)   |
| K2-O12-C28-C29     | -141.0(6) |
| K2-C20-C21-O9      | 21.6(5)   |
| K2-C26-C27-O12     | 25.0(4)   |
| K2-O4-C7-C6        | -49.0(7)  |
| K2-O4-C8-C9        | 124.7(5)  |
| K2-C8-C9-K1        | 32.9(5)   |
| K2-C8-C9-O5        | -12.0(8)  |
| K1-O9-C21-C20      | -125.6(4) |
| K1-O9-C22-C23      | 47.2(7)   |
| K1-O1-C1-C12       | -33.8(7)  |
| K1-O1-C1-C16       | 145.8(7)  |
| K1-O1-C2-C3        | 40.0(7)   |
| K1-O2-C3-C2        | 55.4(6)   |
| K1-O2-C4-C5        | -51.8(6)  |
| K1-O3-C5-C4        | -44.0(6)  |
| K1-O3-C6-C7        | 45.1(7)   |
| K1-O4-C7-C6        | 52.4(6)   |

|                 |           |
|-----------------|-----------|
| K1-O4-C8-K2     | -94.5(3)  |
| K1-O4-C8-C9     | 30.2(6)   |
| K1-C4-C5-O3     | 28.7(4)   |
| K1-O5-C9-C8     | 68.1(6)   |
| K1-O5-C10-C11   | -65.2(5)  |
| K1-O6-C11-C10   | -31.2(7)  |
| K1-O6-C12-C1    | 33.5(7)   |
| K1-O6-C12-C13   | -148.8(6) |
| K1-C10-C11-O6   | 21.6(5)   |
| K3-O13-C33-C44  | -37.3(9)  |
| K3-O13-C33-C48  | 145.2(7)  |
| K3-O13-C34-C35  | -56.2(7)  |
| K3-O14-C35-C34  | -44.5(8)  |
| K3-O14-C36-C37  | 41.9(7)   |
| K3-O15-C37-C36  | 57.1(7)   |
| K3-O15-C38-C39  | -58.3(7)  |
| K3-O16-C39-C38  | -36.8(8)  |
| K3-O16-C40-C41  | 30.8(8)   |
| K3-O17-C41-C40  | 62.1(6)   |
| K3-O17-C42-C43  | -69.0(6)  |
| K3-O18-C43-C42  | -27.6(7)  |
| K3-O18-C44-C33  | 25.8(9)   |
| K3-O18-C44-C45  | -153.9(6) |
| O7-C17-C28-O12  | 0.0(8)    |
| O7-C17-C28-C29  | 179.2(6)  |
| O7-C17-C32-C31  | -179.1(6) |
| O7-C18-C19-K2   | -21.2(4)  |
| O7-C18-C19-O8   | -66.1(6)  |
| O8-C20-C21-O9   | 66.7(7)   |
| O9-C22-C23-O10  | 67.1(7)   |
| O10-C24-C25-O11 | -66.6(7)  |
| O11-C26-C27-O12 | 65.1(7)   |
| O12-C28-C29-C30 | 178.5(6)  |
| C17-O7-C18-C19  | 177.1(5)  |
| C17-C28-C29-C30 | -0.6(10)  |
| C18-O7-C17-C28  | 174.1(5)  |

|                 |           |
|-----------------|-----------|
| C18-O7-C17-C32  | -7.2(9)   |
| C19-O8-C20-K2   | -117.2(5) |
| C19-O8-C20-C21  | 174.8(5)  |
| C20-O8-C19-K2   | 117.0(5)  |
| C20-O8-C19-C18  | -175.6(5) |
| C21-O9-C22-C23  | -177.0(5) |
| C22-O9-C21-C20  | 93.9(6)   |
| C23-O10-C24-C25 | -169.3(5) |
| C24-O10-C23-C22 | 176.5(5)  |
| C25-O11-C26-K2  | -126.4(5) |
| C25-O11-C26-C27 | 172.9(5)  |
| C26-O11-C25-C24 | 175.2(6)  |
| C27-O12-C28-C17 | -177.8(5) |
| C27-O12-C28-C29 | 3.0(9)    |
| C28-O12-C27-C26 | 180.0(5)  |
| C28-C17-C32-C31 | -0.6(10)  |
| C28-C29-C30-C31 | 0.9(11)   |
| C29-C30-C31-C32 | -1.0(11)  |
| C30-C31-C32-C17 | 0.9(10)   |
| C32-C17-C28-O12 | -178.7(6) |
| C32-C17-C28-C29 | 0.5(10)   |
| O1-C1-C12-O6    | 0.0(9)    |
| O1-C1-C12-C13   | -177.8(6) |
| O1-C1-C16-C15   | 177.6(7)  |
| O1-C2-C3-O2     | -62.7(7)  |
| C1-O1-C2-C3     | -170.7(6) |
| C1-C12-C13-C14  | -1.8(11)  |
| O2-C4-C5-O3     | 64.1(7)   |
| C2-O1-C1-C12    | 176.9(6)  |
| C2-O1-C1-C16    | -3.4(10)  |
| O3-C6-C7-O4     | -67.1(7)  |
| C3-O2-C4-K1     | -126.6(6) |
| C3-O2-C4-C5     | -178.3(6) |
| O4-C8-C9-K1     | -23.5(5)  |
| O4-C8-C9-O5     | -68.3(7)  |
| C4-O2-C3-C2     | -178.5(6) |

|                 |           |
|-----------------|-----------|
| O5-C10-C11-O6   | 65.9(7)   |
| C5-O3-C6-C7     | -172.2(5) |
| O6-C12-C13-C14  | -179.4(6) |
| C6-O3-C5-C4     | 171.9(6)  |
| C7-O4-C8-K2     | 145.8(6)  |
| C7-O4-C8-C9     | -89.5(7)  |
| C8-O4-C7-C6     | 174.0(5)  |
| C9-O5-C10-K1    | -117.7(5) |
| C9-O5-C10-C11   | 177.1(6)  |
| C10-O5-C9-K1    | 117.2(5)  |
| C10-O5-C9-C8    | -174.6(5) |
| C11-O6-C12-C1   | -176.7(6) |
| C11-O6-C12-C13  | 1.0(10)   |
| C12-C1-C16-C15  | -2.8(12)  |
| C12-O6-C11-C10  | 178.8(6)  |
| C12-C13-C14-C15 | 1.4(12)   |
| C13-C14-C15-C16 | -1.7(13)  |
| C14-C15-C16-C1  | 2.4(13)   |
| C16-C1-C12-O6   | -179.7(7) |
| C16-C1-C12-C13  | 2.5(11)   |
| O13-C33-C44-O18 | 5.3(11)   |
| O13-C33-C44-C45 | -175.0(7) |
| O13-C33-C48-C47 | 176.7(8)  |
| O13-C34-C35-O14 | 67.6(8)   |
| O14-C36-C37-O15 | -67.0(8)  |
| O15-C38-C39-O16 | 63.2(8)   |
| O16-C40-C41-O17 | -62.5(8)  |
| O17-C42-C43-O18 | 64.6(8)   |
| O18-C44-C45-C46 | 177.6(7)  |
| C33-O13-C34-C35 | 92.9(8)   |
| C33-C44-C45-C46 | -2.1(13)  |
| C34-O13-C33-C44 | 177.8(7)  |
| C34-O13-C33-C48 | 0.2(13)   |
| C35-O14-C36-C37 | 178.8(6)  |
| C36-O14-C35-C34 | 179.5(6)  |
| C37-O15-C38-C39 | 174.9(6)  |

|                    |            |
|--------------------|------------|
| C38-O15-C37-C36    | -176.0(6)  |
| C39-O16-C40-C41    | 173.1(6)   |
| C40-O16-C39-C38    | -179.1(7)  |
| C41-O17-C42-C43    | 168.5(6)   |
| C42-O17-C41-C40    | -175.2(6)  |
| C43-O18-C44-C33    | 170.9(7)   |
| C43-O18-C44-C45    | -8.8(11)   |
| C44-O18-C43-C42    | -174.2(6)  |
| C44-C33-C48-C47    | -0.6(14)   |
| C44-C45-C46-C47    | -0.6(14)   |
| C45-C46-C47-C48    | 2.7(16)    |
| C46-C47-C48-C33    | -2.0(15)   |
| C48-C33-C44-O18    | -177.0(7)  |
| C48-C33-C44-C45    | 2.7(13)    |
| C3B-Fe1B-C0B-Fe3B  | -83.2(3)   |
| C3B-Fe1B-C0B-Fe4B  | -163.5(3)  |
| C2B-Fe1B-C0B-Fe3B  | 52.4(6)    |
| C2B-Fe1B-C0B-Fe4B  | -27.9(7)   |
| C1B-Fe1B-C0B-Fe3B  | 173.5(3)   |
| C1B-Fe1B-C0B-Fe4B  | 93.2(3)    |
| C5B-Fe2B-C0B-Fe3B  | 83.4(4)    |
| C5B-Fe2B-C0B-Fe4B  | 163.8(3)   |
| C6B-Fe2B-C0B-Fe3B  | -51.4(7)   |
| C6B-Fe2B-C0B-Fe4B  | 29.0(7)    |
| C4B-Fe2B-C0B-Fe3B  | -177.1(4)  |
| C4B-Fe2B-C0B-Fe4B  | -96.8(4)   |
| Fe3A-Fe1A-C3A-K1   | 102.4(19)  |
| Fe3A-Fe1A-C0A-Fe4A | -80.9(5)   |
| Fe3A-Fe2A-C0A-Fe4A | 80.9(5)    |
| Fe4A-Fe1A-C3A-K1   | 139.5(17)  |
| Fe4A-Fe1A-C0A-Fe3A | 80.9(5)    |
| Fe4A-Fe2A-C0A-Fe3A | -80.9(5)   |
| C1A-Fe1A-C3A-K1    | -12(2)     |
| C1A-Fe1A-C0A-Fe3A  | -86.9(10)  |
| C1A-Fe1A-C0A-Fe4A  | -167.8(10) |
| C2A-Fe1A-C3A-K1    | -118(2)    |

|                     |            |
|---------------------|------------|
| C2A-Fe1A-C0A-Fe3A   | 52(3)      |
| C2A-Fe1A-C0A-Fe4A   | -29(3)     |
| C3A-Fe1A-C0A-Fe3A   | 172.1(8)   |
| C3A-Fe1A-C0A-Fe4A   | 91.2(8)    |
| C0A-Fe1A-C3A-K1     | 91.5(18)   |
| C5A-Fe2A-C0A-Fe3A   | -25(3)     |
| C5A-Fe2A-C0A-Fe4A   | 56(3)      |
| C4A-Fe2A-C0A-Fe3A   | -158.9(8)  |
| C4A-Fe2A-C0A-Fe4A   | -78.0(8)   |
| C6A-Fe2A-C0A-Fe3A   | 96.2(10)   |
| C6A-Fe2A-C0A-Fe4A   | 177.1(10)  |
| F1D-C1D-C2D-C3D     | -176.0(18) |
| F1D-C1D-C6D-C5D     | 176.0(18)  |
| C1D-C2D-C3D-C4D     | 0.0        |
| C2D-C1D-C6D-C5D     | 0.0        |
| C2D-C3D-C4D-C5D     | 0.0        |
| C3D-C4D-C5D-C6D     | 0.0        |
| C4D-C5D-C6D-C1D     | 0.0        |
| C6D-C1D-C2D-C3D     | 0.0        |
| F1DA-C1DA-C6DA-C5DA | -178(3)    |
| F1DA-C1DA-C2DA-C3DA | 177(3)     |
| C1DA-C6DA-C5DA-C4DA | 0.0        |
| C6DA-C1DA-C2DA-C3DA | 0.0        |
| C6DA-C5DA-C4DA-C3DA | 0.0        |
| C5DA-C4DA-C3DA-C2DA | 0.0        |
| C4DA-C3DA-C2DA-C1DA | 0.0        |
| C2DA-C1DA-C6DA-C5DA | 0.0        |
| F1E-C1E-C2E-C3E     | 180(2)     |
| F1E-C1E-C6E-C5E     | -180(2)    |
| C1E-C2E-C3E-C4E     | 0.0        |
| C2E-C1E-C6E-C5E     | 0.0        |
| C2E-C3E-C4E-C5E     | 0.0        |
| C3E-C4E-C5E-C6E     | 0.0        |
| C4E-C5E-C6E-C1E     | 0.0        |
| C6E-C1E-C2E-C3E     | 0.0        |
| F1EA-C1EA-C6EA-C5EA | 175(3)     |

|                     |            |
|---------------------|------------|
| F1EA-C1EA-C2EA-C3EA | -175(3)    |
| C1EA-C6EA-C5EA-C4EA | 0.0        |
| C6EA-C1EA-C2EA-C3EA | 0.0        |
| C6EA-C5EA-C4EA-C3EA | 0.0        |
| C5EA-C4EA-C3EA-C2EA | 0.0        |
| C4EA-C3EA-C2EA-C1EA | 0.0        |
| C2EA-C1EA-C6EA-C5EA | 0.0        |
| F1F-C1F-C2F-C3F     | 174.7(13)  |
| F1F-C1F-C6F-C5F     | -174.7(13) |
| C1F-C2F-C3F-C4F     | 0.0        |
| C2F-C1F-C6F-C5F     | 0.0        |
| C2F-C3F-C4F-C5F     | 0.0        |
| C3F-C4F-C5F-C6F     | 0.0        |
| C4F-C5F-C6F-C1F     | 0.0        |
| C6F-C1F-C2F-C3F     | 0.0        |
| F1FA-C1FA-C2FA-C3FA | 168.4(17)  |
| F1FA-C1FA-C6FA-C5FA | -169.0(16) |
| C1FA-C2FA-C3FA-C4FA | 0.0        |
| C2FA-C1FA-C6FA-C5FA | 0.0        |
| C2FA-C3FA-C4FA-C5FA | 0.0        |
| C3FA-C4FA-C5FA-C6FA | 0.0        |
| C4FA-C5FA-C6FA-C1FA | 0.0        |
| C6FA-C1FA-C2FA-C3FA | 0.0        |

---

**Table S7.** Crystal data and structure refinement for **2**.

|                                   |                                                                                                |                   |
|-----------------------------------|------------------------------------------------------------------------------------------------|-------------------|
| Identification code               | [Fe <sub>4</sub> Mo <sub>2</sub> ] <sup>2-</sup>                                               |                   |
| Empirical formula                 | C <sub>51</sub> H <sub>48</sub> Fe <sub>4</sub> K <sub>2</sub> Mo <sub>2</sub> O <sub>30</sub> |                   |
| Formula weight                    | 1634.37                                                                                        |                   |
| Temperature                       | 100.15 K                                                                                       |                   |
| Wavelength                        | 0.71073 Å                                                                                      |                   |
| Crystal system                    | monoclinic                                                                                     |                   |
| Space group                       | P 1 n 1                                                                                        |                   |
| Unit cell dimensions              | a = 16.9288(3) Å                                                                               | a = 90°.          |
|                                   | b = 8.76190(10) Å                                                                              | b = 92.4690(10)°. |
|                                   | c = 19.7002(3) Å                                                                               | g = 90°.          |
| Volume                            | 2919.39(8) Å <sup>3</sup>                                                                      |                   |
| Z                                 | 2                                                                                              |                   |
| Density (calculated)              | 1.859 Mg/m <sup>3</sup>                                                                        |                   |
| Absorption coefficient            | 1.620 mm <sup>-1</sup>                                                                         |                   |
| F(000)                            | 1640                                                                                           |                   |
| Crystal size                      | 0.29 x 0.22 x 0.18 mm <sup>3</sup>                                                             |                   |
| Theta range for data collection   | 2.069 to 27.484°.                                                                              |                   |
| Index ranges                      | -21 ≤ h ≤ 21, -11 ≤ k ≤ 10, -25 ≤ l ≤ 25                                                       |                   |
| Reflections collected             | 46356                                                                                          |                   |
| Independent reflections           | 13347 [R(int) = 0.0250]                                                                        |                   |
| Completeness to theta = 25.242°   | 99.9 %                                                                                         |                   |
| Absorption correction             | Empirical                                                                                      |                   |
| Max. and min. transmission        | 1.0000 and 0.7843                                                                              |                   |
| Refinement method                 | Full-matrix least-squares on F <sup>2</sup>                                                    |                   |
| Data / restraints / parameters    | 13347 / 1157 / 1164                                                                            |                   |
| Goodness-of-fit on F <sup>2</sup> | 1.033                                                                                          |                   |
| Final R indices [I > 2σ(I)]       | R1 = 0.0249, wR2 = 0.0613                                                                      |                   |
| R indices (all data)              | R1 = 0.0261, wR2 = 0.0619                                                                      |                   |
| Absolute structure parameter      | 0.514(16)                                                                                      |                   |
| Extinction coefficient            | n/a                                                                                            |                   |
| Largest diff. peak and hole       | 0.673 and -0.484 e.Å <sup>-3</sup>                                                             |                   |

**Table S8.** Atomic coordinates ( $\times 10^4$ ) and equivalent isotropic displacement parameters ( $\text{\AA}^2 \times 10^3$ ) for **2**.  $U_{\text{eq}}$  is defined as one third of the trace of the orthogonalized  $U^{ij}$  tensor.

|      | x        | y         | z         | U(eq) |
|------|----------|-----------|-----------|-------|
| Mo1  | 2812(1)  | 6564(1)   | 14087(1)  | 15(1) |
| Mo2  | 4117(1)  | 8790(2)   | 14617(1)  | 14(1) |
| Fe1  | 4991(1)  | 7739(1)   | 13493(1)  | 9(1)  |
| Fe2  | 4396(1)  | 5586(2)   | 14249(1)  | 16(1) |
| Fe3  | 3514(1)  | 8906(2)   | 13238(1)  | 13(1) |
| Fe4  | 3885(2)  | 6073(4)   | 12971(1)  | 18(1) |
| O1A  | 1231(4)  | 8282(9)   | 13813(3)  | 32(1) |
| O2A  | 1792(4)  | 3705(8)   | 13774(3)  | 36(1) |
| O3A  | 2135(9)  | 6340(13)  | 15506(6)  | 27(2) |
| O4A  | 2705(12) | 9660(20)  | 15487(11) | 29(3) |
| O5A  | 4887(13) | 11888(16) | 15108(11) | 20(2) |
| O6A  | 4738(9)  | 7700(20)  | 16039(8)  | 29(3) |
| O7A  | 3438(4)  | 3845(7)   | 15169(4)  | 29(1) |
| O8A  | 3200(5)  | 11738(10) | 13958(4)  | 28(2) |
| O9A  | 5971(4)  | 10042(8)  | 14243(3)  | 32(1) |
| O10A | 5776(5)  | 5316(10)  | 15181(5)  | 38(2) |
| O11A | 4894(5)  | 2813(8)   | 13571(3)  | 24(1) |
| O12A | 6331(4)  | 5695(7)   | 13758(3)  | 25(1) |
| O13A | 5824(7)  | 9026(15)  | 12326(7)  | 31(3) |
| O14A | 1972(5)  | 9624(13)  | 12618(5)  | 26(2) |
| O15A | 4247(4)  | 10767(9)  | 12217(4)  | 29(2) |
| O16A | 3088(8)  | 7342(18)  | 11734(8)  | 26(2) |
| O17A | 5189(9)  | 5140(20)  | 12143(7)  | 25(2) |
| O18A | 2952(9)  | 3379(16)  | 12615(8)  | 28(3) |
| C1A  | 1845(5)  | 7706(11)  | 13893(4)  | 28(2) |
| C2A  | 2188(4)  | 4743(9)   | 13871(4)  | 21(1) |
| C3A  | 2426(14) | 6460(30)  | 14992(10) | 20(4) |
| C4A  | 3190(11) | 9270(20)  | 15125(9)  | 22(3) |
| C5A  | 4566(11) | 10776(17) | 14935(9)  | 12(2) |
| C6A  | 4530(7)  | 8045(14)  | 15495(6)  | 16(2) |
| C7A  | 3632(5)  | 4674(9)   | 14759(5)  | 24(2) |

|      |          |           |           |       |
|------|----------|-----------|-----------|-------|
| C8A  | 3439(5)  | 10537(9)  | 13878(4)  | 17(2) |
| C9A  | 5466(5)  | 9231(9)   | 14054(4)  | 24(2) |
| C10A | 5210(6)  | 5549(11)  | 14849(5)  | 21(1) |
| C11A | 4668(6)  | 3904(13)  | 13806(5)  | 19(2) |
| C12A | 5775(4)  | 6451(8)   | 13688(3)  | 16(1) |
| C13A | 5462(10) | 8546(19)  | 12757(7)  | 14(3) |
| C14A | 2560(9)  | 9294(19)  | 12881(10) | 21(3) |
| C15A | 3993(4)  | 10060(9)  | 12642(4)  | 18(1) |
| C16A | 3308(10) | 6947(19)  | 12268(10) | 30(3) |
| C17A | 4700(9)  | 5511(16)  | 12501(7)  | 17(2) |
| C18A | 3277(17) | 4440(20)  | 12802(15) | 18(4) |
| C19A | 3920(5)  | 7287(11)  | 13791(5)  | 11(2) |
| Mo3  | 4991(1)  | 8341(2)   | 3649(1)   | 27(1) |
| Mo4  | 3696(1)  | 6164(3)   | 3118(1)   | 24(1) |
| Fe5  | 2809(1)  | 7191(2)   | 4245(1)   | 19(1) |
| Fe6  | 3420(1)  | 9325(3)   | 3474(1)   | 31(1) |
| Fe7  | 4298(1)  | 6018(2)   | 4495(1)   | 24(1) |
| Fe8  | 3917(2)  | 8852(5)   | 4758(2)   | 22(1) |
| O1B  | 6012(6)  | 11201(14) | 4018(6)   | 52(3) |
| O2B  | 5652(11) | 8670(20)  | 2283(10)  | 34(4) |
| O3B  | 6529(8)  | 6504(18)  | 3908(6)   | 58(3) |
| O4B  | 2933(14) | 3080(20)  | 2624(12)  | 23(4) |
| O5B  | 5096(15) | 5250(40)  | 2285(11)  | 40(5) |
| O6B  | 3262(13) | 7540(30)  | 1743(12)  | 39(5) |
| O7B  | 4358(7)  | 11092(12) | 2537(6)   | 40(2) |
| O8B  | 4638(8)  | 3180(15)  | 3779(7)   | 36(3) |
| O9B  | 1820(6)  | 4881(14)  | 3525(5)   | 46(2) |
| O10B | 2137(9)  | 9820(20)  | 2461(8)   | 37(4) |
| O11B | 2960(8)  | 12126(13) | 4162(6)   | 40(3) |
| O12B | 1457(6)  | 9201(13)  | 3970(5)   | 40(2) |
| O13B | 2024(15) | 5930(20)  | 5423(11)  | 45(5) |
| O14B | 5610(6)  | 5128(12)  | 5332(5)   | 23(2) |
| O15B | 3557(6)  | 4162(12)  | 5515(6)   | 38(2) |
| O16B | 4583(14) | 7480(30)  | 6024(12)  | 31(4) |
| O17B | 2607(17) | 9950(30)  | 5555(17)  | 34(5) |
| O18B | 4830(20) | 11550(30) | 5140(17)  | 31(5) |

|      |          |           |          |       |
|------|----------|-----------|----------|-------|
| C1B  | 5638(9)  | 10127(18) | 3934(8)  | 43(3) |
| C2B  | 5391(18) | 8480(40)  | 2831(12) | 36(6) |
| C3B  | 5973(8)  | 7277(17)  | 3855(7)  | 36(3) |
| C4B  | 3240(20) | 4180(30)  | 2800(20) | 16(5) |
| C5B  | 4612(16) | 5760(30)  | 2619(12) | 33(6) |
| C6B  | 3459(12) | 7210(20)  | 2296(12) | 22(4) |
| C7B  | 4134(9)  | 10281(16) | 2964(9)  | 40(3) |
| C8B  | 4402(10) | 4354(16)  | 3892(7)  | 31(3) |
| C9B  | 2330(7)  | 5695(16)  | 3702(7)  | 36(3) |
| C10B | 2657(13) | 9570(30)  | 2846(13) | 20(4) |
| C11B | 3165(11) | 11010(20) | 3924(9)  | 33(4) |
| C12B | 2031(7)  | 8510(15)  | 4059(6)  | 30(2) |
| C13B | 2321(19) | 6400(50)  | 4957(15) | 22(6) |
| C14B | 5124(8)  | 5326(15)  | 4933(6)  | 21(1) |
| C15B | 3806(8)  | 4883(14)  | 5098(7)  | 30(2) |
| C16B | 4333(12) | 7840(30)  | 5488(12) | 34(5) |
| C17B | 3097(16) | 9480(30)  | 5236(13) | 21(4) |
| C18B | 4512(19) | 10460(30) | 4928(17) | 29(6) |
| C19B | 3846(10) | 7694(17)  | 3955(9)  | 23(3) |
| K1   | 3730(1)  | 9368(1)   | 10731(1) | 22(1) |
| O1   | 3186(2)  | 6770(3)   | 10003(2) | 20(1) |
| O2   | 2180(2)  | 9127(3)   | 10359(2) | 20(1) |
| O3   | 2754(2)  | 11825(3)  | 10920(2) | 21(1) |
| O4   | 4346(2)  | 12328(3)  | 10677(2) | 23(1) |
| O5   | 5314(2)  | 9752(4)   | 10623(2) | 27(1) |
| O6   | 4653(2)  | 6872(3)   | 10381(2) | 24(1) |
| C1   | 3688(3)  | 6022(5)   | 9587(2)  | 19(1) |
| C2   | 3444(3)  | 5184(5)   | 9021(2)  | 24(1) |
| C3   | 4008(3)  | 4433(5)   | 8644(2)  | 31(1) |
| C4   | 4798(3)  | 4540(6)   | 8831(2)  | 34(1) |
| C5   | 5041(3)  | 5377(6)   | 9399(2)  | 30(1) |
| C6   | 4492(3)  | 6093(5)   | 9788(2)  | 23(1) |
| C7   | 2362(3)  | 6777(5)   | 9791(2)  | 22(1) |
| C8   | 1922(3)  | 7588(5)   | 10325(2) | 23(1) |
| C9   | 1703(3)  | 10051(5)  | 10772(2) | 24(1) |
| C10  | 1948(3)  | 11670(5)  | 10682(2) | 23(1) |

|     |         |          |          |       |
|-----|---------|----------|----------|-------|
| C11 | 3051(3) | 13304(5) | 10785(2) | 23(1) |
| C12 | 3895(3) | 13394(5) | 11046(2) | 23(1) |
| C13 | 5159(3) | 12383(5) | 10881(3) | 30(1) |
| C14 | 5589(3) | 11233(5) | 10469(3) | 30(1) |
| C15 | 5771(3) | 8569(6)  | 10356(3) | 30(1) |
| C16 | 5455(3) | 7102(6)  | 10623(3) | 29(1) |
| K2  | 4072(1) | 5674(1)  | 7024(1)  | 23(1) |
| O7  | 3139(2) | 8163(3)  | 7355(2)  | 24(1) |
| O8  | 2492(2) | 5262(4)  | 7113(2)  | 27(1) |
| O9  | 3455(2) | 2705(3)  | 7057(2)  | 22(1) |
| O10 | 5051(2) | 3219(3)  | 6842(2)  | 20(1) |
| O11 | 5619(2) | 5915(3)  | 7417(2)  | 21(1) |
| O12 | 4602(2) | 8292(3)  | 7750(2)  | 20(1) |
| C17 | 3291(3) | 8940(5)  | 7955(2)  | 20(1) |
| C18 | 2730(3) | 9650(5)  | 8341(2)  | 27(1) |
| C19 | 2973(3) | 10480(5) | 8912(2)  | 32(1) |
| C20 | 3753(3) | 10609(5) | 9102(2)  | 29(1) |
| C21 | 4320(3) | 9872(5)  | 8729(2)  | 24(1) |
| C22 | 4093(3) | 9037(5)  | 8159(2)  | 19(1) |
| C23 | 2335(3) | 7927(5)  | 7112(3)  | 26(1) |
| C24 | 2015(3) | 6478(6)  | 7371(3)  | 29(1) |
| C25 | 2199(3) | 3791(5)  | 7250(3)  | 31(1) |
| C26 | 2640(3) | 2671(5)  | 6844(3)  | 27(1) |
| C27 | 3913(3) | 1659(5)  | 6687(2)  | 25(1) |
| C28 | 4749(3) | 1732(5)  | 6955(2)  | 24(1) |
| C29 | 5845(3) | 3377(5)  | 7085(2)  | 23(1) |
| C30 | 6094(3) | 5006(5)  | 7003(2)  | 24(1) |
| C31 | 5871(3) | 7468(5)  | 7444(2)  | 22(1) |
| C32 | 5420(3) | 8276(5)  | 7969(2)  | 21(1) |

---

**Table S9.** Bond lengths [Å] and angles [°] for **2**.

|          |            |           |           |
|----------|------------|-----------|-----------|
| Mo1-Mo2  | 3.0944(16) | Fe3-C19A  | 1.899(8)  |
| Mo1-Fe2  | 2.8199(15) | Fe4-C16A  | 1.828(18) |
| Mo1-Fe3  | 2.9299(15) | Fe4-C17A  | 1.764(16) |
| Mo1-Fe4  | 2.9432(19) | Fe4-C18A  | 1.783(18) |
| Mo1-C1A  | 1.942(8)   | Fe4-C19A  | 1.933(11) |
| Mo1-C2A  | 1.950(8)   | O1A-C1A   | 1.160(9)  |
| Mo1-C3A  | 1.927(19)  | O2A-C2A   | 1.142(9)  |
| Mo1-C7A  | 2.503(9)   | O3A-C3A   | 1.149(14) |
| Mo1-C19A | 2.087(8)   | O4A-C4A   | 1.160(14) |
| Mo2-Fe1  | 2.8668(16) | O5A-C5A   | 1.160(13) |
| Mo2-Fe2  | 2.942(2)   | O6A-C6A   | 1.152(13) |
| Mo2-Fe3  | 2.8614(18) | O7A-C7A   | 1.146(9)  |
| Mo2-C4A  | 1.945(17)  | O8A-C8A   | 1.141(10) |
| Mo2-C5A  | 1.989(16)  | O9A-C9A   | 1.160(10) |
| Mo2-C6A  | 1.951(12)  | O10A-C10A | 1.155(12) |
| Mo2-C8A  | 2.374(9)   | O11A-C11A | 1.136(12) |
| Mo2-C9A  | 2.610(8)   | O12A-C12A | 1.154(8)  |
| Mo2-C19A | 2.108(11)  | O13A-C13A | 1.148(14) |
| Fe1-Fe2  | 2.6310(17) | O14A-C14A | 1.141(13) |
| Fe1-Fe3  | 2.7282(18) | O15A-C15A | 1.141(9)  |
| Fe1-Fe4  | 2.555(3)   | O15A-K1   | 3.259(8)  |
| Fe1-C9A  | 1.872(7)   | O16A-C16A | 1.155(14) |
| Fe1-C12A | 1.773(7)   | O16A-K1   | 2.901(16) |
| Fe1-C13A | 1.827(14)  | O17A-C17A | 1.157(13) |
| Fe1-C19A | 1.970(8)   | O18A-C18A | 1.136(15) |
| Fe2-Fe4  | 2.661(3)   | Mo3-Mo4   | 3.055(3)  |
| Fe2-C7A  | 1.852(7)   | Mo3-Fe6   | 2.802(3)  |
| Fe2-C10A | 1.777(10)  | Mo3-Fe7   | 2.910(2)  |
| Fe2-C11A | 1.784(12)  | Mo3-Fe8   | 2.936(3)  |
| Fe2-C19A | 1.903(8)   | Mo3-C1B   | 1.978(15) |
| Fe3-Fe4  | 2.620(3)   | Mo3-C2B   | 1.78(2)   |
| Fe3-C8A  | 1.914(8)   | Mo3-C3B   | 1.934(12) |
| Fe3-C14A | 1.765(14)  | Mo3-C7B   | 2.579(15) |
| Fe3-C15A | 1.773(8)   | Mo3-C19B  | 2.131(17) |

|          |           |           |           |
|----------|-----------|-----------|-----------|
| Mo4-Fe5  | 2.879(3)  | O8B-C8B   | 1.130(15) |
| Mo4-Fe6  | 2.900(4)  | O9B-C9B   | 1.162(14) |
| Mo4-Fe7  | 2.860(3)  | O10B-C10B | 1.159(17) |
| Mo4-C4B  | 1.99(3)   | O11B-C11B | 1.147(16) |
| Mo4-C5B  | 1.90(2)   | O12B-C12B | 1.151(13) |
| Mo4-C6B  | 1.89(2)   | O13B-C13B | 1.144(19) |
| Mo4-C8B  | 2.473(16) | O14B-C14B | 1.127(14) |
| Mo4-C19B | 2.132(17) | O15B-C15B | 1.132(13) |
| Fe5-Fe6  | 2.648(3)  | O15B-K2   | 3.337(13) |
| Fe5-Fe7  | 2.746(3)  | O16B-C16B | 1.164(18) |
| Fe5-Fe8  | 2.547(4)  | O16B-K2   | 2.70(2)   |
| Fe5-C9B  | 1.856(12) | O17B-C17B | 1.136(18) |
| Fe5-C12B | 1.779(12) | O18B-C18B | 1.168(17) |
| Fe5-C13B | 1.80(3)   | K1-O1     | 2.823(3)  |
| Fe5-C19B | 1.921(17) | K1-O2     | 2.702(3)  |
| Fe6-Fe8  | 2.663(4)  | K1-O3     | 2.749(3)  |
| Fe6-C7B  | 1.810(13) | K1-O4     | 2.800(3)  |
| Fe6-C10B | 1.76(2)   | K1-O5     | 2.721(3)  |
| Fe6-C11B | 1.783(19) | K1-O6     | 2.791(3)  |
| Fe6-C19B | 1.845(15) | O1-C1     | 1.373(5)  |
| Fe7-Fe8  | 2.623(4)  | O1-C7     | 1.439(5)  |
| Fe7-C8B  | 1.893(15) | O2-C8     | 1.419(5)  |
| Fe7-C14B | 1.721(13) | O2-C9     | 1.423(5)  |
| Fe7-C15B | 1.783(11) | O3-C10    | 1.430(6)  |
| Fe7-C19B | 1.950(15) | O3-C11    | 1.419(5)  |
| Fe8-C16B | 1.81(2)   | O4-C12    | 1.426(5)  |
| Fe8-C17B | 1.80(3)   | O4-C13    | 1.418(6)  |
| Fe8-C18B | 1.75(3)   | O5-C14    | 1.416(6)  |
| Fe8-C19B | 1.878(18) | O5-C15    | 1.408(6)  |
| O1B-C1B  | 1.143(15) | O6-C6     | 1.371(5)  |
| O2B-C2B  | 1.195(18) | O6-C16    | 1.434(6)  |
| O3B-C3B  | 1.161(13) | C1-C2     | 1.384(6)  |
| O4B-C4B  | 1.141(18) | C1-C6     | 1.401(6)  |
| O5B-C5B  | 1.163(17) | C2-H2     | 0.95      |
| O6B-C6B  | 1.162(17) | C2-C3     | 1.400(7)  |
| O7B-C7B  | 1.176(15) | C3-H3     | 0.95      |

|          |          |          |          |
|----------|----------|----------|----------|
| C3-C4    | 1.375(8) | O7-C17   | 1.378(5) |
| C4-H4    | 0.95     | O7-C23   | 1.438(6) |
| C4-C5    | 1.385(7) | O8-C24   | 1.441(6) |
| C5-H5    | 0.95     | O8-C25   | 1.411(6) |
| C5-C6    | 1.380(6) | O9-C26   | 1.426(6) |
| C7-H7A   | 0.99     | O9-C27   | 1.421(5) |
| C7-H7B   | 0.99     | O10-C28  | 1.420(5) |
| C7-C8    | 1.495(6) | O10-C29  | 1.414(6) |
| C8-H8A   | 0.99     | O11-C30  | 1.416(5) |
| C8-H8B   | 0.99     | O11-C31  | 1.427(5) |
| C9-H9A   | 0.99     | O12-C22  | 1.370(5) |
| C9-H9B   | 0.99     | O12-C32  | 1.434(5) |
| C9-C10   | 1.491(6) | C17-C18  | 1.389(6) |
| C10-H10A | 0.99     | C17-C22  | 1.402(6) |
| C10-H10B | 0.99     | C18-H18  | 0.95     |
| C11-H11A | 0.99     | C18-C19  | 1.387(7) |
| C11-H11B | 0.99     | C19-H19  | 0.95     |
| C11-C12  | 1.500(7) | C19-C20  | 1.363(8) |
| C12-H12A | 0.99     | C20-H20  | 0.95     |
| C12-H12B | 0.99     | C20-C21  | 1.392(6) |
| C13-H13A | 0.99     | C21-H21  | 0.95     |
| C13-H13B | 0.99     | C21-C22  | 1.381(6) |
| C13-C14  | 1.501(7) | C23-H23A | 0.99     |
| C14-H14A | 0.99     | C23-H23B | 0.99     |
| C14-H14B | 0.99     | C23-C24  | 1.479(7) |
| C15-H15A | 0.99     | C24-H24A | 0.99     |
| C15-H15B | 0.99     | C24-H24B | 0.99     |
| C15-C16  | 1.497(7) | C25-H25A | 0.99     |
| C16-H16A | 0.99     | C25-H25B | 0.99     |
| C16-H16B | 0.99     | C25-C26  | 1.487(7) |
| K2-O7    | 2.787(3) | C26-H26A | 0.99     |
| K2-O8    | 2.713(3) | C26-H26B | 0.99     |
| K2-O9    | 2.805(3) | C27-H27A | 0.99     |
| K2-O10   | 2.748(3) | C27-H27B | 0.99     |
| K2-O11   | 2.706(3) | C27-C28  | 1.490(7) |
| K2-O12   | 2.829(3) | C28-H28A | 0.99     |

|              |           |              |            |
|--------------|-----------|--------------|------------|
| C28-H28B     | 0.99      | C31-H31A     | 0.99       |
| C29-H29A     | 0.99      | C31-H31B     | 0.99       |
| C29-H29B     | 0.99      | C31-C32      | 1.490(6)   |
| C29-C30      | 1.499(6)  | C32-H32A     | 0.99       |
| C30-H30A     | 0.99      | C32-H32B     | 0.99       |
| C30-H30B     | 0.99      |              |            |
| Fe2-Mo1-Mo2  | 59.45(4)  | C7A-Mo1-Fe3  | 122.39(17) |
| Fe2-Mo1-Fe3  | 82.56(4)  | C7A-Mo1-Fe4  | 87.24(18)  |
| Fe2-Mo1-Fe4  | 54.94(7)  | C19A-Mo1-Mo2 | 42.7(3)    |
| Fe3-Mo1-Mo2  | 56.64(4)  | C19A-Mo1-Fe2 | 42.4(2)    |
| Fe3-Mo1-Fe4  | 52.98(7)  | C19A-Mo1-Fe3 | 40.2(2)    |
| Fe4-Mo1-Mo2  | 83.64(7)  | C19A-Mo1-Fe4 | 40.9(3)    |
| C1A-Mo1-Mo2  | 109.0(3)  | C19A-Mo1-C7A | 82.2(3)    |
| C1A-Mo1-Fe2  | 165.5(3)  | Fe1-Mo2-Mo1  | 85.52(5)   |
| C1A-Mo1-Fe3  | 83.5(3)   | Fe1-Mo2-Fe2  | 53.84(4)   |
| C1A-Mo1-Fe4  | 118.1(2)  | Fe2-Mo2-Mo1  | 55.63(4)   |
| C1A-Mo1-C2A  | 86.3(4)   | Fe3-Mo2-Mo1  | 58.78(4)   |
| C1A-Mo1-C7A  | 152.7(3)  | Fe3-Mo2-Fe1  | 56.88(4)   |
| C1A-Mo1-C19A | 123.3(4)  | Fe3-Mo2-Fe2  | 81.65(5)   |
| C2A-Mo1-Mo2  | 164.0(2)  | C4A-Mo2-Mo1  | 74.4(6)    |
| C2A-Mo1-Fe2  | 106.2(2)  | C4A-Mo2-Fe1  | 157.3(6)   |
| C2A-Mo1-Fe3  | 132.7(2)  | C4A-Mo2-Fe2  | 118.4(6)   |
| C2A-Mo1-Fe4  | 93.6(2)   | C4A-Mo2-Fe3  | 102.6(6)   |
| C2A-Mo1-C7A  | 81.7(3)   | C4A-Mo2-C5A  | 87.3(8)    |
| C2A-Mo1-C19A | 132.2(4)  | C4A-Mo2-C6A  | 83.2(7)    |
| C3A-Mo1-Mo2  | 89.0(8)   | C4A-Mo2-C8A  | 78.2(6)    |
| C3A-Mo1-Fe2  | 103.9(7)  | C4A-Mo2-C9A  | 158.0(6)   |
| C3A-Mo1-Fe3  | 136.2(8)  | C4A-Mo2-C19A | 115.4(6)   |
| C3A-Mo1-Fe4  | 158.3(7)  | C5A-Mo2-Mo1  | 156.2(5)   |
| C3A-Mo1-C1A  | 83.7(8)   | C5A-Mo2-Fe1  | 108.8(6)   |
| C3A-Mo1-C2A  | 87.8(9)   | C5A-Mo2-Fe2  | 148.1(5)   |
| C3A-Mo1-C7A  | 71.5(8)   | C5A-Mo2-Fe3  | 112.6(5)   |
| C3A-Mo1-C19A | 128.1(8)  | C5A-Mo2-C8A  | 78.3(5)    |
| C7A-Mo1-Mo2  | 82.3(2)   | C5A-Mo2-C9A  | 71.0(6)    |
| C7A-Mo1-Fe2  | 40.17(17) | C5A-Mo2-C19A | 146.7(6)   |

|              |            |               |          |
|--------------|------------|---------------|----------|
| C6A-Mo2-Mo1  | 108.2(4)   | C12A-Fe1-Fe3  | 162.0(3) |
| C6A-Mo2-Fe1  | 113.6(4)   | C12A-Fe1-Fe4  | 104.6(3) |
| C6A-Mo2-Fe2  | 81.0(4)    | C12A-Fe1-C9A  | 91.0(4)  |
| C6A-Mo2-Fe3  | 162.4(4)   | C12A-Fe1-C13A | 94.0(6)  |
| C6A-Mo2-C5A  | 84.0(6)    | C12A-Fe1-C19A | 119.9(3) |
| C6A-Mo2-C8A  | 154.8(4)   | C13A-Fe1-Mo2  | 138.2(5) |
| C6A-Mo2-C9A  | 98.0(4)    | C13A-Fe1-Fe2  | 156.6(5) |
| C6A-Mo2-C19A | 120.9(4)   | C13A-Fe1-Fe3  | 97.9(5)  |
| C8A-Mo2-Mo1  | 83.1(2)    | C13A-Fe1-Fe4  | 103.9(5) |
| C8A-Mo2-Fe1  | 89.2(2)    | C13A-Fe1-C9A  | 90.4(6)  |
| C8A-Mo2-Fe2  | 122.89(19) | C13A-Fe1-C19A | 138.9(6) |
| C8A-Mo2-Fe3  | 41.59(19)  | C19A-Fe1-Mo2  | 47.3(3)  |
| C8A-Mo2-C9A  | 93.1(3)    | C19A-Fe1-Fe2  | 46.1(2)  |
| C9A-Mo2-Mo1  | 125.14(17) | C19A-Fe1-Fe3  | 44.1(2)  |
| C9A-Mo2-Fe1  | 39.63(16)  | C19A-Fe1-Fe4  | 48.5(3)  |
| C9A-Mo2-Fe2  | 83.37(18)  | Mo1-Fe2-Mo2   | 64.92(4) |
| C9A-Mo2-Fe3  | 82.84(17)  | Fe1-Fe2-Mo1   | 95.93(5) |
| C19A-Mo2-Mo1 | 42.2(2)    | Fe1-Fe2-Mo2   | 61.62(4) |
| C19A-Mo2-Fe1 | 43.4(2)    | Fe1-Fe2-Fe4   | 57.73(8) |
| C19A-Mo2-Fe2 | 40.2(2)    | Fe4-Fe2-Mo1   | 64.89(5) |
| C19A-Mo2-Fe3 | 41.6(2)    | Fe4-Fe2-Mo2   | 91.78(8) |
| C19A-Mo2-C8A | 82.7(3)    | C7A-Fe2-Mo1   | 60.7(3)  |
| C19A-Mo2-C9A | 83.0(3)    | C7A-Fe2-Mo2   | 98.9(3)  |
| Fe2-Fe1-Mo2  | 64.54(5)   | C7A-Fe2-Fe1   | 155.5(3) |
| Fe2-Fe1-Fe3  | 90.13(6)   | C7A-Fe2-Fe4   | 112.1(3) |
| Fe3-Fe1-Mo2  | 61.46(5)   | C7A-Fe2-C19A  | 107.7(4) |
| Fe4-Fe1-Mo2  | 95.78(7)   | C10A-Fe2-Mo1  | 142.0(3) |
| Fe4-Fe1-Fe2  | 61.72(8)   | C10A-Fe2-Mo2  | 89.0(3)  |
| Fe4-Fe1-Fe3  | 59.35(7)   | C10A-Fe2-Fe1  | 94.8(3)  |
| C9A-Fe1-Mo2  | 62.8(3)    | C10A-Fe2-Fe4  | 147.5(3) |
| C9A-Fe1-Fe2  | 109.4(3)   | C10A-Fe2-C7A  | 99.9(4)  |
| C9A-Fe1-Fe3  | 102.4(2)   | C10A-Fe2-C11A | 95.8(5)  |
| C9A-Fe1-Fe4  | 157.8(3)   | C10A-Fe2-C19A | 129.1(4) |
| C9A-Fe1-C19A | 110.0(4)   | C11A-Fe2-Mo1  | 117.4(3) |
| C12A-Fe1-Mo2 | 116.3(2)   | C11A-Fe2-Mo2  | 163.0(3) |
| C12A-Fe1-Fe2 | 73.9(2)    | C11A-Fe2-Fe1  | 101.6(3) |

|               |          |               |           |
|---------------|----------|---------------|-----------|
| C11A-Fe2-Fe4  | 75.5(3)  | Fe1-Fe4-Fe2   | 60.55(8)  |
| C11A-Fe2-C7A  | 96.3(4)  | Fe1-Fe4-Fe3   | 63.63(8)  |
| C11A-Fe2-C19A | 121.9(4) | Fe2-Fe4-Mo1   | 60.17(6)  |
| C19A-Fe2-Mo1  | 47.7(2)  | Fe3-Fe4-Mo1   | 63.25(6)  |
| C19A-Fe2-Mo2  | 45.6(3)  | Fe3-Fe4-Fe2   | 91.88(9)  |
| C19A-Fe2-Fe1  | 48.3(2)  | C16A-Fe4-Mo1  | 100.2(6)  |
| C19A-Fe2-Fe4  | 46.5(3)  | C16A-Fe4-Fe1  | 115.1(5)  |
| Mo2-Fe3-Mo1   | 64.58(4) | C16A-Fe4-Fe2  | 157.7(6)  |
| Fe1-Fe3-Mo1   | 91.36(5) | C16A-Fe4-Fe3  | 68.3(6)   |
| Fe1-Fe3-Mo2   | 61.66(4) | C16A-Fe4-C19A | 113.5(6)  |
| Fe4-Fe3-Mo1   | 63.77(6) | C17A-Fe4-Mo1  | 162.7(5)  |
| Fe4-Fe3-Mo2   | 94.48(8) | C17A-Fe4-Fe1  | 78.1(5)   |
| Fe4-Fe3-Fe1   | 57.02(7) | C17A-Fe4-Fe2  | 102.9(5)  |
| C8A-Fe3-Mo1   | 96.2(3)  | C17A-Fe4-Fe3  | 124.7(5)  |
| C8A-Fe3-Mo2   | 55.4(3)  | C17A-Fe4-C16A | 97.1(7)   |
| C8A-Fe3-Fe1   | 104.2(3) | C17A-Fe4-C18A | 97.9(11)  |
| C8A-Fe3-Fe4   | 149.7(3) | C17A-Fe4-C19A | 126.6(5)  |
| C14A-Fe3-Mo1  | 88.6(6)  | C18A-Fe4-Mo1  | 83.5(10)  |
| C14A-Fe3-Mo2  | 131.9(7) | C18A-Fe4-Fe1  | 160.0(9)  |
| C14A-Fe3-Fe1  | 163.8(7) | C18A-Fe4-Fe2  | 102.1(10) |
| C14A-Fe3-Fe4  | 109.0(6) | C18A-Fe4-Fe3  | 130.9(9)  |
| C14A-Fe3-C8A  | 91.9(7)  | C18A-Fe4-C16A | 84.8(11)  |
| C14A-Fe3-C15A | 93.6(7)  | C18A-Fe4-C19A | 126.4(11) |
| C14A-Fe3-C19A | 132.4(6) | C19A-Fe4-Mo1  | 45.0(2)   |
| C15A-Fe3-Mo1  | 170.3(3) | C19A-Fe4-Fe1  | 49.7(3)   |
| C15A-Fe3-Mo2  | 119.6(3) | C19A-Fe4-Fe2  | 45.6(2)   |
| C15A-Fe3-Fe1  | 83.9(2)  | C19A-Fe4-Fe3  | 46.3(3)   |
| C15A-Fe3-Fe4  | 106.7(3) | C15A-O15A-K1  | 111.0(6)  |
| C15A-Fe3-C8A  | 93.2(4)  | C16A-O16A-K1  | 133.5(12) |
| C15A-Fe3-C19A | 129.9(3) | O1A-C1A-Mo1   | 173.4(8)  |
| C19A-Fe3-Mo1  | 45.2(2)  | O2A-C2A-Mo1   | 175.8(6)  |
| C19A-Fe3-Mo2  | 47.5(3)  | O3A-C3A-Mo1   | 174(2)    |
| C19A-Fe3-Fe1  | 46.2(2)  | O4A-C4A-Mo2   | 171.2(19) |
| C19A-Fe3-Fe4  | 47.4(3)  | O5A-C5A-Mo2   | 174.5(18) |
| C19A-Fe3-C8A  | 102.3(4) | O6A-C6A-Mo2   | 174.1(13) |
| Fe1-Fe4-Mo1   | 94.65(9) | Fe2-C7A-Mo1   | 79.2(3)   |

|               |           |              |           |
|---------------|-----------|--------------|-----------|
| O7A-C7A-Mo1   | 128.5(6)  | Fe7-Mo3-Fe8  | 53.32(10) |
| O7A-C7A-Fe2   | 152.2(8)  | Fe8-Mo3-Mo4  | 83.80(9)  |
| Fe3-C8A-Mo2   | 83.0(3)   | C1B-Mo3-Mo4  | 166.2(5)  |
| O8A-C8A-Mo2   | 132.5(7)  | C1B-Mo3-Fe6  | 107.6(5)  |
| O8A-C8A-Fe3   | 144.4(8)  | C1B-Mo3-Fe7  | 128.6(5)  |
| Fe1-C9A-Mo2   | 77.6(3)   | C1B-Mo3-Fe8  | 91.2(4)   |
| O9A-C9A-Mo2   | 127.0(6)  | C1B-Mo3-C7B  | 85.3(7)   |
| O9A-C9A-Fe1   | 155.3(7)  | C1B-Mo3-C19B | 129.0(6)  |
| O10A-C10A-Fe2 | 168.8(9)  | C2B-Mo3-Mo4  | 91.7(10)  |
| O11A-C11A-Fe2 | 173.5(9)  | C2B-Mo3-Fe6  | 105.2(10) |
| O12A-C12A-Fe1 | 172.2(6)  | C2B-Mo3-Fe7  | 138.3(11) |
| O13A-C13A-Fe1 | 173.7(15) | C2B-Mo3-Fe8  | 159.2(10) |
| O14A-C14A-Fe3 | 174.6(16) | C2B-Mo3-C1B  | 88.4(11)  |
| O15A-C15A-Fe3 | 173.8(8)  | C2B-Mo3-C3B  | 82.4(11)  |
| O16A-C16A-Fe4 | 163.2(16) | C2B-Mo3-C7B  | 72.9(11)  |
| O17A-C17A-Fe4 | 173.9(13) | C2B-Mo3-C19B | 131.4(11) |
| O18A-C18A-Fe4 | 170(3)    | C3B-Mo3-Mo4  | 111.6(5)  |
| Mo1-C19A-Mo2  | 95.1(4)   | C3B-Mo3-Fe6  | 167.6(4)  |
| Fe1-C19A-Mo1  | 173.9(6)  | C3B-Mo3-Fe7  | 84.6(4)   |
| Fe1-C19A-Mo2  | 89.3(4)   | C3B-Mo3-Fe8  | 118.1(4)  |
| Fe2-C19A-Mo1  | 89.8(3)   | C3B-Mo3-C1B  | 82.0(7)   |
| Fe2-C19A-Mo2  | 94.2(4)   | C3B-Mo3-C7B  | 152.5(5)  |
| Fe2-C19A-Fe1  | 85.6(3)   | C3B-Mo3-C19B | 126.6(6)  |
| Fe2-C19A-Fe4  | 87.8(4)   | C7B-Mo3-Mo4  | 81.5(4)   |
| Fe3-C19A-Mo1  | 94.5(4)   | C7B-Mo3-Fe6  | 39.0(3)   |
| Fe3-C19A-Mo2  | 91.0(4)   | C7B-Mo3-Fe7  | 122.0(3)  |
| Fe3-C19A-Fe1  | 89.7(3)   | C7B-Mo3-Fe8  | 86.3(3)   |
| Fe3-C19A-Fe2  | 172.9(6)  | C19B-Mo3-Mo4 | 44.2(5)   |
| Fe3-C19A-Fe4  | 86.3(4)   | C19B-Mo3-Fe6 | 41.2(4)   |
| Fe4-C19A-Mo1  | 94.1(4)   | C19B-Mo3-Fe7 | 42.1(4)   |
| Fe4-C19A-Mo2  | 170.6(4)  | C19B-Mo3-Fe8 | 39.7(5)   |
| Fe4-C19A-Fe1  | 81.8(4)   | C19B-Mo3-C7B | 80.0(5)   |
| Fe6-Mo3-Mo4   | 59.15(8)  | Fe5-Mo4-Mo3  | 86.04(9)  |
| Fe6-Mo3-Fe7   | 83.23(7)  | Fe5-Mo4-Fe6  | 54.55(7)  |
| Fe6-Mo3-Fe8   | 55.25(10) | Fe6-Mo4-Mo3  | 56.07(7)  |
| Fe7-Mo3-Mo4   | 57.24(7)  | Fe7-Mo4-Mo3  | 58.82(7)  |

|              |           |               |           |
|--------------|-----------|---------------|-----------|
| Fe7-Mo4-Fe5  | 57.18(7)  | Fe8-Fe5-Fe6   | 61.64(11) |
| Fe7-Mo4-Fe6  | 82.41(10) | Fe8-Fe5-Fe7   | 59.26(10) |
| C4B-Mo4-Mo3  | 156.1(11) | C9B-Fe5-Mo4   | 64.2(4)   |
| C4B-Mo4-Fe5  | 108.0(12) | C9B-Fe5-Fe6   | 109.9(5)  |
| C4B-Mo4-Fe6  | 147.8(11) | C9B-Fe5-Fe7   | 102.4(4)  |
| C4B-Mo4-Fe7  | 112.1(12) | C9B-Fe5-Fe8   | 158.1(4)  |
| C4B-Mo4-C8B  | 78.7(12)  | C9B-Fe5-C19B  | 111.9(7)  |
| C4B-Mo4-C19B | 145.5(13) | C12B-Fe5-Mo4  | 116.8(4)  |
| C5B-Mo4-Mo3  | 72.9(8)   | C12B-Fe5-Fe6  | 74.2(4)   |
| C5B-Mo4-Fe5  | 156.9(8)  | C12B-Fe5-Fe7  | 161.1(4)  |
| C5B-Mo4-Fe6  | 116.5(8)  | C12B-Fe5-Fe8  | 103.7(5)  |
| C5B-Mo4-Fe7  | 102.5(8)  | C12B-Fe5-C9B  | 92.2(6)   |
| C5B-Mo4-C4B  | 89.2(14)  | C12B-Fe5-C13B | 92.8(12)  |
| C5B-Mo4-C8B  | 79.4(9)   | C12B-Fe5-C19B | 117.9(6)  |
| C5B-Mo4-C19B | 116.4(9)  | C13B-Fe5-Mo4  | 139.0(13) |
| C6B-Mo4-Mo3  | 96.6(7)   | C13B-Fe5-Fe6  | 157.5(13) |
| C6B-Mo4-Fe5  | 114.3(7)  | C13B-Fe5-Fe7  | 99.5(11)  |
| C6B-Mo4-Fe6  | 73.4(7)   | C13B-Fe5-Fe8  | 105.4(13) |
| C6B-Mo4-Fe7  | 152.8(7)  | C13B-Fe5-C9B  | 88.5(14)  |
| C6B-Mo4-C4B  | 95.0(14)  | C13B-Fe5-C19B | 141.0(12) |
| C6B-Mo4-C5B  | 78.2(10)  | C19B-Fe5-Mo4  | 47.8(5)   |
| C6B-Mo4-C8B  | 156.9(8)  | C19B-Fe5-Fe6  | 44.2(4)   |
| C6B-Mo4-C19B | 111.9(8)  | C19B-Fe5-Fe7  | 45.2(4)   |
| C8B-Mo4-Mo3  | 82.5(3)   | C19B-Fe5-Fe8  | 47.2(5)   |
| C8B-Mo4-Fe5  | 88.8(4)   | Mo3-Fe6-Mo4   | 64.78(8)  |
| C8B-Mo4-Fe6  | 122.8(3)  | Fe5-Fe6-Mo3   | 95.97(8)  |
| C8B-Mo4-Fe7  | 40.8(3)   | Fe5-Fe6-Mo4   | 62.32(8)  |
| C19B-Mo4-Mo3 | 44.2(5)   | Fe5-Fe6-Fe8   | 57.32(10) |
| C19B-Mo4-Fe5 | 41.9(5)   | Fe8-Fe6-Mo3   | 64.93(8)  |
| C19B-Mo4-Fe6 | 39.4(4)   | Fe8-Fe6-Mo4   | 91.93(11) |
| C19B-Mo4-Fe7 | 43.0(4)   | C7B-Fe6-Mo3   | 63.8(5)   |
| C19B-Mo4-C8B | 83.5(5)   | C7B-Fe6-Mo4   | 100.9(5)  |
| Fe6-Fe5-Mo4  | 63.12(9)  | C7B-Fe6-Fe5   | 158.8(5)  |
| Fe6-Fe5-Fe7  | 89.37(8)  | C7B-Fe6-Fe8   | 114.1(6)  |
| Fe7-Fe5-Mo4  | 61.07(8)  | C7B-Fe6-C19B  | 112.9(7)  |
| Fe8-Fe5-Mo4  | 94.86(10) | C10B-Fe6-Mo3  | 141.9(10) |

|               |           |               |           |
|---------------|-----------|---------------|-----------|
| C10B-Fe6-Mo4  | 93.9(8)   | C15B-Fe7-Fe5  | 82.9(4)   |
| C10B-Fe6-Fe5  | 101.3(8)  | C15B-Fe7-Fe8  | 105.7(4)  |
| C10B-Fe6-Fe8  | 151.3(9)  | C15B-Fe7-C8B  | 92.7(6)   |
| C10B-Fe6-C7B  | 92.3(10)  | C15B-Fe7-C19B | 126.9(6)  |
| C10B-Fe6-C11B | 93.5(11)  | C19B-Fe7-Mo3  | 47.1(5)   |
| C10B-Fe6-C19B | 135.5(9)  | C19B-Fe7-Mo4  | 48.2(5)   |
| C11B-Fe6-Mo3  | 116.3(6)  | C19B-Fe7-Fe5  | 44.4(5)   |
| C11B-Fe6-Mo4  | 162.7(6)  | C19B-Fe7-Fe8  | 45.6(5)   |
| C11B-Fe6-Fe5  | 100.9(6)  | Fe5-Fe8-Mo3   | 94.99(13) |
| C11B-Fe6-Fe8  | 74.3(6)   | Fe5-Fe8-Fe6   | 61.04(11) |
| C11B-Fe6-C7B  | 94.3(8)   | Fe5-Fe8-Fe7   | 64.15(11) |
| C11B-Fe6-C19B | 118.9(8)  | Fe6-Fe8-Mo3   | 59.83(9)  |
| C19B-Fe6-Mo3  | 49.5(5)   | Fe7-Fe8-Mo3   | 62.83(9)  |
| C19B-Fe6-Mo4  | 47.2(5)   | Fe7-Fe8-Fe6   | 91.74(14) |
| C19B-Fe6-Fe5  | 46.5(5)   | C16B-Fe8-Mo3  | 106.5(7)  |
| C19B-Fe6-Fe8  | 44.8(5)   | C16B-Fe8-Fe5  | 106.8(7)  |
| Mo4-Fe7-Mo3   | 63.95(7)  | C16B-Fe8-Fe6  | 158.2(8)  |
| Fe5-Fe7-Mo3   | 91.43(7)  | C16B-Fe8-Fe7  | 66.5(8)   |
| Fe5-Fe7-Mo4   | 61.75(7)  | C16B-Fe8-C19B | 114.4(9)  |
| Fe8-Fe7-Mo3   | 63.85(8)  | C17B-Fe8-Mo3  | 162.5(8)  |
| Fe8-Fe7-Mo4   | 93.67(10) | C17B-Fe8-Fe5  | 79.2(8)   |
| Fe8-Fe7-Fe5   | 56.59(10) | C17B-Fe8-Fe6  | 103.4(8)  |
| C8B-Fe7-Mo3   | 97.4(4)   | C17B-Fe8-Fe7  | 126.7(9)  |
| C8B-Fe7-Mo4   | 58.6(5)   | C17B-Fe8-C16B | 91.0(11)  |
| C8B-Fe7-Fe5   | 106.6(5)  | C17B-Fe8-C19B | 125.9(10) |
| C8B-Fe7-Fe8   | 152.0(5)  | C18B-Fe8-Mo3  | 84.0(11)  |
| C8B-Fe7-C19B  | 106.4(7)  | C18B-Fe8-Fe5  | 160.2(10) |
| C14B-Fe7-Mo3  | 101.2(4)  | C18B-Fe8-Fe6  | 102.3(11) |
| C14B-Fe7-Mo4  | 137.7(5)  | C18B-Fe8-Fe7  | 130.7(10) |
| C14B-Fe7-Fe5  | 160.2(5)  | C18B-Fe8-C16B | 92.3(12)  |
| C14B-Fe7-Fe8  | 115.9(5)  | C18B-Fe8-C17B | 95.9(14)  |
| C14B-Fe7-C8B  | 87.0(7)   | C18B-Fe8-C19B | 127.6(12) |
| C14B-Fe7-C15B | 82.1(6)   | C19B-Fe8-Mo3  | 46.4(5)   |
| C14B-Fe7-C19B | 146.1(7)  | C19B-Fe8-Fe5  | 48.6(5)   |
| C15B-Fe7-Mo3  | 169.5(4)  | C19B-Fe8-Fe6  | 43.8(5)   |
| C15B-Fe7-Mo4  | 120.0(5)  | C19B-Fe8-Fe7  | 47.9(5)   |

|               |           |              |            |
|---------------|-----------|--------------|------------|
| C15B-O15B-K2  | 109.5(11) | Fe8-C19B-Mo4 | 172.8(9)   |
| C16B-O16B-K2  | 134.8(18) | Fe8-C19B-Fe5 | 84.2(7)    |
| O1B-C1B-Mo3   | 171.8(15) | Fe8-C19B-Fe7 | 86.5(7)    |
| O2B-C2B-Mo3   | 176(3)    | O16A-K1-O15A | 73.3(3)    |
| O3B-C3B-Mo3   | 170.6(15) | O1-K1-O15A   | 145.99(14) |
| O4B-C4B-Mo4   | 175(3)    | O1-K1-O16A   | 74.3(3)    |
| O5B-C5B-Mo4   | 167(3)    | O2-K1-O15A   | 119.54(14) |
| O6B-C6B-Mo4   | 165(2)    | O2-K1-O16A   | 75.4(3)    |
| Fe6-C7B-Mo3   | 77.2(5)   | O2-K1-O1     | 60.51(9)   |
| O7B-C7B-Mo3   | 125.5(11) | O2-K1-O3     | 61.01(9)   |
| O7B-C7B-Fe6   | 156.9(14) | O2-K1-O4     | 114.90(10) |
| Fe7-C8B-Mo4   | 80.7(5)   | O2-K1-O5     | 159.66(10) |
| O8B-C8B-Mo4   | 128.9(12) | O2-K1-O6     | 114.80(10) |
| O8B-C8B-Fe7   | 150.3(14) | O3-K1-O15A   | 73.95(14)  |
| O9B-C9B-Fe5   | 155.1(11) | O3-K1-O16A   | 98.2(3)    |
| O10B-C10B-Fe6 | 175(2)    | O3-K1-O1     | 121.02(10) |
| O11B-C11B-Fe6 | 173.8(16) | O3-K1-O4     | 60.44(9)   |
| O12B-C12B-Fe5 | 170.2(11) | O3-K1-O6     | 173.29(10) |
| O13B-C13B-Fe5 | 178(3)    | O4-K1-O15A   | 66.37(14)  |
| O14B-C14B-Fe7 | 163.2(13) | O4-K1-O16A   | 138.1(3)   |
| O15B-C15B-Fe7 | 173.7(13) | O4-K1-O1     | 147.30(10) |
| O16B-C16B-Fe8 | 165(2)    | O5-K1-O15A   | 78.23(14)  |
| O17B-C17B-Fe8 | 176(3)    | O5-K1-O16A   | 121.9(3)   |
| O18B-C18B-Fe8 | 168(3)    | O5-K1-O1     | 111.16(10) |
| Mo3-C19B-Mo4  | 91.6(7)   | O5-K1-O3     | 120.94(10) |
| Fe5-C19B-Mo3  | 177.7(9)  | O5-K1-O4     | 60.81(10)  |
| Fe5-C19B-Mo4  | 90.4(6)   | O5-K1-O6     | 60.88(10)  |
| Fe5-C19B-Fe7  | 90.4(6)   | O6-K1-O15A   | 112.64(14) |
| Fe6-C19B-Mo3  | 89.3(6)   | O6-K1-O16A   | 85.3(3)    |
| Fe6-C19B-Mo4  | 93.3(7)   | O6-K1-O1     | 54.33(9)   |
| Fe6-C19B-Fe5  | 89.3(7)   | O6-K1-O4     | 120.20(10) |
| Fe6-C19B-Fe7  | 177.8(10) | C1-O1-K1     | 119.4(2)   |
| Fe6-C19B-Fe8  | 91.3(7)   | C1-O1-C7     | 116.5(3)   |
| Fe7-C19B-Mo3  | 90.9(7)   | C7-O1-K1     | 115.8(2)   |
| Fe7-C19B-Mo4  | 88.8(6)   | C8-O2-K1     | 112.3(2)   |
| Fe8-C19B-Mo3  | 94.0(7)   | C8-O2-C9     | 112.8(3)   |

|            |          |               |          |
|------------|----------|---------------|----------|
| C9-O2-K1   | 111.7(2) | C8-C7-H7B     | 110.2    |
| C10-O3-K1  | 116.9(2) | O2-C8-C7      | 108.9(3) |
| C11-O3-K1  | 118.1(2) | O2-C8-H8A     | 109.9    |
| C11-O3-C10 | 111.4(3) | O2-C8-H8B     | 109.9    |
| C12-O4-K1  | 112.3(2) | C7-C8-H8A     | 109.9    |
| C13-O4-K1  | 112.3(3) | C7-C8-H8B     | 109.9    |
| C13-O4-C12 | 111.6(3) | H8A-C8-H8B    | 108.3    |
| C14-O5-K1  | 117.6(3) | O2-C9-H9A     | 110.2    |
| C15-O5-K1  | 119.8(3) | O2-C9-H9B     | 110.2    |
| C15-O5-C14 | 113.8(3) | O2-C9-C10     | 107.8(3) |
| C6-O6-K1   | 120.5(3) | H9A-C9-H9B    | 108.5    |
| C6-O6-C16  | 120.3(4) | C10-C9-H9A    | 110.2    |
| C16-O6-K1  | 109.9(3) | C10-C9-H9B    | 110.2    |
| O1-C1-C2   | 124.2(4) | O3-C10-C9     | 108.6(4) |
| O1-C1-C6   | 115.4(4) | O3-C10-H10A   | 110.0    |
| C2-C1-C6   | 120.3(4) | O3-C10-H10B   | 110.0    |
| C1-C2-H2   | 120.3    | C9-C10-H10A   | 110.0    |
| C1-C2-C3   | 119.4(5) | C9-C10-H10B   | 110.0    |
| C3-C2-H2   | 120.3    | H10A-C10-H10B | 108.4    |
| C2-C3-H3   | 119.9    | O3-C11-H11A   | 109.9    |
| C4-C3-C2   | 120.2(4) | O3-C11-H11B   | 109.9    |
| C4-C3-H3   | 119.9    | O3-C11-C12    | 108.9(3) |
| C3-C4-H4   | 119.9    | H11A-C11-H11B | 108.3    |
| C3-C4-C5   | 120.3(4) | C12-C11-H11A  | 109.9    |
| C5-C4-H4   | 119.9    | C12-C11-H11B  | 109.9    |
| C4-C5-H5   | 119.8    | O4-C12-C11    | 108.3(3) |
| C6-C5-C4   | 120.3(5) | O4-C12-H12A   | 110.0    |
| C6-C5-H5   | 119.8    | O4-C12-H12B   | 110.0    |
| O6-C6-C1   | 114.6(4) | C11-C12-H12A  | 110.0    |
| O6-C6-C5   | 125.9(5) | C11-C12-H12B  | 110.0    |
| C5-C6-C1   | 119.5(4) | H12A-C12-H12B | 108.4    |
| O1-C7-H7A  | 110.2    | O4-C13-H13A   | 110.1    |
| O1-C7-H7B  | 110.2    | O4-C13-H13B   | 110.1    |
| O1-C7-C8   | 107.7(4) | O4-C13-C14    | 108.2(4) |
| H7A-C7-H7B | 108.5    | H13A-C13-H13B | 108.4    |
| C8-C7-H7A  | 110.2    | C14-C13-H13A  | 110.1    |

|               |            |             |            |
|---------------|------------|-------------|------------|
| C14-C13-H13B  | 110.1      | O10-K2-O15B | 73.08(19)  |
| O5-C14-C13    | 109.1(4)   | O10-K2-O7   | 173.81(10) |
| O5-C14-H14A   | 109.9      | O10-K2-O9   | 60.28(9)   |
| O5-C14-H14B   | 109.9      | O10-K2-O12  | 121.39(10) |
| C13-C14-H14A  | 109.9      | O11-K2-O15B | 119.89(18) |
| C13-C14-H14B  | 109.9      | O11-K2-O7   | 115.04(10) |
| H14A-C14-H14B | 108.3      | O11-K2-O8   | 159.49(10) |
| O5-C15-H15A   | 110.3      | O11-K2-O9   | 114.99(10) |
| O5-C15-H15B   | 110.3      | O11-K2-O10  | 61.12(9)   |
| O5-C15-C16    | 106.9(4)   | O11-K2-O12  | 60.68(9)   |
| H15A-C15-H15B | 108.6      | O12-K2-O15B | 146.90(17) |
| C16-C15-H15A  | 110.3      | C17-O7-K2   | 120.0(3)   |
| C16-C15-H15B  | 110.3      | C17-O7-C23  | 119.7(3)   |
| O6-C16-C15    | 110.6(4)   | C23-O7-K2   | 110.3(2)   |
| O6-C16-H16A   | 109.5      | C24-O8-K2   | 119.5(3)   |
| O6-C16-H16B   | 109.5      | C25-O8-K2   | 119.3(3)   |
| C15-C16-H16A  | 109.5      | C25-O8-C24  | 113.7(4)   |
| C15-C16-H16B  | 109.5      | C26-O9-K2   | 111.7(3)   |
| H16A-C16-H16B | 108.1      | C27-O9-K2   | 112.0(2)   |
| O16B-K2-O15B  | 70.3(5)    | C27-O9-C26  | 112.2(3)   |
| O16B-K2-O7    | 85.1(6)    | C28-O10-K2  | 118.3(2)   |
| O16B-K2-O8    | 118.3(5)   | C29-O10-K2  | 116.7(2)   |
| O16B-K2-O9    | 133.8(6)   | C29-O10-C28 | 112.4(3)   |
| O16B-K2-O10   | 98.6(6)    | C30-O11-K2  | 111.0(3)   |
| O16B-K2-O11   | 80.0(5)    | C30-O11-C31 | 112.4(3)   |
| O16B-K2-O12   | 77.8(5)    | C31-O11-K2  | 111.7(2)   |
| O7-K2-O15B    | 112.96(19) | C22-O12-K2  | 119.4(2)   |
| O7-K2-O9      | 120.35(10) | C22-O12-C32 | 116.9(3)   |
| O7-K2-O12     | 54.38(9)   | C32-O12-K2  | 115.2(2)   |
| O8-K2-O15B    | 77.54(18)  | O7-C17-C18  | 125.7(4)   |
| O8-K2-O7      | 61.21(10)  | O7-C17-C22  | 114.8(4)   |
| O8-K2-O9      | 60.40(10)  | C18-C17-C22 | 119.4(4)   |
| O8-K2-O10     | 120.42(10) | C17-C18-H18 | 120.2      |
| O8-K2-O12     | 111.54(10) | C19-C18-C17 | 119.6(5)   |
| O9-K2-O15B    | 64.46(17)  | C19-C18-H18 | 120.2      |
| O9-K2-O12     | 148.28(9)  | C18-C19-H19 | 119.5      |

|               |          |               |          |
|---------------|----------|---------------|----------|
| C20-C19-C18   | 121.1(4) | O9-C27-H27B   | 110.0    |
| C20-C19-H19   | 119.5    | O9-C27-C28    | 108.7(4) |
| C19-C20-H20   | 120.0    | H27A-C27-H27B | 108.3    |
| C19-C20-C21   | 119.9(4) | C28-C27-H27A  | 110.0    |
| C21-C20-H20   | 120.0    | C28-C27-H27B  | 110.0    |
| C20-C21-H21   | 120.0    | O10-C28-C27   | 109.1(4) |
| C22-C21-C20   | 120.0(4) | O10-C28-H28A  | 109.9    |
| C22-C21-H21   | 120.0    | O10-C28-H28B  | 109.9    |
| O12-C22-C17   | 115.3(4) | C27-C28-H28A  | 109.9    |
| O12-C22-C21   | 124.8(4) | C27-C28-H28B  | 109.9    |
| C21-C22-C17   | 119.9(4) | H28A-C28-H28B | 108.3    |
| O7-C23-H23A   | 109.4    | O10-C29-H29A  | 109.9    |
| O7-C23-H23B   | 109.4    | O10-C29-H29B  | 109.9    |
| O7-C23-C24    | 111.4(4) | O10-C29-C30   | 108.9(4) |
| H23A-C23-H23B | 108.0    | H29A-C29-H29B | 108.3    |
| C24-C23-H23A  | 109.4    | C30-C29-H29A  | 109.9    |
| C24-C23-H23B  | 109.4    | C30-C29-H29B  | 109.9    |
| O8-C24-C23    | 107.1(4) | O11-C30-C29   | 107.7(3) |
| O8-C24-H24A   | 110.3    | O11-C30-H30A  | 110.2    |
| O8-C24-H24B   | 110.3    | O11-C30-H30B  | 110.2    |
| C23-C24-H24A  | 110.3    | C29-C30-H30A  | 110.2    |
| C23-C24-H24B  | 110.3    | C29-C30-H30B  | 110.2    |
| H24A-C24-H24B | 108.5    | H30A-C30-H30B | 108.5    |
| O8-C25-H25A   | 110.1    | O11-C31-H31A  | 110.0    |
| O8-C25-H25B   | 110.1    | O11-C31-H31B  | 110.0    |
| O8-C25-C26    | 108.2(4) | O11-C31-C32   | 108.5(3) |
| H25A-C25-H25B | 108.4    | H31A-C31-H31B | 108.4    |
| C26-C25-H25A  | 110.1    | C32-C31-H31A  | 110.0    |
| C26-C25-H25B  | 110.1    | C32-C31-H31B  | 110.0    |
| O9-C26-C25    | 109.3(4) | O12-C32-C31   | 108.3(3) |
| O9-C26-H26A   | 109.8    | O12-C32-H32A  | 110.0    |
| O9-C26-H26B   | 109.8    | O12-C32-H32B  | 110.0    |
| C25-C26-H26A  | 109.8    | C31-C32-H32A  | 110.0    |
| C25-C26-H26B  | 109.8    | C31-C32-H32B  | 110.0    |
| H26A-C26-H26B | 108.3    | H32A-C32-H32B | 108.4    |
| O9-C27-H27A   | 110.0    |               |          |

**Table S10.** Anisotropic displacement parameters ( $\text{\AA}^2 \times 10^3$ ) for **2**. The anisotropic displacement factor exponent takes the form:  $-2p^2[ h^2 a^*U^{11} + \dots + 2 h k a^* b^* U^{12} ]$

|      | U11   | U22   | U33   | U23    | U13    | U12    |
|------|-------|-------|-------|--------|--------|--------|
| Mo1  | 13(1) | 18(1) | 13(1) | 0(1)   | 2(1)   | -3(1)  |
| Mo2  | 13(1) | 15(1) | 14(1) | 0(1)   | 0(1)   | 0(1)   |
| Fe1  | 8(1)  | 10(1) | 10(1) | -5(1)  | 0(1)   | 2(1)   |
| Fe2  | 21(1) | 13(1) | 14(1) | 1(1)   | -3(1)  | 4(1)   |
| Fe3  | 19(1) | 12(1) | 8(1)  | 2(1)   | 0(1)   | 3(1)   |
| Fe4  | 18(1) | 20(1) | 15(1) | -4(1)  | 1(1)   | 4(1)   |
| O1A  | 20(3) | 51(4) | 27(3) | 6(3)   | 1(2)   | 12(3)  |
| O2A  | 23(3) | 39(3) | 47(3) | -21(3) | 8(2)   | -6(2)  |
| O3A  | 36(5) | 32(5) | 14(3) | -5(3)  | 5(3)   | 13(4)  |
| O4A  | 24(6) | 28(5) | 37(5) | -8(4)  | 10(4)  | 1(4)   |
| O5A  | 24(5) | 10(4) | 25(4) | 0(4)   | -1(3)  | -8(4)  |
| O6A  | 33(6) | 36(6) | 18(3) | 3(3)   | -5(3)  | -4(4)  |
| O7A  | 25(3) | 28(3) | 34(3) | 5(3)   | 3(3)   | 8(2)   |
| O8A  | 37(4) | 25(4) | 22(3) | -7(3)  | -7(3)  | 12(3)  |
| O9A  | 16(3) | 47(4) | 30(3) | -23(3) | -6(2)  | -3(3)  |
| O10A | 34(4) | 43(4) | 37(4) | 2(3)   | 2(3)   | -7(3)  |
| O11A | 34(3) | 19(3) | 21(3) | -2(2)  | 3(2)   | 6(3)   |
| O12A | 19(3) | 26(3) | 29(3) | 10(2)  | 3(2)   | 4(2)   |
| O13A | 16(4) | 36(6) | 41(5) | 16(4)  | 13(3)  | -3(3)  |
| O14A | 15(3) | 33(4) | 29(4) | 8(3)   | 0(3)   | -1(3)  |
| O15A | 24(3) | 35(3) | 28(3) | 13(3)  | 8(3)   | 7(2)   |
| O16A | 28(5) | 28(4) | 21(4) | 0(3)   | -2(3)  | 2(4)   |
| O17A | 17(4) | 41(4) | 17(4) | -6(4)  | 5(3)   | -3(3)  |
| O18A | 25(4) | 27(6) | 33(4) | -4(5)  | -1(2)  | -14(5) |
| C1A  | 30(4) | 40(4) | 13(3) | 0(3)   | 0(3)   | 4(3)   |
| C2A  | 15(3) | 30(3) | 17(3) | -10(3) | 1(2)   | 2(3)   |
| C3A  | 17(6) | 20(5) | 23(4) | 0(3)   | -10(4) | 3(4)   |
| C4A  | 20(5) | 23(5) | 23(6) | 0(4)   | 0(4)   | 1(3)   |
| C5A  | 11(4) | 10(5) | 14(4) | 0(4)   | -4(3)  | -2(4)  |
| C6A  | 15(4) | 15(4) | 19(3) | -2(3)  | -1(3)  | -1(3)  |
| C7A  | 17(3) | 20(3) | 35(4) | -2(3)  | 13(3)  | 4(3)   |

|      |       |        |        |        |        |        |
|------|-------|--------|--------|--------|--------|--------|
| C8A  | 20(3) | 15(3)  | 17(3)  | -2(3)  | -4(3)  | 0(3)   |
| C9A  | 21(3) | 26(3)  | 24(3)  | -10(3) | -7(3)  | 4(3)   |
| C11A | 27(4) | 17(4)  | 13(3)  | 4(3)   | 1(3)   | 3(4)   |
| C12A | 20(3) | 15(3)  | 11(2)  | 8(2)   | -1(2)  | -2(2)  |
| C14A | 21(4) | 18(5)  | 23(4)  | -1(4)  | 10(3)  | -4(4)  |
| C15A | 12(3) | 20(3)  | 22(3)  | -3(3)  | -2(2)  | 7(2)   |
| C16A | 32(6) | 26(6)  | 33(4)  | -3(4)  | 7(4)   | 1(4)   |
| C17A | 11(4) | 21(4)  | 18(5)  | -5(4)  | -2(4)  | -1(3)  |
| C18A | 16(5) | 20(6)  | 18(5)  | -5(5)  | -2(4)  | 4(4)   |
| C19A | 10(3) | 13(3)  | 10(3)  | 4(3)   | 4(2)   | 5(3)   |
| Mo3  | 19(1) | 37(1)  | 26(1)  | 10(1)  | 2(1)   | -5(1)  |
| Mo4  | 25(1) | 22(1)  | 26(1)  | 4(1)   | -2(1)  | 1(1)   |
| Fe5  | 15(1) | 19(1)  | 22(1)  | 2(1)   | 5(1)   | 2(1)   |
| Fe6  | 32(1) | 26(1)  | 34(1)  | 16(1)  | -7(1)  | 4(1)   |
| Fe7  | 31(1) | 21(1)  | 21(1)  | 11(1)  | -1(1)  | 4(1)   |
| Fe8  | 17(2) | 26(1)  | 24(2)  | 5(1)   | 4(1)   | 4(1)   |
| O1B  | 33(5) | 61(6)  | 62(6)  | -32(5) | -4(4)  | 1(4)   |
| O2B  | 29(8) | 36(8)  | 38(6)  | 11(5)  | 12(5)  | -3(5)  |
| O3B  | 54(7) | 76(7)  | 44(6)  | 23(6)  | 11(5)  | 34(6)  |
| O5B  | 34(7) | 47(8)  | 40(10) | -9(7)  | 20(6)  | -15(6) |
| O6B  | 42(9) | 54(9)  | 20(5)  | 11(5)  | -9(6)  | 1(7)   |
| O7B  | 37(5) | 31(5)  | 53(6)  | 12(5)  | 9(5)   | 7(4)   |
| O8B  | 42(6) | 26(6)  | 39(6)  | 5(6)   | -7(5)  | 5(6)   |
| O9B  | 29(5) | 72(7)  | 37(5)  | -17(5) | 6(4)   | -5(4)  |
| O10B | 38(7) | 40(6)  | 33(7)  | 4(5)   | -1(5)  | -13(5) |
| O11B | 54(7) | 25(5)  | 41(6)  | 10(4)  | -11(5) | 0(5)   |
| O12B | 27(4) | 52(6)  | 41(5)  | 23(4)  | 0(4)   | 4(4)   |
| O13B | 40(7) | 48(9)  | 46(9)  | 12(7)  | 8(6)   | 9(7)   |
| O15B | 39(5) | 38(4)  | 39(4)  | 15(4)  | 13(4)  | 4(4)   |
| O16B | 37(7) | 32(6)  | 25(5)  | 3(4)   | -2(5)  | 1(5)   |
| O17B | 16(6) | 40(10) | 47(8)  | -12(6) | 4(5)   | 0(6)   |
| O18B | 28(6) | 31(10) | 34(6)  | 2(8)   | 6(4)   | -17(8) |
| C1B  | 38(6) | 50(6)  | 42(6)  | -10(5) | 16(5)  | 2(5)   |
| C2B  | 34(8) | 39(8)  | 36(8)  | -2(5)  | -5(5)  | 4(5)   |
| C3B  | 33(5) | 45(5)  | 30(5)  | 10(4)  | 1(4)   | 8(4)   |
| C4B  | 12(7) | 18(7)  | 19(7)  | 3(6)   | 2(5)   | 4(6)   |

|      |       |       |       |       |       |       |
|------|-------|-------|-------|-------|-------|-------|
| C5B  | 26(7) | 40(8) | 32(8) | 1(6)  | 1(5)  | -1(5) |
| C6B  | 22(6) | 17(6) | 26(5) | 8(4)  | 1(4)  | 5(5)  |
| C7B  | 32(5) | 34(5) | 53(6) | 3(5)  | 4(5)  | 1(4)  |
| C8B  | 31(6) | 30(6) | 33(5) | -4(4) | 2(5)  | -4(5) |
| C9B  | 32(5) | 41(5) | 34(5) | -7(4) | -9(4) | 8(4)  |
| C10B | 29(7) | 17(7) | 15(5) | 3(4)  | 10(4) | -2(5) |
| C11B | 38(6) | 28(6) | 33(6) | 3(5)  | -6(5) | -6(6) |
| C12B | 27(5) | 29(5) | 34(5) | 5(4)  | -3(4) | -7(4) |
| C13B | 10(7) | 30(8) | 28(8) | -5(5) | 4(6)  | 7(5)  |
| C15B | 28(5) | 32(5) | 29(5) | 0(4)  | -1(4) | 8(4)  |
| C16B | 33(7) | 36(7) | 35(6) | 7(5)  | 0(5)  | 1(5)  |
| C17B | 19(7) | 24(7) | 19(7) | 5(5)  | -2(5) | -6(5) |
| C18B | 27(7) | 33(9) | 27(7) | -3(6) | 3(5)  | 3(6)  |
| C19B | 27(6) | 19(5) | 23(5) | 0(4)  | 2(4)  | 5(4)  |
| K1   | 18(1) | 19(1) | 28(1) | -1(1) | 1(1)  | -2(1) |
| O1   | 16(2) | 22(1) | 22(1) | -5(1) | 0(1)  | -1(1) |
| O2   | 17(1) | 19(1) | 24(1) | -1(1) | 3(1)  | -1(1) |
| O3   | 22(2) | 19(1) | 21(1) | 3(1)  | -1(1) | -1(1) |
| O4   | 22(2) | 22(1) | 26(1) | -4(1) | 2(1)  | -5(1) |
| O5   | 19(2) | 22(2) | 42(2) | -2(1) | 3(1)  | -2(1) |
| O6   | 18(2) | 26(2) | 28(2) | -7(1) | 0(1)  | -1(1) |
| C1   | 25(2) | 15(2) | 19(2) | 2(1)  | 4(2)  | -3(2) |
| C2   | 33(2) | 21(2) | 17(2) | -1(2) | 2(2)  | -4(2) |
| C3   | 53(3) | 24(2) | 16(2) | 0(2)  | 6(2)  | -1(2) |
| C4   | 45(3) | 30(2) | 28(2) | 0(2)  | 16(2) | 4(2)  |
| C5   | 28(2) | 30(2) | 31(2) | 3(2)  | 10(2) | 1(2)  |
| C6   | 26(2) | 17(2) | 25(2) | 1(2)  | 6(2)  | -1(2) |
| C7   | 18(2) | 20(2) | 26(2) | 0(2)  | -4(2) | -3(2) |
| C8   | 16(2) | 23(2) | 31(2) | 1(2)  | 1(2)  | -1(2) |
| C9   | 20(2) | 28(2) | 25(2) | -3(2) | 4(2)  | 0(2)  |
| C10  | 20(2) | 26(2) | 23(2) | -2(2) | 5(2)  | 3(2)  |
| C11  | 31(2) | 15(2) | 24(2) | 0(2)  | 3(2)  | 0(2)  |
| C12  | 29(2) | 19(2) | 22(2) | -6(2) | 2(2)  | -1(2) |
| C13  | 24(2) | 28(2) | 38(2) | -6(2) | 1(2)  | -7(2) |
| C14  | 19(2) | 29(2) | 42(3) | -3(2) | 4(2)  | -8(2) |
| C15  | 20(2) | 27(2) | 41(2) | -2(2) | 4(2)  | -2(2) |

|     |       |       |       |       |       |       |
|-----|-------|-------|-------|-------|-------|-------|
| C16 | 21(2) | 29(2) | 36(2) | -1(2) | -3(2) | 2(2)  |
| K2  | 17(1) | 20(1) | 31(1) | -1(1) | 1(1)  | -1(1) |
| O7  | 18(2) | 23(2) | 31(2) | -5(1) | -2(1) | -2(1) |
| O8  | 24(2) | 22(2) | 35(2) | -1(1) | 6(1)  | -3(1) |
| O9  | 22(2) | 22(1) | 23(1) | -7(1) | 4(1)  | -2(1) |
| O10 | 23(2) | 16(1) | 21(1) | 3(1)  | 2(1)  | -1(1) |
| O11 | 17(1) | 19(1) | 26(1) | -1(1) | 4(1)  | -1(1) |
| O12 | 16(2) | 22(1) | 22(1) | -3(1) | -2(1) | -2(1) |
| C17 | 20(2) | 18(2) | 21(2) | 2(2)  | 2(2)  | -4(2) |
| C18 | 26(2) | 27(2) | 29(2) | -1(2) | 10(2) | 0(2)  |
| C19 | 41(3) | 29(2) | 28(2) | 0(2)  | 16(2) | 4(2)  |
| C20 | 45(3) | 25(2) | 18(2) | -2(2) | 8(2)  | -3(2) |
| C21 | 31(2) | 23(2) | 19(2) | 4(2)  | 0(2)  | -6(2) |
| C22 | 22(2) | 16(2) | 20(2) | 1(1)  | 5(2)  | -2(2) |
| C23 | 18(2) | 28(2) | 33(2) | -4(2) | -5(2) | -2(2) |
| C24 | 18(2) | 33(2) | 37(2) | -3(2) | 1(2)  | 1(2)  |
| C25 | 22(2) | 26(2) | 46(3) | -5(2) | 6(2)  | -6(2) |
| C26 | 24(2) | 22(2) | 36(2) | -6(2) | 2(2)  | -8(2) |
| C27 | 32(3) | 15(2) | 28(2) | -4(2) | 8(2)  | -5(2) |
| C28 | 29(2) | 16(2) | 28(2) | 2(2)  | 8(2)  | 1(2)  |
| C29 | 21(2) | 25(2) | 24(2) | -2(2) | 3(2)  | 6(2)  |
| C30 | 19(2) | 26(2) | 26(2) | -4(2) | 8(2)  | -2(2) |
| C31 | 19(2) | 18(2) | 28(2) | 3(2)  | -2(2) | -5(2) |
| C32 | 18(2) | 22(2) | 23(2) | -1(2) | -4(2) | -2(2) |

---

**Table S11.** Hydrogen coordinates ( $\times 10^4 \text{ \AA}$ ) and isotropic displacement parameters ( $\text{\AA}^2 \times 10^3$ ) for **2**.

|      | x    | y     | z     | U(eq) |
|------|------|-------|-------|-------|
| H2   | 2898 | 5120  | 8889  | 29    |
| H3   | 3845 | 3846  | 8257  | 37    |
| H4   | 5179 | 4038  | 8570  | 40    |
| H5   | 5588 | 5458  | 9522  | 35    |
| H7A  | 2165 | 5719  | 9737  | 26    |
| H7B  | 2286 | 7310  | 9350  | 26    |
| H8A  | 1347 | 7549  | 10213 | 28    |
| H8B  | 2023 | 7084  | 10771 | 28    |
| H9A  | 1777 | 9748  | 11255 | 29    |
| H9B  | 1137 | 9925  | 10634 | 29    |
| H10A | 1893 | 11957 | 10197 | 28    |
| H10B | 1608 | 12353 | 10943 | 28    |
| H11A | 2731 | 14083 | 11012 | 28    |
| H11B | 3018 | 13504 | 10290 | 28    |
| H12A | 4102 | 14440 | 10983 | 28    |
| H12B | 3932 | 13148 | 11537 | 28    |
| H13A | 5229 | 12142 | 11371 | 36    |
| H13B | 5372 | 13418 | 10803 | 36    |
| H14A | 5494 | 11445 | 9978  | 36    |
| H14B | 6165 | 11302 | 10576 | 36    |
| H15A | 6334 | 8695  | 10502 | 35    |
| H15B | 5727 | 8580  | 9854  | 35    |
| H16A | 5786 | 6242  | 10475 | 35    |
| H16B | 5480 | 7125  | 11126 | 35    |
| H18  | 2184 | 9569  | 8215  | 32    |
| H19  | 2588 | 10965 | 9176  | 39    |
| H20  | 3911 | 11201 | 9489  | 35    |
| H21  | 4864 | 9944  | 8867  | 29    |
| H23A | 2311 | 7909  | 6609  | 32    |
| H23B | 2004 | 8787  | 7261  | 32    |

|      |      |      |      |    |
|------|------|------|------|----|
| H24A | 2042 | 6473 | 7874 | 35 |
| H24B | 1456 | 6350 | 7212 | 35 |
| H25A | 1627 | 3738 | 7125 | 38 |
| H25B | 2274 | 3558 | 7740 | 38 |
| H26A | 2424 | 1634 | 6909 | 33 |
| H26B | 2580 | 2929 | 6355 | 33 |
| H27A | 3884 | 1926 | 6198 | 30 |
| H27B | 3705 | 611  | 6738 | 30 |
| H28A | 4774 | 1501 | 7447 | 29 |
| H28B | 5071 | 966  | 6722 | 29 |
| H29A | 6190 | 2700 | 6825 | 35 |
| H29B | 5895 | 3081 | 7570 | 35 |
| H30A | 6659 | 5128 | 7144 | 28 |
| H30B | 6022 | 5322 | 6522 | 28 |
| H31A | 5773 | 7959 | 6996 | 26 |
| H31B | 6445 | 7520 | 7562 | 26 |
| H32A | 5488 | 7743 | 8411 | 25 |
| H32B | 5618 | 9334 | 8026 | 25 |

---

**Table 12.** Torsion angles (°) for **2**.

|                   |            |                    |            |
|-------------------|------------|--------------------|------------|
| Mo1-Fe2-C7A-O7A   | -175.9(19) | C7A-Fe2-C10A-O10A  | 99(4)      |
| Mo1-Fe2-C10A-O10A | 153(4)     | C8A-Fe3-C19A-Mo1   | 86.5(4)    |
| Mo1-Fe3-C19A-Mo2  | -95.2(4)   | C8A-Fe3-C19A-Mo2   | -8.7(4)    |
| Mo1-Fe3-C19A-Fe1  | 175.6(6)   | C8A-Fe3-C19A-Fe1   | -97.9(4)   |
| Mo1-Fe3-C19A-Fe4  | 93.8(4)    | C8A-Fe3-C19A-Fe4   | -179.7(3)  |
| Mo1-Fe4-C16A-O16A | -172(5)    | C10A-Fe2-C7A-Mo1   | 145.0(4)   |
| Mo2-Fe1-C9A-O9A   | 175.7(19)  | C10A-Fe2-C7A-O7A   | -30.9(18)  |
| Mo2-Fe2-C7A-Mo1   | 54.5(2)    | C11A-Fe2-C7A-Mo1   | -118.0(4)  |
| Mo2-Fe2-C7A-O7A   | -121.4(17) | C11A-Fe2-C7A-O7A   | 66.1(18)   |
| Mo2-Fe2-C10A-O10A | -162(4)    | C11A-Fe2-C10A-O10A | 1(4)       |
| Mo2-Fe3-C19A-Mo1  | 95.2(4)    | C12A-Fe1-C9A-Mo2   | -119.4(2)  |
| Mo2-Fe3-C19A-Fe1  | -89.3(4)   | C12A-Fe1-C9A-O9A   | 56.4(18)   |
| Mo2-Fe3-C19A-Fe4  | -171.0(4)  | C13A-Fe1-C9A-Mo2   | 146.6(6)   |
| Fe1-Fe2-C7A-Mo1   | 19.1(9)    | C13A-Fe1-C9A-O9A   | -37.6(19)  |
| Fe1-Fe2-C7A-O7A   | -156.9(13) | C14A-Fe3-C19A-Mo1  | -17.7(11)  |
| Fe1-Fe2-C10A-O10A | -101(4)    | C14A-Fe3-C19A-Mo2  | -112.9(10) |
| Fe1-Fe3-C19A-Mo1  | -175.6(6)  | C14A-Fe3-C19A-Fe1  | 157.9(9)   |
| Fe1-Fe3-C19A-Mo2  | 89.3(4)    | C14A-Fe3-C19A-Fe4  | 76.1(10)   |
| Fe1-Fe3-C19A-Fe4  | -81.8(3)   | C15A-Fe3-C19A-Mo1  | -168.7(4)  |
| Fe1-Fe4-C16A-O16A | 88(5)      | C15A-Fe3-C19A-Mo2  | 96.2(5)    |
| Fe2-Fe1-C9A-Mo2   | -46.1(2)   | C15A-Fe3-C19A-Fe1  | 6.9(7)     |
| Fe2-Fe1-C9A-O9A   | 129.6(18)  | C15A-Fe3-C19A-Fe4  | -74.9(6)   |
| Fe2-Fe4-C16A-O16A | 161(4)     | C17A-Fe4-C16A-O16A | 8(5)       |
| Fe3-Fe1-C9A-Mo2   | 48.47(19)  | C18A-Fe4-C16A-O16A | -89(5)     |
| Fe3-Fe1-C9A-O9A   | -135.8(18) | C19A-Fe1-C9A-Mo2   | 3.1(3)     |
| Fe3-Fe4-C16A-O16A | 133(5)     | C19A-Fe1-C9A-O9A   | 178.8(18)  |
| Fe4-Fe1-C9A-Mo2   | 16.0(8)    | C19A-Fe2-C7A-Mo1   | 8.4(4)     |
| Fe4-Fe1-C9A-O9A   | -168.3(13) | C19A-Fe2-C7A-O7A   | -167.5(17) |
| Fe4-Fe2-C7A-Mo1   | -41.1(3)   | C19A-Fe2-C10A-O10A | -139(4)    |
| Fe4-Fe2-C7A-O7A   | 143.0(17)  | C19A-Fe4-C16A-O16A | 143(5)     |
| Fe4-Fe2-C10A-O10A | -71(5)     | Mo3-Mo4-C6B-O6B    | 154(8)     |
| Fe4-Fe3-C19A-Mo1  | -93.8(4)   | Mo3-Fe6-C7B-O7B    | 171(4)     |
| Fe4-Fe3-C19A-Mo2  | 171.0(4)   | Mo3-Fe6-C19B-Mo4   | -91.5(7)   |
| Fe4-Fe3-C19A-Fe1  | 81.8(4)    | Mo3-Fe6-C19B-Fe5   | 178.1(10)  |

|                   |            |                   |            |
|-------------------|------------|-------------------|------------|
| Mo3-Fe6-C19B-Fe8  | 93.9(7)    | Fe6-Fe8-C19B-Fe5  | -89.2(7)   |
| Mo3-Fe7-C8B-Mo4   | -53.2(3)   | Fe6-Fe8-C19B-Fe7  | -179.9(10) |
| Mo3-Fe7-C8B-O8B   | 122(3)     | Fe7-Mo4-C6B-O6B   | 177(7)     |
| Mo3-Fe7-C14B-O14B | 94(4)      | Fe7-Fe5-C9B-O9B   | 136(3)     |
| Mo3-Fe8-C16B-O16B | 128(8)     | Fe7-Fe8-C16B-O16B | 177(8)     |
| Mo3-Fe8-C18B-O18B | -173(14)   | Fe7-Fe8-C18B-O18B | -127(14)   |
| Mo3-Fe8-C19B-Fe5  | -178.6(8)  | Fe7-Fe8-C19B-Mo3  | -90.6(7)   |
| Mo3-Fe8-C19B-Fe6  | -89.4(6)   | Fe7-Fe8-C19B-Fe5  | 90.8(6)    |
| Mo3-Fe8-C19B-Fe7  | 90.6(7)    | Fe7-Fe8-C19B-Fe6  | 179.9(10)  |
| Mo4-Fe5-C9B-O9B   | -175(3)    | Fe8-Fe5-C9B-O9B   | 167(2)     |
| Mo4-Fe6-C7B-Mo3   | -54.7(4)   | Fe8-Fe6-C7B-Mo3   | 42.5(5)    |
| Mo4-Fe6-C7B-O7B   | 116(4)     | Fe8-Fe6-C7B-O7B   | -147(4)    |
| Mo4-Fe6-C19B-Mo3  | 91.5(7)    | Fe8-Fe6-C19B-Mo3  | -93.9(7)   |
| Mo4-Fe6-C19B-Fe5  | -90.3(7)   | Fe8-Fe6-C19B-Mo4  | 174.5(10)  |
| Mo4-Fe6-C19B-Fe8  | -174.5(10) | Fe8-Fe6-C19B-Fe5  | 84.2(7)    |
| Mo4-Fe7-C8B-O8B   | 175(3)     | Fe8-Fe7-C8B-Mo4   | -7.9(12)   |
| Mo4-Fe7-C14B-O14B | 158(4)     | Fe8-Fe7-C8B-O8B   | 166.9(19)  |
| Fe5-Mo4-C6B-O6B   | -118(8)    | Fe8-Fe7-C14B-O14B | 28(4)      |
| Fe5-Fe6-C7B-Mo3   | -18.8(18)  | C4B-Mo4-C6B-O6B   | -6(8)      |
| Fe5-Fe6-C7B-O7B   | 152(3)     | C5B-Mo4-C6B-O6B   | 83(8)      |
| Fe5-Fe6-C19B-Mo3  | -178.1(10) | C7B-Fe6-C19B-Mo3  | 7.9(9)     |
| Fe5-Fe6-C19B-Mo4  | 90.3(7)    | C7B-Fe6-C19B-Mo4  | -83.7(8)   |
| Fe5-Fe6-C19B-Fe8  | -84.2(7)   | C7B-Fe6-C19B-Fe5  | -174.0(7)  |
| Fe5-Fe7-C8B-Mo4   | 40.5(4)    | C7B-Fe6-C19B-Fe8  | 101.8(8)   |
| Fe5-Fe7-C8B-O8B   | -145(2)    | C8B-Mo4-C6B-O6B   | 67(9)      |
| Fe5-Fe7-C14B-O14B | -35(5)     | C8B-Fe7-C14B-O14B | -169(4)    |
| Fe5-Fe8-C16B-O16B | -132(8)    | C10B-Fe6-C7B-Mo3  | -149.1(9)  |
| Fe5-Fe8-C18B-O18B | 99(14)     | C10B-Fe6-C7B-O7B  | 22(4)      |
| Fe5-Fe8-C19B-Mo3  | 178.6(8)   | C10B-Fe6-C19B-Mo3 | 127.4(14)  |
| Fe5-Fe8-C19B-Fe6  | 89.2(7)    | C10B-Fe6-C19B-Mo4 | 35.9(17)   |
| Fe5-Fe8-C19B-Fe7  | -90.8(6)   | C10B-Fe6-C19B-Fe5 | -54.4(17)  |
| Fe6-Mo4-C6B-O6B   | -155(8)    | C10B-Fe6-C19B-Fe8 | -138.6(14) |
| Fe6-Fe5-C9B-O9B   | -130(3)    | C11B-Fe6-C7B-Mo3  | 117.2(6)   |
| Fe6-Fe8-C16B-O16B | 176(7)     | C11B-Fe6-C7B-O7B  | -72(4)     |
| Fe6-Fe8-C18B-O18B | 130(14)    | C11B-Fe6-C19B-Mo3 | -101.2(8)  |
| Fe6-Fe8-C19B-Mo3  | 89.4(6)    | C11B-Fe6-C19B-Mo4 | 167.3(7)   |

|                    |            |                |           |
|--------------------|------------|----------------|-----------|
| C11B-Fe6-C19B-Fe5  | 77.0(9)    | K1-O1-C1-C6    | 30.0(4)   |
| C11B-Fe6-C19B-Fe8  | -7.2(11)   | K1-O1-C7-C8    | -34.0(4)  |
| C12B-Fe5-C9B-O9B   | -56(3)     | K1-O2-C8-C7    | -62.6(4)  |
| C13B-Fe5-C9B-O9B   | 36(3)      | K1-O2-C9-C10   | 61.1(4)   |
| C14B-Fe7-C8B-Mo4   | -154.2(5)  | K1-O3-C10-C9   | 34.1(4)   |
| C14B-Fe7-C8B-O8B   | 21(3)      | K1-O3-C11-C12  | -40.6(4)  |
| C15B-Fe7-C8B-Mo4   | 123.9(5)   | K1-O4-C12-C11  | -54.8(4)  |
| C15B-Fe7-C8B-O8B   | -61(3)     | K1-O4-C13-C14  | 53.0(4)   |
| C15B-Fe7-C14B-O14B | -76(4)     | K1-O5-C14-C13  | 42.8(5)   |
| C16B-Fe8-C18B-O18B | -67(14)    | K1-O5-C15-C16  | -38.8(5)  |
| C16B-Fe8-C19B-Mo3  | -89.9(9)   | K1-O6-C6-C1    | -33.3(5)  |
| C16B-Fe8-C19B-Fe5  | 91.4(9)    | K1-O6-C6-C5    | 148.1(4)  |
| C16B-Fe8-C19B-Fe6  | -179.4(8)  | K1-O6-C16-C15  | -55.9(4)  |
| C16B-Fe8-C19B-Fe7  | 0.7(10)    | O1-C1-C2-C3    | -178.3(4) |
| C17B-Fe8-C16B-O16B | -53(8)     | O1-C1-C6-O6    | 1.6(5)    |
| C17B-Fe8-C18B-O18B | 25(14)     | O1-C1-C6-C5    | -179.8(4) |
| C17B-Fe8-C19B-Mo3  | 159.5(10)  | O1-C7-C8-O2    | 63.7(4)   |
| C17B-Fe8-C19B-Fe5  | -19.1(13)  | O2-C9-C10-O3   | -62.8(4)  |
| C17B-Fe8-C19B-Fe6  | 70.1(12)   | O3-C11-C12-O4  | 63.3(4)   |
| C17B-Fe8-C19B-Fe7  | -109.9(11) | O4-C13-C14-O5  | -63.8(5)  |
| C18B-Fe8-C16B-O16B | 43(8)      | O5-C15-C16-O6  | 63.3(5)   |
| C18B-Fe8-C19B-Mo3  | 23.9(15)   | C1-O1-C7-C8    | 177.7(3)  |
| C18B-Fe8-C19B-Fe5  | -154.7(13) | C1-C2-C3-C4    | -0.7(7)   |
| C18B-Fe8-C19B-Fe6  | -65.6(15)  | C2-C1-C6-O6    | -175.8(4) |
| C18B-Fe8-C19B-Fe7  | 114.5(13)  | C2-C1-C6-C5    | 2.8(6)    |
| C19B-Mo4-C6B-O6B   | -163(8)    | C2-C3-C4-C5    | 0.8(7)    |
| C19B-Fe5-C9B-O9B   | -178(3)    | C3-C4-C5-C6    | 0.9(7)    |
| C19B-Fe6-C7B-Mo3   | -6.7(8)    | C4-C5-C6-O6    | 175.8(4)  |
| C19B-Fe6-C7B-O7B   | 164(4)     | C4-C5-C6-C1    | -2.7(7)   |
| C19B-Fe7-C8B-Mo4   | -5.9(7)    | C6-O6-C16-C15  | 90.8(5)   |
| C19B-Fe7-C8B-O8B   | 169(2)     | C6-C1-C2-C3    | -1.2(6)   |
| C19B-Fe7-C14B-O14B | 76(4)      | C7-O1-C1-C2    | -5.7(5)   |
| C19B-Fe8-C16B-O16B | 177(8)     | C7-O1-C1-C6    | 177.1(4)  |
| C19B-Fe8-C18B-O18B | 170(14)    | C8-O2-C9-C10   | -171.3(4) |
| K1-O16A-C16A-Fe4   | -64(6)     | C9-O2-C8-C7    | 170.1(4)  |
| K1-O1-C1-C2        | -152.8(3)  | C10-O3-C11-C12 | 180.0(3)  |

|                  |           |                 |           |
|------------------|-----------|-----------------|-----------|
| C11-O3-C10-C9    | 174.0(3)  | C20-C21-C22-O12 | 178.8(4)  |
| C12-O4-C13-C14   | -179.9(4) | C20-C21-C22-C17 | 0.4(6)    |
| C13-O4-C12-C11   | 178.1(4)  | C22-O12-C32-C31 | -177.8(3) |
| C14-O5-C15-C16   | 174.3(4)  | C22-C17-C18-C19 | 1.8(7)    |
| C15-O5-C14-C13   | -169.5(4) | C23-O7-C17-C18  | -5.4(6)   |
| C16-O6-C6-C1     | -176.5(4) | C23-O7-C17-C22  | 177.0(4)  |
| C16-O6-C6-C5     | 4.9(6)    | C24-O8-C25-C26  | 168.7(4)  |
| K2-O16B-C16B-Fe8 | 110(7)    | C25-O8-C24-C23  | -172.7(4) |
| K2-O7-C17-C18    | -147.7(4) | C26-O9-C27-C28  | -178.2(4) |
| K2-O7-C17-C22    | 34.6(4)   | C27-O9-C26-C25  | -179.9(4) |
| K2-O7-C23-C24    | 55.2(4)   | C28-O10-C29-C30 | -175.0(3) |
| K2-O8-C24-C23    | 37.7(5)   | C29-O10-C28-C27 | 180.0(3)  |
| K2-O8-C25-C26    | -41.7(5)  | C30-O11-C31-C32 | -171.4(4) |
| K2-O9-C26-C25    | -53.2(4)  | C31-O11-C30-C29 | 172.6(4)  |
| K2-O9-C27-C28    | 55.3(4)   | C32-O12-C22-C17 | -175.8(3) |
| K2-O10-C28-C27   | 39.3(4)   | C32-O12-C22-C21 | 5.7(6)    |
| K2-O10-C29-C30   | -33.7(4)  |                 |           |
| K2-O11-C30-C29   | -61.4(4)  |                 |           |
| K2-O11-C31-C32   | 63.0(4)   |                 |           |
| K2-O12-C22-C17   | -29.5(4)  |                 |           |
| K2-O12-C22-C21   | 152.1(3)  |                 |           |
| K2-O12-C32-C31   | 34.4(4)   |                 |           |
| O7-C17-C18-C19   | -175.8(4) |                 |           |
| O7-C17-C22-O12   | -2.7(5)   |                 |           |
| O7-C17-C22-C21   | 175.9(4)  |                 |           |
| O7-C23-C24-O8    | -61.9(5)  |                 |           |
| O8-C25-C26-O9    | 62.9(5)   |                 |           |
| O9-C27-C28-O10   | -62.9(4)  |                 |           |
| O10-C29-C30-O11  | 63.3(4)   |                 |           |
| O11-C31-C32-O12  | -64.6(4)  |                 |           |
| C17-O7-C23-C24   | -90.4(5)  |                 |           |
| C17-C18-C19-C20  | -0.1(7)   |                 |           |
| C18-C17-C22-O12  | 179.5(4)  |                 |           |
| C18-C17-C22-C21  | -2.0(6)   |                 |           |
| C18-C19-C20-C21  | -1.5(7)   |                 |           |
| C19-C20-C21-C22  | 1.3(7)    |                 |           |

## References

- 1) Beamson, G.; Pickup, B. T.; Li, W.; Mai, S.-M. XPS Studies of Chain Conformation in PEG, PTrMO, and PTMG Linear Polyethers. *J. Phys. Chem. B* **2000**, *104* (12), 2656–2672. <https://doi.org/10.1021/jp9905629>.
- 2) CrysAlisPro V1.171.41.70a. Rigaku Oxford Diffraction, The Woodlands, TX, USA .
- 3) SHELXT. Sheldrick, G. M. (2015) *Acta. Cryst.* A71, 3-8.
- 4) Sheldrick, G. M. (2015). SHELXL-2013/3. Program for the Refinement of Crystal Structures. *Acta Cryst.*, C71, 3-8.
- 5) Spek, A. L. (2009). PLATON, A Multipurpose Crystallographic Tool. Utrecht University, The Netherlands. *Acta Cryst.* D65, 148-155.
- 6) OLEX2. Dolomanov, O. V., Bourhis, L. J., Gildea, R. J., Howard, J. A. K. and Puschmann, H. A Complete Structure Solution, Refinement and Analysis Program. *J. Appl. Cryst.* 42, 339-341.
- 7)  $R_w(F^2) = \{\sum w(|F_o|^2 - |F_c|^2)^2 / \sum w(|F_o|^4)\}^{1/2}$  where w is the weight given each reflection.  
 $R(F) = \sum (|F_o| - |F_c|) / \sum |F_o|$  for reflections with  $F_o > 4(\sigma(F_o))$ .  $S = [\sum w(|F_o|^2 - |F_c|^2)^2 / (n-p)]^{1/2}$ , where n is the number of reflections and p is the number of refined parameters.
- 8) International Tables for X-ray Crystallography (1992). Vol. C, Tables 4.2.6.8 and 6.1.1.4, A. J. C. Wilson, editor, Boston: Kluwer Academic Press.
- 9) Sheldrick, G. M. (1994). SHELXTL/PC (Version 5.03). Siemens Analytical X-ray Instruments, Inc., Madison, Wisconsin, USA.
- 10) CrystalClear 1.40 (2008). Rigaku Americas Corporation, The Woodlands, TX.
